# Supplementary material for: Machine learning and feature extraction for rapid antimicrobial resistance prediction of Acinetobacter baumannii from whole-genome sequencing data
Source: Front Microbiol. 2024 Jan 11;14:1320312. doi: 10.3389/fmicb.2023.1320312 (PMC10808480; doi:10.3389/fmicb.2023.1320312)
Supplement: Supplementary file 2 [file Table_1.XLSX]

## Sheet: Sheet1
Table S1. All assembly statistics of 459 A. baumannii isolates.
Strain_ID	Number_of_contigs	Largest_contig	Total length	GC (%)	N50	N90	L50	L90
1601B17	67	364690	4185434	38.98	133599	47839	9	26
1601B19	57	272720	3852476	38.94	148044	42755	10	27
1601B31	64	347925	4002954	38.87	165491	47327	9	25
1601B43	79	364690	4070744	38.89	147157	47350	10	29
1601B56	49	459040	3970878	38.86	204952	52992	7	22
1601B80	54	408115	3748361	38.75	135184	51601	8	28
1601H03	57	450433	3750672	38.75	135184	50812	8	28
1601H04	104	236690	3645691	39.06	69056	22109	17	52
1601H07	68	287603	3905297	38.79	157685	42755	10	29
1601H10	106	247404	3680059	39	80957	21539	14	47
1601H13	69	287603	3905659	38.8	157685	42755	10	29
1601H15	63	394785	3854902	38.73	152793	45486	9	28
1601H17	102	263547	3768074	38.98	97131	22073	12	41
1601H18	74	355013	3853089	38.95	153084	42602	9	27
1601H23	48	458940	3971894	38.86	220657	76623	7	19
1601H26	200	140606	3795204	38.95	40914	11646	29	93
1601H37	58	272720	3853823	38.94	148271	47162	10	27
1601H43	46	458726	3968831	38.86	169754	56789	7	21
1601H50	64	364790	4185193	38.98	142877	50534	9	25
1605B20	67	347528	3971468	38.85	168181	44543	8	25
1605B24	67	292970	3912056	38.95	168181	47162	9	24
1605B80	64	347533	3879710	38.93	157677	47162	9	25
1605H01	62	347528	3898554	38.95	195081	48035	8	21
1605H05	63	355099	3948770	39	164995	65614	8	21
1605H06	64	272906	4000183	38.85	173634	47162	9	24
1605H09	57	292970	3909644	38.84	168181	47987	9	25
1605H10	72	364690	4055029	38.84	137220	50528	10	27
1605H11	68	272906	4034348	38.87	165304	47327	10	25
1605H13	59	292970	3916851	38.83	194221	47982	8	23
1605H14	60	383880	3946425	38.87	140233	48032	9	26
1605H18	77	301885	4162474	38.97	143922	50560	11	29
1605H19	72	335005	4081321	38.85	146964	41752	10	30
1605H21	63	293070	3958386	38.83	164500	48175	9	26
1605H23	71	345830	3991735	38.85	162450	47211	9	25
1605H25	66	364690	4059498	38.88	143873	53324	10	25
1605H27	67	255950	3878535	38.93	131013	42602	11	28
1605H31	81	292712	3909552	38.94	169327	47162	9	26
1606B21	100	280146	3974905	38.73	102457	26856	12	40
1606B35	66	347528	3895815	38.88	194222	42605	8	24
1606B38	70	276690	3988070	38.72	146606	38138	10	31
1606B44	69	364789	4062630	38.87	146729	43283	9	27
1606H34	71	292713	3904768	38.96	168181	47681	9	25
1606H35	54	364690	4012728	38.98	165120	55471	8	22
1606H36	27	1389075	3936243	38.76	398494	126901	3	9
1606H37	75	347534	3945670	38.9	194378	47161	9	24
1606H38	49	292949	3888761	38.82	184726	67843	9	22
1606H39	53	292970	3861595	38.94	184727	47982	9	23
1606H40	57	364690	4057509	39	164008	65564	9	23
1606H41	73	364691	4087231	38.83	133780	45084	12	30
1606H42	64	310780	3946762	38.9	150162	37470	11	30
1606H43	57	272896	3935969	38.81	184678	47162	9	25
1607B46	49	553424	4019288	38.69	314960	53875	5	18
1607B52	79	331700	4040362	38.81	152218	35389	9	30
1607B62	108	245648	4195199	38.81	89368	30387	13	45
1608B43	117	235501	3630088	38.96	68544	21694	15	53
1608B63	100	280438	3714095	38.95	79046	29555	14	44
1608H18	62	272906	3935545	38.84	168181	42755	9	25
1608H26	70	292960	3918545	38.87	162449	42755	9	28
1608H34	125	254270	3806183	39.02	57076	17834	18	61
1608H46	62	364690	4098624	39.06	162100	49735	10	25
1609B77	44	458880	3952065	38.85	200158	69260	7	20
1609H16	54	292970	3816309	38.94	162450	48034	9	23
1609H17	77	379942	3987609	38.83	146966	42602	9	26
1609H22	57	398893	3992239	38.85	166933	48063	8	24
1609H33	81	447786	3831444	39.01	110887	28743	9	35
1609H34	101	253486	3655577	39.09	88812	20431	14	50
1609H47	78	364791	4055964	38.89	146727	46147	10	28
1610B02	65	416167	4110360	38.82	203453	42698	8	24
1610B03	118	219914	4150685	39.05	74620	22612	18	58
1610B04	67	416267	4101935	38.83	203453	45845	8	25
1610B05	64	382833	3961668	38.87	176143	52993	8	24
1610B06	77	292970	3897874	38.96	122174	35608	11	35
1610B08	73	349472	4108190	38.82	139810	45845	10	29
1610B10	100	364690	4043025	38.81	159312	31222	9	34
1610B11	66	364791	4037672	38.8	147132	42136	10	28
1610B19	61	347895	3899912	38.96	162450	48134	9	23
1610B20	59	364690	3897068	38.99	187719	50534	8	22
1610B28	48	431328	3866240	38.93	171321	54158	8	23
1610B31	62	364690	4077146	39.03	181948	54694	8	22
1610B32	52	431124	3865520	38.93	164668	50425	8	25
1610B33	59	364790	3912478	38.82	190421	50534	8	26
1610B34	65	305949	3898972	38.96	168181	47211	9	23
1610B35	93	364527	4043924	38.81	159312	33445	9	31
1610B36	68	270179	3980922	38.82	130884	40281	10	30
1610B37	65	364690	3937153	38.86	116940	45014	9	30
1610B39	54	304827	4034986	38.78	156221	51238	9	26
1610B41	77	462303	3901335	38.99	162142	36791	7	23
1610B42	61	347895	3899027	38.96	194221	48034	8	22
1610B44	57	364690	4039666	38.88	181933	67356	8	20
1610B47	62	364791	4037151	38.8	153436	50528	9	27
1610B55	69	364690	3854532	38.95	190420	36135	8	28
1610B63	53	347526	3933364	38.84	194221	50528	8	21
1610B66	77	406886	3929897	39	133806	36424	10	30
1610B67	61	272905	3966070	38.81	184678	47982	9	25
1610B74	60	292712	3966535	38.81	189902	48176	9	24
1610B78	57	383071	3926080	38.91	184550	50528	7	19
1610B80	38	430382	4004574	38.86	175085	66001	8	21
1610H07	55	385582	3995295	39.03	162096	72819	9	23
1610H10	20	1037874	3826253	38.72	478766	126870	3	9
1610H15	42	382416	3931701	38.95	222159	74439	7	18
1610H24	63	407349	4002225	38.92	170235	50510	7	24
1610H26	110	194297	3758699	39.06	74452	22177	17	55
1610H27	63	407349	4000853	38.91	170235	50510	7	24
1610H30	74	406886	3931219	39	134440	41240	9	28
1610H31	31	1160298	4125574	38.87	261878	71120	4	13
1610H38	21	1987968	4051388	38.96	460160	104913	2	8
1610H41	61	364790	4155566	38.95	164117	53266	9	24
1610H44	64	364691	4005240	38.87	164086	53324	9	24
1610H46	59	364690	4040668	38.89	181933	67356	8	20
1610H48	54	347895	3938146	38.8	164672	50534	9	24
1610H50	77	268268	4054004	38.8	105440	37741	11	33
1611B05	80	364691	3989436	38.98	133807	47926	11	28
1611B29	65	355060	3948660	38.9	164865	65614	9	22
1611B61	50	501937	4162466	38.91	295744	72821	6	17
1611H01	54	398898	3849242	38.95	155701	42602	8	24
1611H03	65	303514	3912341	38.95	195081	42602	8	25
1611H05	51	398898	3848900	38.95	155701	48322	8	23
1611H06	53	398898	3918773	38.85	162448	47742	8	24
1611H08	64	293070	3895950	38.97	194221	47982	9	22
1611H09	65	364790	4007647	39.02	137320	50528	10	24
1611H13	54	398898	3919186	38.85	162448	42602	8	25
1611H14	66	292971	3910369	38.95	188139	47162	9	23
1611H15	50	374933	3866206	38.92	184726	59324	8	21
1611H19	80	303190	3933068	38.95	194221	41989	8	26
1611H22	52	398900	3919967	38.85	162448	47742	8	24
1611H23	53	398900	3919576	38.85	157938	48032	9	25
1611H24	54	398900	3919566	38.85	162141	42602	8	25
1611H26	78	303514	3930871	38.94	194221	41989	8	26
1611H27	68	364690	4062965	39.03	133599	50528	10	25
1611H29	58	284653	3833712	38.94	168181	48114	9	24
1611H30	61	364690	3986795	39.05	131811	50419	10	25
1611H39	52	398900	3919510	38.85	162123	47985	8	24
1612B04	83	364691	4095686	38.89	164970	38801	9	32
1612B28	45	414349	3871024	38.74	178080	51441	7	24
1612B52	64	497438	4074218	38.87	220223	49067	7	20
1612B53	64	466982	4130881	38.95	220614	56789	7	20
1612B55	48	1000161	4015650	38.7	482688	77476	3	11
1612B78	61	432872	4022918	38.89	169683	54684	7	22
1612H04	67	364790	4090534	38.96	137118	53324	10	26
1612H05	61	377955	3826462	38.92	122622	33281	10	30
1612H06	66	364690	4012191	38.91	147100	50522	8	24
1612H07	75	451299	4135126	38.67	179978	37146	8	27
1612H09	94	340342	3734641	39.06	92545	26708	12	44
1612H11	56	497471	4026104	38.85	220223	49067	6	20
1612H13	56	347895	3873942	38.93	194221	48065	8	22
1612H15	67	293501	3837490	38.91	157665	42755	9	28
1612H16	74	364791	4077287	38.87	153540	40216	10	30
1612H17	61	466982	4136081	38.94	227891	48122	7	21
1612H18	76	364690	4131706	38.98	131120	42602	11	30
1612H20	51	441882	4121435	38.98	203983	50554	7	22
1612H21	78	321620	4082463	38.89	147144	38848	10	32
1612H26	82	364791	4095826	38.89	164970	38801	9	31
1612H27	51	364690	4113663	38.94	175564	69317	8	22
1612H28	56	364790	3890162	38.85	147016	70322	9	24
1612H32	52	497374	4024597	38.85	315307	50467	6	17
1612H34	75	364691	4082383	38.89	164970	38848	9	30
1612H37	53	364789	4112706	38.94	175564	69304	8	22
1612H38	74	364691	4082241	38.89	164970	38848	9	29
1612H48	96	360130	3743108	39.07	90090	27595	13	43
1613B25	77	293070	3944777	38.84	162450	47404	9	26
1613B55	78	364690	4165063	38.97	143653	50523	9	27
1613B63	55	349476	3886425	38.93	184726	48033	8	23
1613H05	59	272906	3743337	38.93	168180	42604	9	26
1613H06	67	292970	3955521	38.85	162092	42755	9	27
1613H24	65	461829	3928606	38.87	220491	41882	7	22
1613H25	67	364790	4118007	38.97	143702	69317	9	25
1613H26	84	402399	3898548	39.01	96110	26719	10	39
1613H29	56	287585	3923234	38.83	184827	47162	9	24
1613H31	67	364791	4061342	39.05	164086	55233	8	21
1613H35	66	303188	3927479	38.85	158708	42605	10	27
1613H37	83	355089	3966660	38.99	139623	50522	9	25
1613H43	57	347526	3869565	38.92	164341	47162	9	23
1613H46	82	354989	3967040	38.99	139623	50522	9	25
1614BY814	46	723892	3944566	38.9	202497	50439	7	20
1614BY834	69	466981	4038287	39.06	220723	54067	7	21
1614H05	70	466982	4111863	38.96	220316	54173	7	22
1614H09	80	365702	3955443	38.9	160652	29984	10	29
1614H13	61	514851	3827824	38.99	211299	38807	6	24
1614H22	63	514851	3828130	38.99	205654	38807	6	25
1614H36	29	848725	3735460	38.85	434044	145013	3	9
1614H45	61	273683	3983621	38.66	127709	45574	11	32
1614H50	113	206413	3853756	39.1	75982	20857	16	52
1614HY019	57	467445	4016290	39.05	220723	56789	7	19
1614HY734	69	466983	4035379	39.06	220723	54173	7	21
1614HY747	66	466982	4036201	39.06	220633	56789	7	20
1614HY754	67	466982	4039220	39.06	220993	54067	7	21
1614HY767	59	292970	3953742	38.9	164332	48324	10	27
1614HY768	65	467015	4037710	39.05	220797	56789	7	20
1614HY799	64	466983	4038266	39.05	220633	54173	7	21
1615B10	48	364689	3871963	39.04	178009	55244	8	21
1615B13	52	364690	3864592	38.94	204343	52253	8	21
1615B17	43	426551	3973384	39	175828	61405	7	19
1615B25	72	364582	4030540	38.85	149031	47817	9	28
1615B26	54	287275	3821273	38.93	169042	43908	9	25
1615B47	49	364769	4143541	38.91	168534	65563	9	24
1615B60	69	467015	3994149	38.89	220620	50528	7	22
1615B79	69	355240	4042050	38.84	146726	42602	10	27
1615H01	69	364690	4022472	38.82	149029	42602	9	27
1615H02	90	315521	4146599	38.96	139236	34950	11	33
1615H03	97	305782	4190735	38.96	139236	32000	12	36
1615H05	51	364790	3933022	38.85	187148	50792	9	23
1615H07	57	338438	3893802	38.85	176141	56789	9	24
1615H09	49	364690	3864507	38.94	204343	52253	8	21
1615H12	49	364112	3842562	39.03	167906	56789	8	21
1615H13	46	385580	3871540	39.04	220508	56789	7	19
1615H14	43	458830	3953085	38.9	200246	69260	9	21
1615H18	89	316870	3995819	38.87	122914	36682	10	32
1615H22	54	287275	3919106	38.81	184678	47162	9	25
1615H23	115	364790	4064711	38.82	149029	41211	9	28
1615H25	49	364690	3864629	38.94	204300	52253	8	21
1615H26	99	292330	3861116	38.97	98686	24744	12	39
1615H27	74	347865	3952563	38.9	194425	42605	9	24
1615H29	91	316903	3997297	38.88	122914	36678	10	31
1615H30	65	364790	4098731	39.06	151610	49735	10	26
1615H35	61	407738	4000655	38.82	175828	54998	8	23
1615H45	47	385580	3871207	39.04	220508	55244	7	20
1615H46	72	364690	4033871	38.83	153539	42602	9	27
1615H47	70	364690	4033197	38.83	153379	50639	9	26
1615H49	51	364689	3919994	38.87	169669	52993	9	24
1615H50	52	364581	3871486	39.04	178052	55244	8	21
1801B39	100	270087	3824322	39.12	81554	25528	14	44
1801H01	195	126950	3847654	39.11	42707	11509	29	93
1801H10	119	213558	3660259	39.09	67316	21623	18	54
1801H20	67	310773	3946902	38.85	150076	37470	10	29
1802H03	62	292970	3985436	38.85	168163	42605	9	25
1802H04	47	649936	3976643	38.63	272869	72964	5	15
1802H06	63	364790	4069823	38.87	164391	50522	9	23
1802H07	59	292813	3887899	38.94	184678	42602	9	23
1802H08	60	349107	3890914	38.93	164196	49241	9	24
1802H09	44	650206	3975841	38.62	272869	72964	5	14
1802H10	181	135500	3711836	39.02	41121	13903	32	92
1802H11	60	292970	3889121	38.93	184678	42602	9	23
1802H12	73	347895	3950573	38.83	194221	42605	8	23
1802H14	64	292970	3963824	38.82	184678	39723	9	24
1802H19	58	292970	3856296	38.95	194221	42603	8	24
1802H21	54	364690	3792637	38.97	143587	50534	9	25
1802H23	73	461945	4097608	38.9	181354	41371	7	25
1802H27	73	347528	3946570	38.86	194222	47161	8	23
1802H28	73	347528	3912396	38.95	194221	42602	8	24
1802H30	72	364690	4161419	38.93	130287	50528	11	29
1802H38	156	364790	4047998	39.41	130246	1193	13	81
1802H39	69	364690	4019369	38.94	133807	42602	10	28
1802H40	73	257029	4026770	38.87	137292	42606	11	29
1802H41	66	347527	4025072	38.87	157707	47327	10	26
1803B01	63	292747	3890153	38.94	168068	50431	10	24
1803B03	40	438129	3841746	38.68	206254	66959	7	20
1803B23	76	665036	3804165	38.94	127583	41314	8	24
1803B37	68	292713	3921697	38.95	162717	45323	9	27
1803H31	69	292713	3988465	38.85	162092	42604	10	28
1804B16	75	292970	3881090	38.94	140074	47745	10	26
1804B19	62	408572	3968908	38.88	175828	65352	8	23
1804B24	11	1969947	3767133	38.93	1969947	196800	1	6
1804B30	67	272720	3883098	38.97	168181	42755	9	25
1804B44	196	364790	4093030	39.55	149200	1003	9	103
1804B60	104	310217	3743742	39.04	89546	24541	13	44
1804B63	58	275064	3891029	38.95	168181	44161	9	24
1804B78	59	249243	4125658	39.13	149171	50528	11	27
1804B79	54	347527	3935967	38.8	162096	47744	9	25
1804H06	58	293010	3934495	38.85	168181	47162	9	24
1804H08	69	292713	3980656	38.85	172046	42605	9	26
1804H10	59	364790	4068494	39	162093	65353	9	25
1804H16	45	450862	3986678	38.68	236522	63726	6	18
1804H21	78	292713	3882475	38.94	140074	47745	10	26
1804H23	63	364690	4080409	39	149041	51910	10	27
1804H26	62	272906	3927553	38.85	168181	47162	9	25
1805B01	79	272905	3883167	38.95	140074	48147	10	27
1805B09	63	292910	3945100	38.82	132047	50552	10	27
1805B28	58	364690	4063290	38.89	162093	57789	9	25
1805B49	54	364676	4126678	39.13	162094	65563	9	23
1805H08	57	364690	4062893	38.89	155985	50534	10	26
1805H14	129	272905	4099758	38.94	123856	23698	12	39
1805H27	61	480529	3866800	38.75	137686	39551	9	32
1805H30	63	474253	3861519	38.94	147299	44985	7	24
1806B13	34	466975	4044700	38.93	236411	73916	6	16
1806B26	88	292713	4019210	38.8	157685	32570	10	30
1806B34	49	365069	3902889	39.01	176979	59367	8	21
1806B41	77	272905	3882484	38.94	162717	47681	9	26
1806B43	98	292970	4101504	38.82	157685	31581	10	33
1806B60	9	2311998	3761881	38.76	2311998	264218	1	4
1806H10	69	292970	3894844	38.97	168181	47008	9	25
1806H15	62	466983	4145320	38.98	253582	50528	6	20
1806H16	79	365601	3955142	38.92	160634	29984	9	28
1806H17	64	467015	4145500	38.98	253623	50528	6	20
1806H19	80	292910	3924437	38.96	162450	38790	9	27
1807B06	60	292964	3953547	38.81	164344	48324	9	26
1807B07	74	320841	3830475	38.78	112971	44599	11	31
1807B13	60	293419	3971078	38.8	184678	47744	9	24
1807B18	23	1372749	3920181	38.77	746608	97843	2	8
1807B25	87	395808	4039642	38.84	155757	32573	9	28
1807B28	58	253279	3910238	38.84	137016	49125	11	29
1807B52	59	293200	3941605	38.82	164344	47745	9	26
1807B67	84	398245	4043172	38.84	165726	36091	8	25
1807B69	51	383827	3855282	38.67	140138	50470	9	25
1807H03	69	293010	3990884	38.82	162092	42603	10	26
1807H05	74	345731	3966757	38.8	194221	47681	8	23
1807H06	43	723984	3945432	38.72	202434	50439	6	19
1807H12	89	350269	4161870	38.81	131586	41211	11	32
1807H22	86	364627	4003386	38.79	159312	35659	9	33
1807H38	67	347528	3991489	38.82	168181	42607	9	25
1808B17	145	191994	3842573	38.96	55458	18026	21	65
1808H06	44	723984	3946546	38.73	202434	50439	6	19
1808H08	51	293049	3865609	38.92	184726	50528	9	23
1808H09	52	527569	3992714	38.76	216451	50753	7	21
1808H13	80	329186	3906150	38.93	162450	42606	9	24
1808H21	42	723984	3946458	38.72	202434	50439	6	19
1808H28	50	292949	3964946	38.81	184677	60217	9	23
1808H29	124	226693	3648572	38.94	77967	18207	15	53
1810B28	60	293070	3932980	38.84	184727	47983	9	24
1810H04	76	258212	3906206	38.79	131012	42101	12	33
1810H05	75	257985	3904662	38.79	121777	42101	12	34
1810H06	53	293100	3936303	38.8	151901	48175	9	27
1810H08	52	293049	3964494	38.81	184726	50528	9	24
1810H16	43	377323	3930658	38.73	186658	62509	8	21
1810H19	110	250171	4017239	38.94	85099	23627	15	45
1810H25	115	260788	4016221	38.94	84577	22540	14	47
1810H28	129	190015	3821715	39.06	68742	19060	19	59
1810H30	71	466983	4048112	39.04	178730	50528	7	22
1810H35	73	377532	3994638	38.91	220835	44039	7	24
1811B09	67	466983	4118782	38.95	220798	54173	7	21
1811B10	67	467015	4119119	38.94	220798	50528	7	22
1811B40	17	1391227	3759909	38.95	371194	174231	3	8
1811H10	66	466982	4118333	38.94	220798	60521	7	20
1811H14	93	364790	4023831	38.86	220798	46784	8	21
1811H72	84	292970	3946376	38.95	162450	42602	9	26
1811H77	18	1496088	3836817	38.47	353425	108901	3	9
1811H78	18	1847745	3836416	38.47	366659	108901	2	8
1811H81	68	466982	4117866	38.95	220633	54173	7	21
1811H85	30	1797242	3955204	38.8	441635	162152	2	7
1811H90	68	467015	4118325	38.95	192817	60521	7	21
1812H02	76	398894	3889622	38.97	147507	38791	8	30
1812H06	72	364691	4001473	38.84	131229	38800	9	30
1812H14	62	364791	4064290	39.06	164086	50528	8	23
1812H21	49	392868	4053971	38.94	178009	57111	8	22
1812H22	79	398894	3889194	38.97	116509	38791	10	32
1812H30	52	318709	4054564	38.94	169522	57111	9	24
1812H36	49	392868	4054262	38.94	178009	57111	8	22
1812H41	55	253379	3910982	38.85	153211	57235	10	26
1812H42	60	467015	3969248	38.87	220530	50522	7	22
1812H43	76	396801	3889207	38.97	147507	38791	8	30
2001B52	95	318530	3904757	38.8	98492	28620	13	43
2001B57	76	196997	3737578	38.92	105036	39529	14	37
2001H23	92	273285	3960912	38.76	99201	29483	14	41
2002B14	73	273186	3983444	38.85	131011	42752	10	31
2002H04	64	355002	3943143	39.03	133599	50528	11	27
2003B44	61	347528	3900448	38.96	195081	47152	8	22
2003B45	67	272906	3867779	38.95	162092	42602	10	26
2003H04	64	313801	4004483	38.86	168181	47327	9	25
2004B08	60	319124	3972302	38.97	198438	42604	8	25
2004H30	64	347527	3972585	38.85	164464	42605	9	27
2004H34	73	501319	4022324	39.03	171009	56789	6	21
2004H38	75	462319	3963352	38.91	157828	56004	7	22
2005B09	62	463477	3834680	38.99	139172	45127	8	27
2005B57	52	686933	3814664	38.99	176083	38807	5	21
2005H10	59	293070	3849756	38.95	168181	47989	9	22
2006H11	54	371950	3829031	38.9	207142	55128	8	20
2006H27	44	467015	4023566	38.86	272918	66397	6	18
2006H36	64	293200	3942211	38.81	146855	42602	9	27
2007B71	47	912964	3822917	39.1	174030	55641	6	20
2009H06	125	252529	3831120	39.02	89486	18173	16	53
2009H09	57	437620	3932830	38.98	229914	57682	6	20
2009H11	53	257985	3876513	38.89	156179	48326	10	27
2010B36	54	467081	4032184	38.85	204986	51446	7	22
2010H34	18	1118935	3829476	38.96	469447	178549	3	8
2010H50	66	467015	4118915	38.95	220798	60521	7	20
2010H62	66	347528	3998595	38.85	198439	47162	8	23
2011A01	49	460464	3818277	38.96	350189	55077	5	15
2011B50	58	347526	3932073	38.83	162450	47162	9	25
2011B62	64	347526	3972189	38.81	138764	48176	9	25
2011H03	64	292713	3892713	38.96	195081	43985	8	23
A4294106_1	64	350395	4005354	38.91	147233	51074	10	30
A4294106_2	62	268445	3749134	38.83	162092	42222	9	26
A4294106_3	70	349910	4007354	38.91	127181	51074	10	31
A4294106_4	64	256858	3752434	38.83	157629	42606	10	26
A4316057_1	69	364790	4002806	38.95	131812	41225	12	30
A4316057_2	73	364790	4006200	38.95	131813	39237	12	31
A4316057_3	70	364524	3998212	38.94	131813	42602	12	29
A4316057_4	76	268618	4016244	38.84	119383	34056	13	34
A4338474_1	55	293430	4002351	38.91	132027	38127	10	31
A4338474_2	55	257352	4002097	38.91	123465	44080	11	32
A4338474_3	60	293430	4014494	38.9	132027	37593	10	31
A4338474_4	52	293430	4023359	38.89	133166	45365	10	30
AR_0033	53	448573	4010614	38.94	206237	52756	7	21
AR_0035	56	506143	4054348	39	248185	57521	6	18
AR_0036	70	357032	4017049	38.97	108896	33356	11	34
AR_0037	62	517283	4012942	38.94	156824	52756	8	25
AR_0045	51	679070	3963912	39.08	312814	62328	5	14
AR_0063	128	175344	4001050	38.89	64611	21669	19	59
AR_0078	56	324742	3810637	39.05	171021	58210	8	23
AR_0083	89	506661	4065494	39.18	160654	42385	8	26
AR_0088	78	468476	4168961	38.93	185101	38028	8	25
AR_0101	82	328275	4098491	38.99	156169	27033	10	29
AR_0102	77	364909	3993187	39.03	153759	42602	10	28
ARLG_1775	114	223076	3903823	38.95	57516	25785	20	58
ARLG_1777	44	373065	3868155	38.9	180114	72052	8	22
ARLG_1788	195	577665	4089667	38.74	272368	22252	6	24
ARLG_1818	82	364790	4169166	38.99	178110	32986	8	28
ARLG_1854	102	206895	3999195	38.99	107250	31890	14	40
ARLG_1860	118	167529	4011653	39.05	72699	21141	21	59
ARLG_1894	115	162780	3955275	38.99	89159	23323	17	48
ARLG_1912	103	258495	4020843	38.93	90953	24566	16	49
ARLG_1915	137	353729	4034070	38.9	132658	21711	10	33
BJ16085	67	364790	4185262	38.98	133599	47939	9	26
BJ16092	74	364790	4071198	38.89	153439	47350	9	26
BJ16097	57	272906	3872782	38.93	184827	48115	9	22
FDA_CDC_AR_0273	74	372207	3955753	39	106542	39191	11	34
FDA_CDC_AR_0274	68	354955	3985792	39.09	164298	37028	9	25
FDA_CDC_AR_0275	71	355300	4117453	38.94	177013	41622	9	26
FDA_CDC_AR_0277	81	322118	4145197	38.94	116598	28200	11	37
FDA_CDC_AR_0278	73	354641	4193193	39.02	144549	47444	9	28
FDA_CDC_AR_0279	69	355379	4192342	39.02	156095	50552	10	28
FDA_CDC_AR_0280	61	306618	3974196	39.1	164298	42602	9	25
FDA_CDC_AR_0281	50	355621	3824557	39.02	164281	58272	9	22
FDA_CDC_AR_0282	67	364908	4072698	38.94	161109	42602	9	28
FDA_CDC_AR_0283	60	355215	4175419	39.02	171891	50661	9	26
FDA_CDC_AR_0284	92	260781	4047925	38.93	100383	33404	13	40
FDA_CDC_AR_0285	99	327276	4123808	38.83	167833	30285	9	34
FDA_CDC_AR_0286	72	354629	4129750	38.93	164327	44924	9	26
FDA_CDC_AR_0287	91	271825	3831627	38.92	114364	24026	13	43
FDA_CDC_AR_0288	54	397943	3963080	38.85	175009	55586	8	22
FDA_CDC_AR_0289	82	220588	3925571	38.97	117242	30854	13	37
FDA_CDC_AR_0290	61	364909	4174120	39.03	178110	50552	8	24
FDA_CDC_AR_0291	63	364909	4097086	38.95	164601	41586	8	26
FDA_CDC_AR_0292	170	81969	3938198	39.54	42778	4730	51	195
FDA_CDC_AR_0293	194	98958	3970010	39.51	40435	5759	40	148
FDA_CDC_AR_0294	171	130654	3776697	39.18	46649	12752	26	77
FDA_CDC_AR_0295	84	364909	4038540	38.93	108109	29012	12	40
FDA_CDC_AR_0296	187	140484	3904042	39.18	40894	12702	30	92
FDA_CDC_AR_0297	183	287371	3980109	39.12	51242	11327	22	82
FDA_CDC_AR_0298	127	257962	4054769	39.06	80440	17896	15	55
FDA_CDC_AR_0299	74	394218	4041125	38.81	164867	42711	9	28
FDA_CDC_AR_0300	65	364909	4027823	39.01	195892	44818	8	23
FDA_CDC_AR_0301	71	274920	3970856	39.02	147640	40045	11	31
FDA_CDC_AR_0302	109	253511	3981372	39.11	106570	26813	14	42
FDA_CDC_AR_0303	77	354853	4121872	38.9	164601	30801	9	32
FDA_CDC_AR_0304	125	328223	3910742	39.06	69455	18018	17	57
FDA_CDC_AR_0305	84	347773	4098603	38.94	149342	38105	10	30
FDA_CDC_AR_0306	76	409563	4153469	38.98	183775	51560	9	23
FDA_CDC_AR_0307	81	355192	4038484	39.01	159805	40749	9	26
FDA_CDC_AR_0308	76	275334	3995704	39.05	147077	27073	10	29
FDA_CDC_AR_0309	112	208582	3969534	39.12	106570	23314	14	42
FDA_CDC_AR_0310	114	224947	3987030	39.11	92999	24980	14	45
FDA_CDC_AR_0311	68	364909	3893059	38.87	121101	35731	9	31
FDA_CDC_AR_0312	63	346541	3987547	38.95	110515	38702	11	32
FDA_CDC_AR_0313	65	648968	3987207	39.1	201894	44854	6	20
GDZ16087	64	346121	3877870	38.93	157677	47162	9	25
GDZ16095	63	272249	3858503	38.93	160267	47747	10	27
GDZ16099	65	345830	3991876	38.85	162092	42602	9	26
HEB18091	61	358930	3956736	38.78	133919	35677	10	28
HEB18094	61	359514	3959018	38.79	141998	38790	10	28
SH16061	61	272906	3978248	38.85	167998	48147	9	24
SY16087	63	364790	4056974	38.99	178114	54419	8	24
SY16088	98	364791	4066145	38.84	131813	42602	11	30
SY16090	65	272720	3810471	38.96	184824	47162	9	25
WH18075	48	415447	4161637	38.98	220627	51685	7	19
XJ16115	63	364790	4021793	38.94	133464	41378	9	28
XJ16120	62	287603	3890475	38.95	194221	47162	9	23
ZJ16087	56	287603	3856743	38.95	194222	47745	8	22
ZJ16093	56	287603	3846645	38.95	185211	48054	8	22
ZJ18087	46	430382	4013343	38.88	166754	52612	8	22
