# Supplementary material for: Machine learning and feature extraction for rapid antimicrobial resistance prediction of Acinetobacter baumannii from whole-genome sequencing data
Source: Front Microbiol. 2024 Jan 11;14:1320312. doi: 10.3389/fmicb.2023.1320312 (PMC10808480; doi:10.3389/fmicb.2023.1320312)
Supplement: Supplementary file 3 [file Table_2.XLSX]

## Sheet: Model construction dataset
Table S2a. 339 A. baumannii isolates uesd for model construction.
Strain_ID	Specimen	Year	Country	Project	MLST	BioProject	BioSample
1601B17	blood	2016	China: Beijing	2016CARES	2	PRJNA1014981	SAMN37355228
1601B19	blood	2016	China: Beijing	2016CARES	2	PRJNA1014981	SAMN37355229
1601B31	blood	2016	China: Beijing	2016CARES	2	PRJNA1014981	SAMN37355230
1601B43	blood	2016	China: Beijing	2016CARES	2	PRJNA1014981	SAMN37355231
1601B56	blood	2016	China: Beijing	2016CARES	2	PRJNA1014981	SAMN37355232
1601B80	blood	2016	China: Beijing	2016CARES	457	PRJNA1014981	SAMN37355233
1601H03	sputum	2016	China: Beijing	2016CARES	457	PRJNA1014981	SAMN37355234
1601H04	sputum	2016	China: Beijing	2016CARES	Unknown	PRJNA1014981	SAMN37355235
1601H07	sputum	2016	China: Beijing	2016CARES	2	PRJNA1014981	SAMN37355236
1601H10	sputum	2016	China: Beijing	2016CARES	Unknown	PRJNA1014981	SAMN37355237
1601H13	sputum	2016	China: Beijing	2016CARES	2	PRJNA1014981	SAMN37355238
1601H15	sputum	2016	China: Beijing	2016CARES	457	PRJNA1014981	SAMN37355239
1601H17	sputum	2016	China: Beijing	2016CARES	106	PRJNA1014981	SAMN37355240
1601H18	sputum	2016	China: Beijing	2016CARES	2	PRJNA1014981	SAMN37355241
1601H23	sputum	2016	China: Beijing	2016CARES	2	PRJNA1014981	SAMN37355242
1601H26	sputum	2016	China: Beijing	2016CARES	139	PRJNA1014981	SAMN37355243
1601H37	sputum	2016	China: Beijing	2016CARES	2	PRJNA1014981	SAMN37355244
1601H43	sputum	2016	China: Beijing	2016CARES	2	PRJNA1014981	SAMN37355245
1601H50	sputum	2016	China: Beijing	2016CARES	2	PRJNA1014981	SAMN37355246
1605B20	blood	2016	China: Guangzhou	2016CARES	2	PRJNA1014981	SAMN37355247
1605B24	blood	2016	China: Guangzhou	2016CARES	2	PRJNA1014981	SAMN37355248
1605B80	blood	2016	China: Guangzhou	2016CARES	2	PRJNA1014981	SAMN37355249
1605H01	pleural fluid	2016	China: Guangzhou	2016CARES	2	PRJNA1014981	SAMN37355250
1605H05	sputum	2016	China: Guangzhou	2016CARES	2	PRJNA1014981	SAMN37355251
1605H06	sputum	2016	China: Guangzhou	2016CARES	2	PRJNA1014981	SAMN37355252
1605H09	sputum	2016	China: Guangzhou	2016CARES	2	PRJNA1014981	SAMN37355253
1605H10	sputum	2016	China: Guangzhou	2016CARES	2	PRJNA1014981	SAMN37355254
1605H11	tracheal aspirate	2016	China: Guangzhou	2016CARES	2	PRJNA1014981	SAMN37355255
1605H13	sputum	2016	China: Guangzhou	2016CARES	2	PRJNA1014981	SAMN37355256
1605H14	sputum	2016	China: Guangzhou	2016CARES	2	PRJNA1014981	SAMN37355257
1605H18	sputum	2016	China: Guangzhou	2016CARES	25	PRJNA1014981	SAMN37355258
1605H19	broncho-alveolar lavage	2016	China: Guangzhou	2016CARES	2	PRJNA1014981	SAMN37355259
1605H21	sputum	2016	China: Guangzhou	2016CARES	2	PRJNA1014981	SAMN37355260
1605H23	sputum	2016	China: Guangzhou	2016CARES	2	PRJNA1014981	SAMN37355261
1605H25	broncho-alveolar lavage	2016	China: Guangzhou	2016CARES	2	PRJNA1014981	SAMN37355262
1605H27	sputum	2016	China: Guangzhou	2016CARES	2	PRJNA1014981	SAMN37355263
1605H31	sputum	2016	China: Guangzhou	2016CARES	2	PRJNA1014981	SAMN37355264
1606B21	blood	2016	China: Guangzhou	2016CARES	Unknown	PRJNA1014981	SAMN37355265
1606B35	blood	2016	China: Guangzhou	2016CARES	2	PRJNA1014981	SAMN37355266
1606B38	blood	2016	China: Guangzhou	2016CARES	768	PRJNA1014981	SAMN37355267
1606B44	blood	2016	China: Guangzhou	2016CARES	2	PRJNA1014981	SAMN37355268
1606H34	sputum	2016	China: Guangzhou	2016CARES	2	PRJNA1014981	SAMN37355269
1606H35	sputum	2016	China: Guangzhou	2016CARES	2	PRJNA1014981	SAMN37355270
1606H36	sputum	2016	China: Guangzhou	2016CARES	68	PRJNA1014981	SAMN37355271
1606H37	sputum	2016	China: Guangzhou	2016CARES	Unknown	PRJNA1014981	SAMN37355272
1606H38	sputum	2016	China: Guangzhou	2016CARES	2	PRJNA1014981	SAMN37355273
1606H39	sputum	2016	China: Guangzhou	2016CARES	2	PRJNA1014981	SAMN37355274
1606H40	sputum	2016	China: Guangzhou	2016CARES	2	PRJNA1014981	SAMN37355275
1606H41	broncho-alveolar lavage	2016	China: Guangzhou	2016CARES	2	PRJNA1014981	SAMN37355276
1606H42	sputum	2016	China: Guangzhou	2016CARES	Unknown	PRJNA1014981	SAMN37355277
1606H43	sputum	2016	China: Guangzhou	2016CARES	2	PRJNA1014981	SAMN37355278
1607B46	blood	2016	China: Shenyang	2016CARES	396	PRJNA1014981	SAMN37355279
1607B52	blood	2016	China: Shenyang	2016CARES	249	PRJNA1014981	SAMN37355280
1607B62	blood	2016	China: Shenyang	2016CARES	220	PRJNA1014981	SAMN37355281
1608B43	blood	2016	China: Tianjin	2016CARES	454	PRJNA1014981	SAMN37355282
1608B63	blood	2016	China: Tianjin	2016CARES	36	PRJNA1014981	SAMN37355283
1608H18	sputum	2016	China: Tianjin	2016CARES	2	PRJNA1014981	SAMN37355284
1608H26	sputum	2016	China: Tianjin	2016CARES	2	PRJNA1014981	SAMN37355285
1608H34	sputum	2016	China: Tianjin	2016CARES	193	PRJNA1014981	SAMN37355286
1608H46	sputum	2016	China: Tianjin	2016CARES	2	PRJNA1014981	SAMN37355287
1609B77	blood	2016	China: Xi'an	2016CARES	2	PRJNA1014981	SAMN37355288
1609H16	sputum	2016	China: Xi'an	2016CARES	2	PRJNA1014981	SAMN37355289
1609H17	sputum	2016	China: Xi'an	2016CARES	2	PRJNA1014981	SAMN37355290
1609H22	sputum	2016	China: Xi'an	2016CARES	2	PRJNA1014981	SAMN37355291
1609H33	sputum	2016	China: Xi'an	2016CARES	34	PRJNA1014981	SAMN37355292
1609H34	sputum	2016	China: Xi'an	2016CARES	266	PRJNA1014981	SAMN37355293
1609H47	sputum	2016	China: Xi'an	2016CARES	2	PRJNA1014981	SAMN37355294
1610B02	blood	2016	China: Hangzhou	2016CARES	23	PRJNA1014981	SAMN37355295
1610B03	blood	2016	China: Hangzhou	2016CARES	153	PRJNA1014981	SAMN37355296
1610B04	blood	2016	China: Hangzhou	2016CARES	23	PRJNA1014981	SAMN37355297
1610B05	blood	2016	China: Hangzhou	2016CARES	2	PRJNA1014981	SAMN37355298
1610B06	blood	2016	China: Hangzhou	2016CARES	2	PRJNA1014981	SAMN37355299
1610B08	blood	2016	China: Hangzhou	2016CARES	23	PRJNA1014981	SAMN37355300
1610B10	blood	2016	China: Hangzhou	2016CARES	2	PRJNA1014981	SAMN37355301
1610B11	blood	2016	China: Hangzhou	2016CARES	2	PRJNA1014981	SAMN37355302
1610B19	blood	2016	China: Hangzhou	2016CARES	2	PRJNA1014981	SAMN37355303
1610B20	blood	2016	China: Hangzhou	2016CARES	2	PRJNA1014981	SAMN37355304
1610B28	blood	2016	China: Hangzhou	2016CARES	2	PRJNA1014981	SAMN37355305
1610B31	blood	2016	China: Hangzhou	2016CARES	2	PRJNA1014981	SAMN37355306
1610B32	blood	2016	China: Hangzhou	2016CARES	2	PRJNA1014981	SAMN37355307
1610B33	blood	2016	China: Hangzhou	2016CARES	2	PRJNA1014981	SAMN37355308
1610B34	blood	2016	China: Hangzhou	2016CARES	2	PRJNA1014981	SAMN37355309
1610B35	blood	2016	China: Hangzhou	2016CARES	2	PRJNA1014981	SAMN37355310
1610B36	blood	2016	China: Hangzhou	2016CARES	2	PRJNA1014981	SAMN37355311
1610B37	blood	2016	China: Hangzhou	2016CARES	2	PRJNA1014981	SAMN37355312
1610B39	blood	2016	China: Hangzhou	2016CARES	23	PRJNA1014981	SAMN37355313
1610B41	blood	2016	China: Hangzhou	2016CARES	2	PRJNA1014981	SAMN37355314
1610B42	blood	2016	China: Hangzhou	2016CARES	2	PRJNA1014981	SAMN37355315
1610B44	blood	2016	China: Hangzhou	2016CARES	2	PRJNA1014981	SAMN37355316
1610B47	blood	2016	China: Hangzhou	2016CARES	2	PRJNA1014981	SAMN37355317
1610B55	blood	2016	China: Hangzhou	2016CARES	2	PRJNA1014981	SAMN37355318
1610B63	blood	2016	China: Hangzhou	2016CARES	2	PRJNA1014981	SAMN37355319
1610B66	blood	2016	China: Hangzhou	2016CARES	2	PRJNA1014981	SAMN37355320
1610B67	blood	2016	China: Hangzhou	2016CARES	2	PRJNA1014981	SAMN37355321
1610B74	blood	2016	China: Hangzhou	2016CARES	2	PRJNA1014981	SAMN37355322
1610B78	blood	2016	China: Hangzhou	2016CARES	2	PRJNA1014981	SAMN37355323
1610B80	blood	2016	China: Hangzhou	2016CARES	2	PRJNA1014981	SAMN37355324
1610H07	sputum	2016	China: Hangzhou	2016CARES	2	PRJNA1014981	SAMN37355325
1610H10	sputum	2016	China: Hangzhou	2016CARES	68	PRJNA1014981	SAMN37355326
1610H15	sputum	2016	China: Hangzhou	2016CARES	2	PRJNA1014981	SAMN37355327
1610H24	sputum	2016	China: Hangzhou	2016CARES	2	PRJNA1014981	SAMN37355328
1610H26	sputum	2016	China: Hangzhou	2016CARES	252	PRJNA1014981	SAMN37355329
1610H27	sputum	2016	China: Hangzhou	2016CARES	2	PRJNA1014981	SAMN37355330
1610H30	sputum	2016	China: Hangzhou	2016CARES	2	PRJNA1014981	SAMN37355331
1610H31	sputum	2016	China: Hangzhou	2016CARES	46	PRJNA1014981	SAMN37355332
1610H38	sputum	2016	China: Hangzhou	2016CARES	46	PRJNA1014981	SAMN37355333
1610H41	sputum	2016	China: Hangzhou	2016CARES	2	PRJNA1014981	SAMN37355334
1610H44	sputum	2016	China: Hangzhou	2016CARES	2	PRJNA1014981	SAMN37355335
1610H46	sputum	2016	China: Hangzhou	2016CARES	2	PRJNA1014981	SAMN37355336
1610H48	sputum	2016	China: Hangzhou	2016CARES	2	PRJNA1014981	SAMN37355337
1610H50	sputum	2016	China: Hangzhou	2016CARES	23	PRJNA1014981	SAMN37355338
1611B05	blood	2016	China: Changsha	2016CARES	2	PRJNA1014981	SAMN37355339
1611B29	blood	2016	China: Changsha	2016CARES	Unknown	PRJNA1014981	SAMN37355340
1611B61	blood	2016	China: Changsha	2016CARES	25	PRJNA1014981	SAMN37355341
1611H01	sputum	2016	China: Changsha	2016CARES	2	PRJNA1014981	SAMN37355342
1611H03	broncho-alveolar lavage	2016	China: Changsha	2016CARES	2	PRJNA1014981	SAMN37355343
1611H05	sputum	2016	China: Changsha	2016CARES	2	PRJNA1014981	SAMN37355344
1611H06	sputum	2016	China: Changsha	2016CARES	2	PRJNA1014981	SAMN37355345
1611H08	sputum	2016	China: Changsha	2016CARES	2	PRJNA1014981	SAMN37355346
1611H09	sputum	2016	China: Changsha	2016CARES	2	PRJNA1014981	SAMN37355347
1611H13	sputum	2016	China: Changsha	2016CARES	2	PRJNA1014981	SAMN37355348
1611H14	sputum	2016	China: Changsha	2016CARES	2	PRJNA1014981	SAMN37355349
1611H15	sputum	2016	China: Changsha	2016CARES	2	PRJNA1014981	SAMN37355350
1611H19	sputum	2016	China: Changsha	2016CARES	2	PRJNA1014981	SAMN37355351
1611H22	sputum	2016	China: Changsha	2016CARES	2	PRJNA1014981	SAMN37355352
1611H23	sputum	2016	China: Changsha	2016CARES	2	PRJNA1014981	SAMN37355353
1611H24	sputum	2016	China: Changsha	2016CARES	2	PRJNA1014981	SAMN37355354
1611H26	sputum	2016	China: Changsha	2016CARES	2	PRJNA1014981	SAMN37355355
1611H27	sputum	2016	China: Changsha	2016CARES	2	PRJNA1014981	SAMN37355356
1611H29	broncho-alveolar lavage	2016	China: Changsha	2016CARES	2	PRJNA1014981	SAMN37355357
1611H30	sputum	2016	China: Changsha	2016CARES	2	PRJNA1014981	SAMN37355358
1611H39	sputum	2016	China: Changsha	2016CARES	2	PRJNA1014981	SAMN37355359
1612B04	blood	2016	China: Beijing	2016CARES	2	PRJNA1014981	SAMN37355360
1612B28	blood	2016	China: Beijing	2016CARES	93	PRJNA1014981	SAMN37355361
1612B52	blood	2016	China: Beijing	2016CARES	2	PRJNA1014981	SAMN37355362
1612B53	blood	2016	China: Beijing	2016CARES	2	PRJNA1014981	SAMN37355363
1612B55	blood	2016	China: Beijing	2016CARES	248	PRJNA1014981	SAMN37355364
1612B78	blood	2016	China: Beijing	2016CARES	2	PRJNA1014981	SAMN37355365
1612H04	sputum	2016	China: Beijing	2016CARES	2	PRJNA1014981	SAMN37355366
1612H05	sputum	2016	China: Beijing	2016CARES	40	PRJNA1014981	SAMN37355367
1612H06	sputum	2016	China: Beijing	2016CARES	2	PRJNA1014981	SAMN37355368
1612H07	sputum	2016	China: Beijing	2016CARES	119	PRJNA1014981	SAMN37355369
1612H09	sputum	2016	China: Beijing	2016CARES	213	PRJNA1014981	SAMN37355370
1612H11	sputum	2016	China: Beijing	2016CARES	2	PRJNA1014981	SAMN37355371
1612H13	sputum	2016	China: Beijing	2016CARES	2	PRJNA1014981	SAMN37355372
1612H15	sputum	2016	China: Beijing	2016CARES	2	PRJNA1014981	SAMN37355373
1612H16	sputum	2016	China: Beijing	2016CARES	2	PRJNA1014981	SAMN37355374
1612H17	sputum	2016	China: Beijing	2016CARES	2	PRJNA1014981	SAMN37355375
1612H18	sputum	2016	China: Beijing	2016CARES	2	PRJNA1014981	SAMN37355376
1612H20	sputum	2016	China: Beijing	2016CARES	25	PRJNA1014981	SAMN37355377
1612H21	sputum	2016	China: Beijing	2016CARES	2	PRJNA1014981	SAMN37355378
1612H26	sputum	2016	China: Beijing	2016CARES	2	PRJNA1014981	SAMN37355379
1612H27	sputum	2016	China: Beijing	2016CARES	2	PRJNA1014981	SAMN37355380
1612H28	sputum	2016	China: Beijing	2016CARES	2	PRJNA1014981	SAMN37355381
1612H32	sputum	2016	China: Beijing	2016CARES	2	PRJNA1014981	SAMN37355382
1612H34	sputum	2016	China: Beijing	2016CARES	2	PRJNA1014981	SAMN37355383
1612H37	sputum	2016	China: Beijing	2016CARES	2	PRJNA1014981	SAMN37355384
1612H38	sputum	2016	China: Beijing	2016CARES	2	PRJNA1014981	SAMN37355385
1612H48	sputum	2016	China: Beijing	2016CARES	Unknown	PRJNA1014981	SAMN37355386
1613B25	blood	2016	China: Beijing	2016CARES	2	PRJNA1014981	SAMN37355387
1613B55	blood	2016	China: Beijing	2016CARES	2	PRJNA1014981	SAMN37355388
1613B63	blood	2016	China: Beijing	2016CARES	2	PRJNA1014981	SAMN37355389
1613H05	broncho-alveolar lavage	2016	China: Beijing	2016CARES	2	PRJNA1014981	SAMN37355390
1613H06	sputum	2016	China: Beijing	2016CARES	2	PRJNA1014981	SAMN37355391
1613H24	broncho-alveolar lavage	2016	China: Beijing	2016CARES	2	PRJNA1014981	SAMN37355392
1613H25	sputum	2016	China: Beijing	2016CARES	2	PRJNA1014981	SAMN37355393
1613H26	broncho-alveolar lavage	2016	China: Beijing	2016CARES	2	PRJNA1014981	SAMN37355394
1613H29	broncho-alveolar lavage	2016	China: Beijing	2016CARES	2	PRJNA1014981	SAMN37355395
1613H31	broncho-alveolar lavage	2016	China: Beijing	2016CARES	2	PRJNA1014981	SAMN37355396
1613H35	broncho-alveolar lavage	2016	China: Beijing	2016CARES	2	PRJNA1014981	SAMN37355397
1613H37	broncho-alveolar lavage	2016	China: Beijing	2016CARES	2	PRJNA1014981	SAMN37355398
1613H43	sputum	2016	China: Beijing	2016CARES	2	PRJNA1014981	SAMN37355399
1613H46	broncho-alveolar lavage	2016	China: Beijing	2016CARES	2	PRJNA1014981	SAMN37355400
1614BY814	blood	2016	China: Wuhan	2016CARES	Unknown	PRJNA1014981	SAMN37355401
1614BY834	blood	2016	China: Wuhan	2016CARES	2	PRJNA1014981	SAMN37355402
1614H05	sputum	2016	China: Wuhan	2016CARES	2	PRJNA1014981	SAMN37355403
1614H09	sputum	2016	China: Wuhan	2016CARES	2	PRJNA1014981	SAMN37355404
1614H13	sputum	2016	China: Wuhan	2016CARES	1336	PRJNA1014981	SAMN37355405
1614H22	sputum	2016	China: Wuhan	2016CARES	1336	PRJNA1014981	SAMN37355406
1614H36	sputum	2016	China: Wuhan	2016CARES	Unknown	PRJNA1014981	SAMN37355407
1614H45	sputum	2016	China: Wuhan	2016CARES	64	PRJNA1014981	SAMN37355408
1614H50	sputum	2016	China: Wuhan	2016CARES	Unknown	PRJNA1014981	SAMN37355409
1614HY019	sputum	2016	China: Wuhan	2016CARES	2	PRJNA1014981	SAMN37355410
1614HY734	sputum	2016	China: Wuhan	2016CARES	2	PRJNA1014981	SAMN37355411
1614HY747	sputum	2016	China: Wuhan	2016CARES	2	PRJNA1014981	SAMN37355412
1614HY754	sputum	2016	China: Wuhan	2016CARES	2	PRJNA1014981	SAMN37355413
1614HY767	sputum	2016	China: Wuhan	2016CARES	Unknown	PRJNA1014981	SAMN37355414
1614HY768	sputum	2016	China: Wuhan	2016CARES	2	PRJNA1014981	SAMN37355415
1614HY799	sputum	2016	China: Wuhan	2016CARES	2	PRJNA1014981	SAMN37355416
1615B10	blood	2016	China: Jinan	2016CARES	2	PRJNA1014981	SAMN37355417
1615B13	blood	2016	China: Jinan	2016CARES	2	PRJNA1014981	SAMN37355418
1615B17	blood	2016	China: Jinan	2016CARES	2	PRJNA1014981	SAMN37355419
1615B25	blood	2016	China: Jinan	2016CARES	2	PRJNA1014981	SAMN37355420
1615B26	blood	2016	China: Jinan	2016CARES	2	PRJNA1014981	SAMN37355421
1615B47	blood	2016	China: Jinan	2016CARES	2	PRJNA1014981	SAMN37355422
1615B60	blood	2016	China: Jinan	2016CARES	2	PRJNA1014981	SAMN37355423
1615B79	blood	2016	China: Jinan	2016CARES	2	PRJNA1014981	SAMN37355424
1615H01	sputum	2016	China: Jinan	2016CARES	2	PRJNA1014981	SAMN37355425
1615H02	sputum	2016	China: Jinan	2016CARES	25	PRJNA1014981	SAMN37355426
1615H03	sputum	2016	China: Jinan	2016CARES	25	PRJNA1014981	SAMN37355427
1615H05	sputum	2016	China: Jinan	2016CARES	2	PRJNA1014981	SAMN37355428
1615H07	sputum	2016	China: Jinan	2016CARES	2	PRJNA1014981	SAMN37355429
1615H09	sputum	2016	China: Jinan	2016CARES	2	PRJNA1014981	SAMN37355430
1615H12	sputum	2016	China: Jinan	2016CARES	2	PRJNA1014981	SAMN37355431
1615H13	sputum	2016	China: Jinan	2016CARES	2	PRJNA1014981	SAMN37355432
1615H14	sputum	2016	China: Jinan	2016CARES	Unknown	PRJNA1014981	SAMN37355433
1615H18	sputum	2016	China: Jinan	2016CARES	2	PRJNA1014981	SAMN37355434
1615H22	sputum	2016	China: Jinan	2016CARES	2	PRJNA1014981	SAMN37355435
1615H23	sputum	2016	China: Jinan	2016CARES	2	PRJNA1014981	SAMN37355436
1615H25	sputum	2016	China: Jinan	2016CARES	2	PRJNA1014981	SAMN37355437
1615H26	sputum	2016	China: Jinan	2016CARES	Unknown	PRJNA1014981	SAMN37355438
1615H27	sputum	2016	China: Jinan	2016CARES	Unknown	PRJNA1014981	SAMN37355439
1615H29	sputum	2016	China: Jinan	2016CARES	2	PRJNA1014981	SAMN37355440
1615H30	sputum	2016	China: Jinan	2016CARES	2	PRJNA1014981	SAMN37355441
1615H35	sputum	2016	China: Jinan	2016CARES	2	PRJNA1014981	SAMN37355442
1615H45	sputum	2016	China: Jinan	2016CARES	2	PRJNA1014981	SAMN37355443
1615H46	sputum	2016	China: Jinan	2016CARES	2	PRJNA1014981	SAMN37355444
1615H47	sputum	2016	China: Jinan	2016CARES	2	PRJNA1014981	SAMN37355445
1615H49	sputum	2016	China: Jinan	2016CARES	2	PRJNA1014981	SAMN37355446
1615H50	sputum	2016	China: Jinan	2016CARES	2	PRJNA1014981	SAMN37355447
1801B39	blood	2018	China: Beijing	2018CARES	490	PRJNA1014981	SAMN37355448
1801H01	sputum	2018	China: Beijing	2018CARES	58	PRJNA1014981	SAMN37355449
1801H10	sputum	2018	China: Beijing	2018CARES	203	PRJNA1014981	SAMN37355450
1801H20	sputum	2018	China: Beijing	2018CARES	Unknown	PRJNA1014981	SAMN37355451
1802H03	sputum	2018	China: Guangzhou	2018CARES	2	PRJNA1014981	SAMN37355452
1802H04	sputum	2018	China: Guangzhou	2018CARES	744	PRJNA1014981	SAMN37355453
1802H06	sputum	2018	China: Guangzhou	2018CARES	2	PRJNA1014981	SAMN37355454
1802H07	sputum	2018	China: Guangzhou	2018CARES	2	PRJNA1014981	SAMN37355455
1802H08	sputum	2018	China: Guangzhou	2018CARES	2	PRJNA1014981	SAMN37355456
1802H09	sputum	2018	China: Guangzhou	2018CARES	744	PRJNA1014981	SAMN37355457
1802H10	sputum	2018	China: Guangzhou	2018CARES	Unknown	PRJNA1014981	SAMN37355458
1802H11	sputum	2018	China: Guangzhou	2018CARES	2	PRJNA1014981	SAMN37355459
1802H12	sputum	2018	China: Guangzhou	2018CARES	2	PRJNA1014981	SAMN37355460
1802H14	sputum	2018	China: Guangzhou	2018CARES	2	PRJNA1014981	SAMN37355461
1802H19	sputum	2018	China: Guangzhou	2018CARES	2	PRJNA1014981	SAMN37355462
1802H21	sputum	2018	China: Guangzhou	2018CARES	2	PRJNA1014981	SAMN37355463
1802H23	sputum	2018	China: Guangzhou	2018CARES	2	PRJNA1014981	SAMN37355464
1802H27	sputum	2018	China: Guangzhou	2018CARES	2	PRJNA1014981	SAMN37355465
1802H28	sputum	2018	China: Guangzhou	2018CARES	2	PRJNA1014981	SAMN37355466
1802H30	sputum	2018	China: Guangzhou	2018CARES	2	PRJNA1014981	SAMN37355467
1802H38	sputum	2018	China: Guangzhou	2018CARES	2	PRJNA1014981	SAMN37355468
1802H39	sputum	2018	China: Guangzhou	2018CARES	2	PRJNA1014981	SAMN37355469
1802H40	sputum	2018	China: Guangzhou	2018CARES	2	PRJNA1014981	SAMN37355470
1802H41	sputum	2018	China: Guangzhou	2018CARES	2	PRJNA1014981	SAMN37355471
1803B01	blood	2018	China: Guangzhou	2018CARES	2	PRJNA1014981	SAMN37355472
1803B03	blood	2018	China: Guangzhou	2018CARES	217	PRJNA1014981	SAMN37355473
1803B23	blood	2018	China: Guangzhou	2018CARES	218	PRJNA1014981	SAMN37355474
1803B37	blood	2018	China: Guangzhou	2018CARES	2	PRJNA1014981	SAMN37355475
1803H31	sputum	2018	China: Guangzhou	2018CARES	2	PRJNA1014981	SAMN37355476
1804B16	blood	2018	China: Shenyang	2018CARES	2	PRJNA1014981	SAMN37355477
1804B19	blood	2018	China: Shenyang	2018CARES	2	PRJNA1014981	SAMN37355478
1804B24	blood	2018	China: Shenyang	2018CARES	Unknown	PRJNA1014981	SAMN37355479
1804B30	blood	2018	China: Shenyang	2018CARES	2	PRJNA1014981	SAMN37355480
1804B44	blood	2018	China: Shenyang	2018CARES	2	PRJNA1014981	SAMN37355481
1804B60	blood	2018	China: Shenyang	2018CARES	372	PRJNA1014981	SAMN37355482
1804B63	blood	2018	China: Shenyang	2018CARES	2	PRJNA1014981	SAMN37355483
1804B78	blood	2018	China: Shenyang	2018CARES	2	PRJNA1014981	SAMN37355484
1804B79	blood	2018	China: Shenyang	2018CARES	2	PRJNA1014981	SAMN37355485
1804H06	sputum	2018	China: Shenyang	2018CARES	2	PRJNA1014981	SAMN37355486
1804H08	sputum	2018	China: Shenyang	2018CARES	2	PRJNA1014981	SAMN37355487
1804H10	sputum	2018	China: Shenyang	2018CARES	2	PRJNA1014981	SAMN37355488
1804H16	sputum	2018	China: Shenyang	2018CARES	119	PRJNA1014981	SAMN37355489
1804H21	sputum	2018	China: Shenyang	2018CARES	2	PRJNA1014981	SAMN37355490
1804H23	sputum	2018	China: Shenyang	2018CARES	2	PRJNA1014981	SAMN37355491
1804H26	sputum	2018	China: Shenyang	2018CARES	2	PRJNA1014981	SAMN37355492
1805B01	blood	2018	China: Tianjin	2018CARES	2	PRJNA1014981	SAMN37355493
1805B09	blood	2018	China: Tianjin	2018CARES	2	PRJNA1014981	SAMN37355494
1805B28	blood	2018	China: Tianjin	2018CARES	2	PRJNA1014981	SAMN37355495
1805B49	blood	2018	China: Tianjin	2018CARES	2	PRJNA1014981	SAMN37355496
1805H08	sputum	2018	China: Tianjin	2018CARES	2	PRJNA1014981	SAMN37355497
1805H14	sputum	2018	China: Tianjin	2018CARES	2	PRJNA1014981	SAMN37355498
1805H27	sputum	2018	China: Tianjin	2018CARES	93	PRJNA1014981	SAMN37355499
1805H30	sputum	2018	China: Tianjin	2018CARES	1094	PRJNA1014981	SAMN37355500
1806B13	blood	2018	China: Xi'an	2018CARES	2	PRJNA1014981	SAMN37355501
1806B26	blood	2018	China: Xi'an	2018CARES	2	PRJNA1014981	SAMN37355502
1806B34	blood	2018	China: Xi'an	2018CARES	2	PRJNA1014981	SAMN37355503
1806B41	blood	2018	China: Xi'an	2018CARES	2	PRJNA1014981	SAMN37355504
1806B43	blood	2018	China: Xi'an	2018CARES	2	PRJNA1014981	SAMN37355505
1806B60	blood	2018	China: Xi'an	2018CARES	Unknown	PRJNA1014981	SAMN37355506
1806H10	sputum	2018	China: Xi'an	2018CARES	2	PRJNA1014981	SAMN37355507
1806H15	sputum	2018	China: Xi'an	2018CARES	2	PRJNA1014981	SAMN37355508
1806H16	sputum	2018	China: Xi'an	2018CARES	2	PRJNA1014981	SAMN37355509
1806H17	sputum	2018	China: Xi'an	2018CARES	2	PRJNA1014981	SAMN37355510
1806H19	sputum	2018	China: Xi'an	2018CARES	2	PRJNA1014981	SAMN37355511
1807B06	blood	2018	China: Hangzhou	2018CARES	2	PRJNA1014981	SAMN37355512
1807B07	blood	2018	China: Hangzhou	2018CARES	410	PRJNA1014981	SAMN37355513
1807B13	blood	2018	China: Hangzhou	2018CARES	2	PRJNA1014981	SAMN37355514
1807B18	blood	2018	China: Hangzhou	2018CARES	349	PRJNA1014981	SAMN37355515
1807B25	blood	2018	China: Hangzhou	2018CARES	2	PRJNA1014981	SAMN37355516
1807B28	blood	2018	China: Hangzhou	2018CARES	2	PRJNA1014981	SAMN37355517
1807B52	blood	2018	China: Hangzhou	2018CARES	2	PRJNA1014981	SAMN37355518
1807B67	blood	2018	China: Hangzhou	2018CARES	2	PRJNA1014981	SAMN37355519
1807B69	blood	2018	China: Hangzhou	2018CARES	Unknown	PRJNA1014981	SAMN37355520
1807H03	sputum	2018	China: Hangzhou	2018CARES	2	PRJNA1014981	SAMN37355521
1807H05	sputum	2018	China: Hangzhou	2018CARES	2	PRJNA1014981	SAMN37355522
1807H06	sputum	2018	China: Hangzhou	2018CARES	217	PRJNA1014981	SAMN37355523
1807H12	sputum	2018	China: Hangzhou	2018CARES	2	PRJNA1014981	SAMN37355524
1807H22	sputum	2018	China: Hangzhou	2018CARES	2	PRJNA1014981	SAMN37355525
1807H38	sputum	2018	China: Hangzhou	2018CARES	2	PRJNA1014981	SAMN37355526
1808B17	blood	2018	China: Changsha	2018CARES	132	PRJNA1014981	SAMN37355527
1808H06	sputum	2018	China: Changsha	2018CARES	217	PRJNA1014981	SAMN37355528
1808H08	sputum	2018	China: Changsha	2018CARES	2	PRJNA1014981	SAMN37355529
1808H09	sputum	2018	China: Changsha	2018CARES	164	PRJNA1014981	SAMN37355530
1808H13	sputum	2018	China: Changsha	2018CARES	2	PRJNA1014981	SAMN37355531
1808H21	sputum	2018	China: Changsha	2018CARES	217	PRJNA1014981	SAMN37355532
1808H28	sputum	2018	China: Changsha	2018CARES	2	PRJNA1014981	SAMN37355533
1808H29	sputum	2018	China: Changsha	2018CARES	Unknown	PRJNA1014981	SAMN37355534
1810B28	blood	2018	China: Beijing	2018CARES	2	PRJNA1014981	SAMN37355535
1810H04	sputum	2018	China: Beijing	2018CARES	2	PRJNA1014981	SAMN37355536
1810H05	sputum	2018	China: Beijing	2018CARES	2	PRJNA1014981	SAMN37355537
1810H06	sputum	2018	China: Beijing	2018CARES	2	PRJNA1014981	SAMN37355538
1810H08	sputum	2018	China: Beijing	2018CARES	2	PRJNA1014981	SAMN37355539
1810H16	sputum	2018	China: Beijing	2018CARES	217	PRJNA1014981	SAMN37355540
1810H19	sputum	2018	China: Beijing	2018CARES	1418	PRJNA1014981	SAMN37355541
1810H25	sputum	2018	China: Beijing	2018CARES	1418	PRJNA1014981	SAMN37355542
1810H28	sputum	2018	China: Beijing	2018CARES	1405	PRJNA1014981	SAMN37355543
1810H30	sputum	2018	China: Beijing	2018CARES	2	PRJNA1014981	SAMN37355544
1810H35	sputum	2018	China: Beijing	2018CARES	2	PRJNA1014981	SAMN37355545
1811B09	blood	2018	China: Wuhan	2018CARES	2	PRJNA1014981	SAMN37355546
1811B10	blood	2018	China: Wuhan	2018CARES	2	PRJNA1014981	SAMN37355547
1811B40	blood	2018	China: Wuhan	2018CARES	Unknown	PRJNA1014981	SAMN37355548
1811H10	sputum	2018	China: Wuhan	2018CARES	2	PRJNA1014981	SAMN37355549
1811H14	sputum	2018	China: Wuhan	2018CARES	2	PRJNA1014981	SAMN37355550
1811H72	sputum	2018	China: Wuhan	2018CARES	2	PRJNA1014981	SAMN37355551
1811H77	sputum	2018	China: Wuhan	2018CARES	Unknown	PRJNA1014981	SAMN37355552
1811H78	sputum	2018	China: Wuhan	2018CARES	Unknown	PRJNA1014981	SAMN37355553
1811H81	sputum	2018	China: Wuhan	2018CARES	2	PRJNA1014981	SAMN37355554
1811H85	sputum	2018	China: Wuhan	2018CARES	Unknown	PRJNA1014981	SAMN37355555
1811H90	sputum	2018	China: Wuhan	2018CARES	2	PRJNA1014981	SAMN37355556
1812H02	sputum	2018	China: Jinan	2018CARES	2	PRJNA1014981	SAMN37355557
1812H06	sputum	2018	China: Jinan	2018CARES	2	PRJNA1014981	SAMN37355558
1812H14	sputum	2018	China: Jinan	2018CARES	2	PRJNA1014981	SAMN37355559
1812H21	sputum	2018	China: Jinan	2018CARES	2	PRJNA1014981	SAMN37355560
1812H22	sputum	2018	China: Jinan	2018CARES	2	PRJNA1014981	SAMN37355561
1812H30	sputum	2018	China: Jinan	2018CARES	2	PRJNA1014981	SAMN37355562
1812H36	sputum	2018	China: Jinan	2018CARES	2	PRJNA1014981	SAMN37355563
1812H41	sputum	2018	China: Jinan	2018CARES	2	PRJNA1014981	SAMN37355564
1812H42	sputum	2018	China: Jinan	2018CARES	2	PRJNA1014981	SAMN37355565
1812H43	sputum	2018	China: Jinan	2018CARES	2	PRJNA1014981	SAMN37355566

## Sheet: Independent test dataset
Table S2b. 120 A. baumannii isolates uesd for independent test.
Strain_ID	Specimen	Year	Country	Project	MLST	BioProject	BioSample
2001B52	blood	2020	China: Beijing	2020CARES	70	PRJNA1014981	SAMN37355567
2001B57	blood	2020	China: Beijing	2020CARES	334	PRJNA1014981	SAMN37355568
2001H23	sputum	2020	China: Beijing	2020CARES	63	PRJNA1014981	SAMN37355569
2002B14	blood	2020	China: Guangzhou	2020CARES	2	PRJNA1014981	SAMN37355570
2002H04	sputum	2020	China: Guangzhou	2020CARES	2	PRJNA1014981	SAMN37355571
2003B44	blood	2020	China: Guangzhou	2020CARES	2	PRJNA1014981	SAMN37355572
2003B45	blood	2020	China: Guangzhou	2020CARES	2	PRJNA1014981	SAMN37355573
2003H04	sputum	2020	China: Guangzhou	2020CARES	2	PRJNA1014981	SAMN37355574
2004B08	blood	2020	China: Shenyang	2020CARES	2	PRJNA1014981	SAMN37355575
2004H30	sputum	2021	China: Shenyang	2021CARES	2	PRJNA1014981	SAMN37355576
2004H34	sputum	2021	China: Shenyang	2021CARES	2	PRJNA1014981	SAMN37355577
2004H38	sputum	2021	China: Shenyang	2021CARES	2	PRJNA1014981	SAMN37355578
2005B09	blood	2020	China: Tianjin	2020CARES	1094	PRJNA1014981	SAMN37355579
2005B57	blood	2020	China: Tianjin	2020CARES	1336	PRJNA1014981	SAMN37355580
2005H10	sputum	2020	China: Tianjin	2020CARES	2	PRJNA1014981	SAMN37355581
2006H11	sputum	2021	China: Xi'an	2021CARES	2	PRJNA1014981	SAMN37355582
2006H27	sputum	2021	China: Xi'an	2021CARES	2	PRJNA1014981	SAMN37355583
2006H36	sputum	2021	China: Xi'an	2021CARES	2	PRJNA1014981	SAMN37355584
2007B71	blood	2021	China: Hangzhou	2021CARES	Unknown	PRJNA1014981	SAMN37355585
2009H06	sputum	2021	China: Beijing	2021CARES	132	PRJNA1014981	SAMN37355586
2009H09	sputum	2021	China: Beijing	2021CARES	40	PRJNA1014981	SAMN37355587
2009H11	sputum	2021	China: Beijing	2021CARES	2	PRJNA1014981	SAMN37355588
2010B36	blood	2021	China: Wuhan	2021CARES	2	PRJNA1014981	SAMN37355589
2010H34	sputum	2021	China: Wuhan	2021CARES	Unknown	PRJNA1014981	SAMN37355590
2010H50	sputum	2021	China: Wuhan	2021CARES	2	PRJNA1014981	SAMN37355591
2010H62	sputum	2021	China: Wuhan	2021CARES	2	PRJNA1014981	SAMN37355592
2011A01	abdominal fluid	2020	China: Jinan	2020CARES	1641	PRJNA1014981	SAMN37355593
2011B50	blood	2020	China: Jinan	2020CARES	2	PRJNA1014981	SAMN37355594
2011B62	blood	2020	China: Jinan	2020CARES	2	PRJNA1014981	SAMN37355595
2011H03	sputum	2020	China: Jinan	2020CARES	2	PRJNA1014981	SAMN37355596
A4294106-1	secretion	2017	China: Beijing	2017PKUPH	2	PRJNA1014981	SAMN37355597
A4294106-2	sputum	2017	China: Beijing	2017PKUPH	2	PRJNA1014981	SAMN37355599
A4294106-3	drain	2017	China: Beijing	2017PKUPH	2	PRJNA1014981	SAMN37355600
A4294106-4	blood	2017	China: Beijing	2017PKUPH	2	PRJNA1014981	SAMN37355601
A4316057-1	bronchial	2018	China: Beijing	2018PKUPH	1555	PRJNA1014981	SAMN37355607
A4316057-2	bronchial	2018	China: Beijing	2018PKUPH	1555	PRJNA1014981	SAMN37355614
A4316057-3	bronchial	2018	China: Beijing	2018PKUPH	1555	PRJNA1014981	SAMN37355615
A4316057-4	bronchial	2018	China: Beijing	2018PKUPH	2	PRJNA1014981	SAMN37355616
A4338474-1	blood	2019	China: Beijing	2019PKUPH	2	PRJNA1014981	SAMN37355624
A4338474-2	blood	2019	China: Beijing	2019PKUPH	2	PRJNA1014981	SAMN37355631
A4338474-3	blood	2019	China: Beijing	2019PKUPH	2	PRJNA1014981	SAMN37355632
A4338474-4	blood	2019	China: Beijing	2019PKUPH	2	PRJNA1014981	SAMN37355633
BJ16085	blood	2016	China: Beijing	2016CMSS	2	PRJNA1014981	SAMN37355639
BJ16092	blood	2016	China: Beijing	2016CMSS	2	PRJNA1014981	SAMN37355640
BJ16097	blood	2016	China: Beijing	2016CMSS	2	PRJNA1014981	SAMN37355641
GDZ16087	blood	2016	China: Guangzhou	2016CMSS	2	PRJNA1014981	SAMN37355642
GDZ16095	sputum	2016	China: Guangzhou	2016CMSS	2	PRJNA1014981	SAMN37355643
GDZ16099	blood	2016	China: Guangzhou	2016CMSS	2	PRJNA1014981	SAMN37355644
HEB18091	pus	2018	China: Harbin	2018CMSS	2	PRJNA1014981	SAMN37355645
HEB18094	abdominal fluid	2018	China: Harbin	2018CMSS	2	PRJNA1014981	SAMN37355646
SH16061	sputum	2016	China: Shanghai	2016CMSS	2	PRJNA1014981	SAMN37355647
SY16087	blood	2016	China: Shenyang	2016CMSS	2	PRJNA1014981	SAMN37355648
SY16088	cerebrospinal fluid	2016	China: Shenyang	2016CMSS	2	PRJNA1014981	SAMN37355649
SY16090	blood	2016	China: Shenyang	2016CMSS	2	PRJNA1014981	SAMN37355650
WH18075	abdominal fluid	2018	China: Wuhan	2018CMSS	2	PRJNA1014981	SAMN37355651
XJ16115	blood	2016	China: Urumqi	2016CMSS	2	PRJNA1014981	SAMN37355652
XJ16120	secretion	2016	China: Urumqi	2016CMSS	2	PRJNA1014981	SAMN37355653
ZJ16087	blood	2016	China: Hangzhou	2016CMSS	2	PRJNA1014981	SAMN37355654
ZJ16093	blood	2016	China: Hangzhou	2016CMSS	2	PRJNA1014981	SAMN37355655
ZJ18087	blood	2018	China: Hangzhou	2018CMSS	2	PRJNA1014981	SAMN37355656
AR_0033	NA	2016	NA	Public	85	PRJNA292904	SAMN04014874
AR_0035	NA	2016	NA	Public	2	PRJNA292904	SAMN04014876
AR_0036	NA	2016	NA	Public	79	PRJNA292904	SAMN04014877
AR_0037	NA	2016	NA	Public	85	PRJNA292904	SAMN04014878
AR_0045	NA	2016	NA	Public	1	PRJNA292904	SAMN04014886
AR_0063	NA	2016	NA	Public	79	PRJNA292904	SAMN04014904
AR_0078	NA	2016	NA	Public	229	PRJNA292904	SAMN04014919
AR_0083	NA	2016	NA	Public	1	PRJNA292904	SAMN04014924
AR_0088	NA	2016	NA	Public	25	PRJNA292904	SAMN04014929
AR_0101	NA	2016	NA	Public	79	PRJNA292904	SAMN04014942
AR_0102	NA	2016	NA	Public	2	PRJNA292904	SAMN04014943
ARLG-1775	urine	2007	USA: Unknown	Public	79	PRJNA384065	SAMN06827878
ARLG-1777	wound	2007	USA: Unknown	Public	406	PRJNA384065	SAMN06827876
ARLG-1788	blood	2008	USA: Unknown	Public	406	PRJNA384065	SAMN06827877
ARLG-1818	sputum	2009	USA: Unknown	Public	2	PRJNA384065	SAMN06827909
ARLG-1854	NA	2017	USA: Unknown	Public	2	PRJNA384065	SAMN06827875
ARLG-1860	NA	2017	USA: Unknown	Public	79	PRJNA384065	SAMN06827873
ARLG-1894	NA	2017	USA: Unknown	Public	2	PRJNA384065	SAMN06827872
ARLG-1912	NA	2017	USA: Unknown	Public	2	PRJNA384065	SAMN06827910
ARLG-1915	NA	2017	USA: Unknown	Public	2	PRJNA384065	SAMN06827874
FDA-CDC-AR_0273	NA	2016	NA	Public	2	PRJNA317141	SAMN04901663
FDA-CDC-AR_0274	NA	2016	NA	Public	2	PRJNA317141	SAMN04901664
FDA-CDC-AR_0275	NA	2016	NA	Public	2	PRJNA317141	SAMN04901665
FDA-CDC-AR_0277	NA	2016	NA	Public	79	PRJNA317141	SAMN04901667
FDA-CDC-AR_0278	NA	2016	NA	Public	2	PRJNA317141	SAMN04901668
FDA-CDC-AR_0279	NA	2016	NA	Public	2	PRJNA317141	SAMN04901669
FDA-CDC-AR_0280	NA	2016	NA	Public	2	PRJNA317141	SAMN04901670
FDA-CDC-AR_0281	NA	2016	NA	Public	2	PRJNA317141	SAMN04901671
FDA-CDC-AR_0282	NA	2016	NA	Public	2	PRJNA317141	SAMN04901672
FDA-CDC-AR_0283	NA	2016	NA	Public	2	PRJNA317141	SAMN04901673
FDA-CDC-AR_0284	NA	2016	NA	Public	79	PRJNA317141	SAMN04901674
FDA-CDC-AR_0285	NA	2016	NA	Public	79	PRJNA317141	SAMN04901675
FDA-CDC-AR_0286	NA	2016	NA	Public	2	PRJNA317141	SAMN04901676
FDA-CDC-AR_0287	NA	2016	NA	Public	2	PRJNA317141	SAMN04901677
FDA-CDC-AR_0288	NA	2016	NA	Public	2	PRJNA317141	SAMN04901678
FDA-CDC-AR_0289	NA	2016	NA	Public	2	PRJNA317141	SAMN04901679
FDA-CDC-AR_0290	NA	2016	NA	Public	2	PRJNA317141	SAMN04901680
FDA-CDC-AR_0291	NA	2016	NA	Public	2	PRJNA317141	SAMN04901681
FDA-CDC-AR_0292	NA	2016	NA	Public	2	PRJNA317141	SAMN04901682
FDA-CDC-AR_0293	NA	2016	NA	Public	2	PRJNA317141	SAMN04901683
FDA-CDC-AR_0294	NA	2016	NA	Public	79	PRJNA317141	SAMN04901684
FDA-CDC-AR_0295	NA	2016	NA	Public	2	PRJNA317141	SAMN04901685
FDA-CDC-AR_0296	NA	2016	NA	Public	1091	PRJNA317141	SAMN04901686
FDA-CDC-AR_0297	NA	2016	NA	Public	2	PRJNA317141	SAMN04901687
FDA-CDC-AR_0298	NA	2016	NA	Public	2	PRJNA317141	SAMN04901688
FDA-CDC-AR_0299	NA	2016	NA	Public	149	PRJNA317141	SAMN04901689
FDA-CDC-AR_0300	NA	2016	NA	Public	2	PRJNA317141	SAMN04901690
FDA-CDC-AR_0301	NA	2016	NA	Public	2	PRJNA317141	SAMN04901691
FDA-CDC-AR_0302	NA	2016	NA	Public	2	PRJNA317141	SAMN04901692
FDA-CDC-AR_0303	NA	2016	NA	Public	2	PRJNA317141	SAMN04901693
FDA-CDC-AR_0304	NA	2016	NA	Public	2	PRJNA317141	SAMN04901694
FDA-CDC-AR_0305	NA	2016	NA	Public	79	PRJNA317141	SAMN04901695
FDA-CDC-AR_0306	NA	2016	NA	Public	79	PRJNA317141	SAMN04901696
FDA-CDC-AR_0307	NA	2016	NA	Public	2	PRJNA317141	SAMN04901697
FDA-CDC-AR_0308	NA	2016	NA	Public	2	PRJNA317141	SAMN04901698
FDA-CDC-AR_0309	NA	2016	NA	Public	2	PRJNA317141	SAMN04901699
FDA-CDC-AR_0310	NA	2016	NA	Public	2	PRJNA317141	SAMN04901700
FDA-CDC-AR_0311	NA	2016	NA	Public	2	PRJNA317141	SAMN04901701
FDA-CDC-AR_0312	NA	2016	NA	Public	19	PRJNA317141	SAMN04901702
FDA-CDC-AR_0313	NA	2016	NA	Public	1	PRJNA317141	SAMN04901703
