# Supplementary material for: Machine learning and feature extraction for rapid antimicrobial resistance prediction of Acinetobacter baumannii from whole-genome sequencing data
Source: Front Microbiol. 2024 Jan 11;14:1320312. doi: 10.3389/fmicb.2023.1320312 (PMC10808480; doi:10.3389/fmicb.2023.1320312)
Supplement: Supplementary file 4 [file Table_3.XLSX]

## Sheet: Model construction dataset
Table S3a. The MICs of 13 antimicrobial agents for 339 A. baumannii isolates of model construction dataset.
Strain_ID	IPM	MEM	CST	TGC	FEP	CAZ	CSL	TZP	AMK	CIP	LVX	MIN	SXT
1601B17	128	64	1	2	64	64	64	>256	>256	>32	16	16	>64
1601B19	128	64	1	2	256	>256	64	>256	>256	>32	8	4	1
1601B31	128	64	1	2	256	>256	64	>256	4	>32	32	4	32
1601B43	128	64	1	2	32	64	32	>256	>256	>32	16	8	>64
1601B56	128	64	1	1	128	128	64	>256	>256	>32	32	1	4
1601B80	32	8	0.5	0.5	8	4	16	256	4	0.25	0.25	0.125	0.5
1601H03	128	64	1	1	256	>256	>256	>256	>256	>32	8	4	1
1601H04	0.25	0.25	1	0.25	1	2	2	<=0.016	4	0.125	0.125	0.25	0.25
1601H07	64	64	1	1	256	>256	128	>256	>256	>32	8	4	0.5
1601H10	0.25	0.125	1	<=0.125	1	2	2	<=0.016	2	0.125	0.125	0.25	0.25
1601H13	64	32	1	1	>256	>256	64	>256	>256	>32	8	4	0.5
1601H15	>256	64	1	1	32	128	64	128	128	1	1	0.5	0.5
1601H17	0.25	0.125	1	<=0.125	1	2	2	<=0.016	4	0.125	0.125	0.25	0.25
1601H18	64	16	1	0.5	32	128	64	256	>256	>32	8	8	>64
1601H23	64	32	1	4	64	128	64	256	>256	>32	>32	1	4
1601H26	0.5	0.25	1	0.25	1	2	4	0.25	4	0.25	0.125	0.125	0.5
1601H37	128	64	1	1	256	>256	128	>256	>256	>32	8	4	1
1601H43	64	32	1	1	32	256	64	>256	>256	>32	16	2	8
1601H50	128	64	1	2	64	64	128	>256	>256	>32	16	16	>64
1605B20	32	32	1	2	128	>256	>256	>256	>256	>32	8	4	1
1605B24	64	64	1	2	128	>256	128	>256	>256	>32	8	8	32
1605B80	128	64	1	1	128	>256	64	>256	>256	>32	32	8	4
1605H01	32	16	1	1	64	>256	64	256	>256	>32	8	4	1
1605H05	32	16	1	2	64	128	64	256	>256	>32	16	16	64
1605H06	128	64	1	0.25	256	>256	64	>256	>256	16	4	4	4
1605H09	128	64	<=0.064	2	256	>256	64	>256	2	>32	16	16	32
1605H10	128	64	1	1	128	64	64	>256	2	>32	16	8	2
1605H11	64	64	1	1	128	>256	64	>256	>256	>32	>32	4	16
1605H13	64	64	1	2	64	256	64	256	>256	>32	16	32	4
1605H14	64	32	1	2	64	256	64	256	>256	>32	32	16	1
1605H18	32	16	0.5	<=0.125	>256	>256	128	256	>256	32	4	2	>64
1605H19	64	32	1	2	128	128	64	>256	>256	>32	16	16	>64
1605H21	32	32	1	2	64	>256	64	>256	>256	>32	16	16	32
1605H23	64	32	1	1	128	>256	128	>256	>256	>32	32	4	64
1605H25	32	8	2	<=0.125	16	128	32	256	>256	16	4	0.5	16
1605H27	128	32	1	1	256	>256	128	>256	>256	>32	32	8	64
1605H31	128	32	1	2	256	>256	128	>256	>256	>32	32	8	>64
1606B21	0.25	0.125	1	<=0.125	2	4	2	<=0.016	2	0.125	0.125	0.125	0.125
1606B35	128	64	0.5	1	256	>256	128	>256	>256	>32	8	4	64
1606B38	0.25	0.25	1	0.5	2	2	4	8	2	0.25	0.25	0.125	0.25
1606B44	128	64	1	2	128	128	32	>256	>256	>32	16	16	8
1606H34	128	64	1	1	128	>256	8	>256	>256	>32	16	4	32
1606H35	8	8	1	1	32	128	32	128	>256	>32	16	4	>64
1606H36	0.25	0.25	1	0.25	2	4	32	0.5	2	1	1	0.25	0.25
1606H37	128	64	1	1	128	>256	128	>256	>256	>32	32	4	>64
1606H38	64	64	1	1	128	>256	64	>256	>256	32	8	8	4
1606H39	32	16	0.5	8	64	256	32	128	>256	>32	32	8	1
1606H40	4	4	<=0.064	1	16	128	32	128	2	>32	16	4	64
1606H41	128	32	1	1	64	128	64	>256	>256	>32	16	16	2
1606H42	0.125	<=0.016	0.5	<=0.125	1	4	4	1	16	1	1	8	>64
1606H43	128	64	1	8	>256	>256	64	>256	>256	>32	16	8	64
1607B46	0.25	0.5	1	<=0.125	2	2	16	0.064	4	0.125	0.125	0.125	0.125
1607B52	0.5	0.25	0.5	<=0.125	1	2	16	<=0.016	1	0.125	0.064	0.032	0.25
1607B62	128	32	1	0.25	128	>256	32	64	8	32	8	0.125	4
1608B43	0.25	0.25	0.5	<=0.125	2	4	4	0.064	4	0.25	0.125	0.064	0.125
1608B63	0.5	0.25	0.5	0.25	2	4	4	2	2	0.25	0.125	0.064	0.25
1608H18	32	16	2	1	64	>256	64	>256	>256	32	8	4	1
1608H26	128	64	0.5	2	128	>256	64	>256	2	32	16	16	16
1608H34	0.25	0.125	1	<=0.125	0.5	1	2	<=0.016	2	0.125	0.032	0.064	0.25
1608H46	128	32	1	1	64	64	64	>256	>256	>32	8	8	>64
1609B77	64	32	1	1	64	128	32	256	4	32	8	0.5	4
1609H16	16	8	0.5	2	64	>256	64	128	4	>32	16	4	2
1609H17	128	64	0.5	0.5	64	128	32	>256	>256	16	4	4	4
1609H22	128	64	1	1	>256	>256	64	>256	>256	>32	8	8	64
1609H33	0.25	0.25	1	<=0.125	2	4	4	1	2	0.125	0.125	0.125	0.25
1609H34	0.25	0.25	2	0.125	0.5	1	2	<=0.016	4	0.064	0.064	0.125	NA
1609H47	32	16	1	1	32	64	32	256	>256	>32	8	16	64
1610B02	32	8	1	1	64	16	32	256	256	16	4	32	64
1610B03	0.25	0.125	1	<=0.125	2	4	4	1	2	0.125	0.125	0.064	0.125
1610B04	32	16	1	4	32	16	32	256	256	16	4	32	64
1610B05	64	32	1	2	32	64	32	>256	>256	>32	16	2	16
1610B06	64	32	1	1	64	>256	32	>256	>256	32	8	4	32
1610B08	32	8	1	1	32	16	32	256	128	16	4	32	64
1610B10	64	16	1	2	32	64	32	256	>256	32	8	0.5	>64
1610B11	32	16	1	2	64	64	2	256	4	>32	8	16	>64
1610B19	32	16	1	2	64	>256	128	256	>256	>32	16	8	1
1610B20	64	32	0.25	2	64	128	32	>256	>256	>32	16	16	>64
1610B28	64	32	1	2	>256	>256	32	256	>256	32	8	8	>64
1610B31	128	32	1	2	64	64	32	>256	>256	>32	32	16	>64
1610B32	64	64	1	2	>256	>256	32	256	>256	32	8	8	4
1610B33	64	32	1	2	64	128	32	256	8	32	8	1	>64
1610B34	64	64	1	2	64	>256	32	256	>256	>32	32	8	1
1610B35	128	64	1	2	128	64	64	>256	>256	>32	8	0.5	>64
1610B36	32	16	0.5	2	64	>256	32	256	>256	>32	16	4	1
1610B37	64	32	0.5	1	64	256	64	256	>32	>32	8	1	>64
1610B39	16	8	1	4	32	16	16	128	2	32	8	4	1
1610B41	64	64	1	1	64	64	32	>256	>32	>32	16	8	>64
1610B42	32	32	1	1	64	>256	32	>256	>32	>32	32	8	1
1610B44	32	16	1	1	32	64	32	256	>32	32	8	0.5	>64
1610B47	32	16	1	2	32	64	32	256	4	>32	16	16	64
1610B55	64	16	1	1	64	64	64	256	>32	>32	8	0.5	>64
1610B63	128	128	1	2	256	256	64	>256	>256	>32	16	16	2
1610B66	4	4	1	2	64	128	16	128	>256	>32	16	16	>64
1610B67	64	32	1	2	128	>256	32	>256	>256	>32	8	8	64
1610B74	64	32	1	1	128	>256	32	>256	>256	>32	8	4	64
1610B78	64	32	1	1	32	128	32	256	4	>32	8	0.5	>64
1610B80	128	64	1	8	128	64	64	>256	1	>32	16	8	16
1610H07	128	16	1	2	64	64	64	256	>256	>32	16	2	4
1610H10	0.25	0.25	2	0.25	4	4	2	<=0.016	4	0.25	0.125	0.25	0.125
1610H15	64	32	1	1	64	128	32	256	>32	32	8	1	>64
1610H24	64	32	1	2	64	64	32	>256	>32	>32	8	16	>64
1610H26	0.5	0.125	1	<=0.125	1	2	2	<=0.016	2	0.125	0.064	0.064	0.5
1610H27	64	32	1	2	64	128	32	>256	>32	>32	8	16	>64
1610H30	4	8	1	2	32	128	16	128	>32	>32	16	16	>64
1610H31	64	32	1	2	64	8	32	256	2	32	4	2	4
1610H38	32	16	2	0.5	32	2	16	128	8	16	4	1	4
1610H41	128	32	0.5	1	64	>256	64	256	>32	>32	32	8	>64
1610H44	>32	16	2	2	32	64	64	128	8	64	16	16	NA
1610H46	32	16	1	1	64	>256	32	256	>32	>32	16	4	>64
1610H48	64	32	1	1	128	>256	32	>256	>32	32	4	4	32
1610H50	32	16	1	1	128	64	32	>256	2	16	4	32	64
1611B05	64	32	1	2	32	64	32	256	>32	>32	16	16	>64
1611B29	16	8	2	2	128	>256	64	256	>256	32	8	4	NA
1611B61	32	16	0.5	<=0.125	64	>256	32	256	>32	>32	16	16	>64
1611H01	32	16	1	8	64	256	32	256	>32	>32	32	16	2
1611H03	128	64	0.5	2	256	>256	64	>256	>32	>32	16	16	>64
1611H05	32	32	1	4	128	256	64	256	>32	>32	16	16	2
1611H06	32	32	1	8	256	>256	64	256	>32	>32	32	16	1
1611H08	128	128	0.5	1	>256	>256	64	>256	>32	>32	16	8	1
1611H09	32	16	1	2	64	>256	32	256	>32	>32	16	16	>64
1611H13	32	16	1	2	64	>256	32	>256	>32	>32	8	8	1
1611H14	64	64	1	4	128	256	64	>256	>32	>32	32	32	>64
1611H15	64	64	1	2	128	>256	32	>256	>32	32	8	8	8
1611H19	64	32	1	4	128	256	64	256	>32	>32	16	16	>64
1611H22	32	16	1	2	64	>256	64	256	>32	>32	8	8	1
1611H23	32	32	1	2	64	>256	64	>256	>32	>32	8	8	1
1611H24	32	16	1	2	64	>256	64	256	>32	>32	8	4	1
1611H26	128	32	1	2	128	>256	64	>256	>256	>32	16	16	>64
1611H27	32	16	1	2	32	128	64	256	>256	>32	16	16	>64
1611H29	64	64	0.5	1	256	>256	128	>256	>256	>32	16	16	>64
1611H30	32	16	1	2	128	128	128	>256	>256	>32	16	16	>64
1611H39	32	16	1	0.5	128	>256	128	256	>256	>32	8	4	4
1612B04	64	32	1	2	128	128	32	>256	>256	>32	16	16	>64
1612B28	0.25	0.25	2	<=0.125	1	4	4	4	4	0.125	0.125	0.032	0.125
1612B52	64	32	1	2	64	64	32	256	>256	>32	16	16	>64
1612B53	64	32	1	2	64	128	128	>256	>256	>32	16	16	>64
1612B55	16	8	1	0.5	8	8	16	256	16	32	8	0.25	8
1612B78	64	64	1	1	64	128	32	256	4	32	8	1	64
1612H04	64	64	1	2	256	256	128	>256	>256	>32	32	16	>64
1612H05	0.25	0.25	1	<=0.125	2	4	4	1	2	0.25	0.125	0.125	0.5
1612H06	64	64	1	1	256	128	64	>256	>256	32	8	8	>64
1612H07	0.25	0.25	0.5	<=0.125	2	4	4	0.064	4	0.125	0.125	0.125	0.5
1612H09	0.25	0.25	1	1	2	4	4	1	4	0.5	0.25	0.25	0.5
1612H11	64	32	1	1	64	128	32	>256	>256	>32	8	8	>64
1612H13	64	64	1	2	256	>256	64	>256	>256	>32	8	8	>64
1612H15	64	32	1	16	64	>256	128	>256	>256	>32	32	32	>64
1612H16	32	16	1	2	32	256	128	256	>256	>32	16	16	>64
1612H17	128	64	1	4	64	256	128	>256	4	>32	16	16	>64
1612H18	64	64	0.5	1	64	64	32	256	>256	>32	16	8	>64
1612H20	0.25	0.25	0.5	0.5	2	4	8	2	32	>32	16	1	64
1612H21	32	32	1	1	64	128	64	>256	>256	>32	16	16	>64
1612H26	64	32	1	2	64	128	32	>256	>256	>32	16	16	>64
1612H27	128	64	1	1	64	128	64	>256	>256	>32	8	8	>64
1612H28	128	64	1	2	64	128	64	>256	>256	>32	16	16	>64
1612H32	64	64	1	2	64	128	32	256	>256	>32	8	8	>64
1612H34	64	32	1	1	64	64	64	>256	>256	>32	32	16	>64
1612H37	>32	>32	2	2	64	128	128	>256	>256	32	8	8	NA
1612H38	64	32	1	1	64	128	32	>256	>256	>32	16	16	>64
1612H48	0.25	0.25	1	<=0.125	2	4	4	1	4	0.25	0.125	0.125	0.25
1613B25	128	64	1	1	128	>256	128	>256	>256	>32	8	8	1
1613B55	64	64	2	8	64	64	32	>256	>256	>32	32	16	>64
1613B63	128	64	1	2	256	>256	128	>256	>256	>32	8	8	>64
1613H05	64	16	0.5	8	32	256	16	128	>256	>32	8	8	0.5
1613H06	128	64	0.5	2	>256	>256	128	>256	>256	>32	16	8	1
1613H24	128	64	0.5	4	64	64	32	>256	>256	>32	32	16	>64
1613H25	128	64	1	4	64	128	32	256	>256	>32	16	16	>64
1613H26	128	64	1	1	>256	>256	128	>256	>256	>32	8	2	64
1613H29	64	64	1	2	128	>256	128	>256	>256	>32	8	8	1
1613H31	64	32	1	1	32	128	64	256	>256	>32	16	16	>64
1613H35	64	32	2	4	256	>256	256	>256	>256	>32	16	16	>64
1613H37	2	4	1	2	32	128	64	128	>256	>32	16	16	>64
1613H43	64	64	1	4	256	>256	64	>256	>256	>32	8	8	>64
1613H46	2	2	1	2	32	64	32	128	>256	>32	16	16	>64
1614BY814	256	32	0.5	1	32	4	16	16	64	2	1	0.5	4
1614BY834	64	64	1	2	64	128	64	>256	>256	>32	8	8	>64
1614H05	64	32	1	1	64	128	32	>256	>256	>32	8	8	32
1614H09	0.25	0.032	0.5	0.5	0.064	4	1	4	1	0.032	0.125	4	32
1614H13	0.25	0.25	1	<=0.125	4	8	4	2	4	0.25	0.125	0.125	0.25
1614H22	0.25	0.25	1	<=0.125	2	8	4	2	2	0.125	0.125	0.125	0.25
1614H36	0.5	0.125	1	<=0.125	2	4	4	1	2	0.125	0.064	0.064	0.125
1614H45	0.25	0.5	0.5	<=0.125	4	4	4	8	2	0.25	0.125	0.125	0.25
1614H50	0.5	0.25	0.5	<=0.125	2	4	4	1	2	0.125	0.125	0.064	0.25
1614HY019	128	64	1	2	128	128	32	>256	4	>32	4	4	64
1614HY734	64	32	1	2	64	128	32	>256	>256	>32	4	4	>64
1614HY747	64	32	1	1	64	128	64	>256	>256	>32	8	4	>64
1614HY754	64	32	1	2	64	128	32	>256	>256	>32	8	4	>64
1614HY767	16	2	2	2	4	2	64	2	64	2	2	4	1
1614HY768	64	16	1	2	64	128	32	>256	>256	>32	8	4	>64
1614HY799	64	16	1	2	64	128	64	>256	>256	>32	8	16	>64
1615B10	64	16	2	1	32	64	64	256	>256	>32	16	2	>64
1615B13	64	32	1	1	64	64	32	256	>256	32	8	16	>64
1615B17	32	16	1	1	64	128	64	>256	8	>32	32	4	2
1615B25	128	64	1	4	64	64	64	>256	>256	>32	16	16	>64
1615B26	128	128	0.5	2	128	>256	32	>256	>256	>32	16	16	2
1615B47	64	32	1	1	32	128	32	>256	>256	>32	8	8	>64
1615B60	64	32	1	8	128	128	64	>256	>256	>32	32	16	>64
1615B79	128	64	1	2	256	128	64	>256	>256	>32	16	16	4
1615H01	128	64	1	2	64	128	64	>256	4	>32	32	16	4
1615H02	32	32	1	0.25	256	>256	64	256	>256	>32	16	16	>64
1615H03	0.25	<=0.016	1	2	0.064	0.5	4	2	1	0.125	0.25	4	64
1615H05	64	32	0.5	1	32	32	16	256	>256	16	8	8	4
1615H07	64	32	1	1	64	64	>256	>256	2	>32	16	2	4
1615H09	64	32	1	2	64	128	32	256	>256	32	8	16	>64
1615H12	64	16	1	1	64	64	64	256	>256	>32	16	4	>64
1615H13	16	8	1	1	64	64	32	256	>256	>32	32	2	>64
1615H14	32	32	0.5	2	128	>256	>256	>256	>256	>32	>32	32	>64
1615H18	64	64	1	2	64	>256	64	256	>256	>32	32	16	>64
1615H22	128	32	0.5	2	64	>256	64	>256	>256	>32	32	16	>64
1615H23	64	64	2	2	128	128	64	>256	2	>32	16	16	4
1615H25	128	32	0.5	2	32	64	32	256	>256	32	8	16	4
1615H26	0.25	0.125	1	<=0.125	1	4	4	<=0.016	4	0.125	0.064	0.064	0.064
1615H27	1	1	0.5	1	8	256	128	8	1	0.5	1	1	>64
1615H29	128	32	1	2	64	64	64	256	>256	>32	16	8	>64
1615H30	32	16	1	1	64	64	128	>256	2	>32	16	4	4
1615H35	128	32	1	1	>256	128	256	>256	4	>32	16	8	1
1615H45	16	8	1	1	32	64	64	256	>256	>32	32	2	>64
1615H46	128	64	2	1	64	128	64	>256	2	>32	16	16	4
1615H47	128	32	1	2	64	128	64	>256	2	>32	16	8	4
1615H49	128	128	1	1	256	128	64	>256	4	>32	8	1	>64
1615H50	64	16	1	1	32	64	64	256	>256	>32	16	2	>64
1801B39	0.5	0.25	0.125	0.125	4	2	2	<=0.016	4	0.064	0.064	0.064	0.125
1801H01	0.25	1	0.25	0.5	4	2	2	<=0.016	4	0.125	0.125	0.125	0.125
1801H10	0.25	0.5	0.5	2	4	2	2	<=0.016	4	0.125	0.125	0.125	0.125
1801H20	0.5	0.5	0.5	1	4	4	2	2	4	0.125	0.064	0.064	0.125
1802H03	32	32	0.25	2	64	128	32	256	>256	>64	64	32	>64
1802H04	0.25	0.5	0.5	1	4	2	2	<=0.016	4	0.125	0.125	0.064	0.125
1802H06	32	>32	0.25	2	256	128	32	>256	>256	>64	32	8	>64
1802H07	>32	>32	0.25	2	>256	>256	64	>256	>256	>64	32	16	16
1802H08	>32	>32	0.25	0.125	>256	>256	64	>256	>256	8	2	1	16
1802H09	>32	>32	0.25	2	>256	>256	64	>256	>256	>64	32	16	>64
1802H10	0.25	0.25	0.125	0.25	64	2	2	256	4	0.125	0.125	4	0.25
1802H11	>32	>32	0.25	2	>256	>256	64	>256	>256	>64	32	16	16
1802H12	>32	>32	0.25	1	256	>256	64	>256	8	>64	32	8	16
1802H14	>32	>32	0.25	2	>256	>256	64	>256	>256	>64	32	16	>64
1802H19	>32	>32	0.125	2	>256	>256	64	>256	>256	>64	32	8	16
1802H21	>32	>32	0.25	2	>256	128	32	>256	>256	>64	16	16	>64
1802H23	32	32	0.25	2	256	>256	32	256	>256	32	8	8	0.5
1802H27	>32	>32	0.25	2	>256	>256	64	>256	>256	>64	32	16	16
1802H28	32	32	0.25	2	256	>256	64	>256	>256	32	8	8	>64
1802H30	32	>32	0.25	2	64	128	64	256	>256	>64	64	32	>64
1802H38	32	16	0.25	2	64	128	32	128	>256	>64	64	32	>64
1802H39	>32	>32	0.25	2	256	128	128	>256	>256	64	16	16	2
1802H40	>32	>32	0.25	2	>256	>256	64	>256	>256	>64	32	8	1
1802H41	>32	>32	1	2	256	>256	32	>256	>256	>64	32	4	1
1803B01	32	32	0.25	2	256	>256	64	>256	>256	>64	16	16	16
1803B03	0.25	0.5	0.5	0.125	4	4	1	<=0.016	4	0.125	0.125	0.125	0.25
1803B23	0.5	0.5	0.25	0.125	4	4	4	2	4	0.125	0.064	0.125	0.064
1803B37	>32	>32	0.25	2	>256	>256	128	>256	>256	>64	16	16	>64
1803H31	>32	>32	0.25	2	128	128	128	>256	>256	64	8	8	2
1804B16	0.125	0.032	0.125	0.125	32	8	32	4	>256	>64	64	2	>64
1804B19	>32	>32	0.5	2	256	256	128	>256	>256	64	8	8	32
1804B24	0.25	0.5	0.5	1	4	4	1	<=0.016	4	0.125	0.125	0.125	0.064
1804B30	32	>32	2	2	>256	>256	32	>256	>256	>64	8	8	1
1804B44	32	32	0.25	1	256	128	128	>256	>256	32	8	4	>64
1804B60	0.25	0.25	0.25	0.5	4	4	1	8	4	0.064	0.064	0.064	0.25
1804B63	>32	>32	0.25	1	256	>256	128	>256	>256	64	16	16	2
1804B78	32	32	0.25	1	256	128	128	>256	8	32	8	8	1
1804B79	>32	>32	0.25	1	256	>256	32	>256	>256	64	16	4	>64
1804H06	>32	>32	0.25	2	256	>256	64	>256	>256	>64	16	16	1
1804H08	>32	>32	0.25	2	>256	>256	64	>256	>256	64	8	8	32
1804H10	>32	>32	0.25	2	256	128	64	>256	>256	64	8	8	>64
1804H16	0.25	0.5	0.25	0.5	4	4	2	<=0.016	4	0.125	0.125	0.125	0.25
1804H21	>32	>32	0.25	2	128	256	64	>256	>256	64	32	16	>64
1804H23	>32	>32	0.25	2	>256	128	256	>256	>256	64	8	16	32
1804H26	32	32	0.25	2	128	>256	32	128	>256	>64	32	16	1
1805B01	>32	>32	0.25	1	256	128	64	>256	>256	64	16	32	>64
1805B09	>32	>32	0.25	2	256	>256	64	>256	4	>64	32	16	>64
1805B28	>32	>32	0.25	2	256	128	64	>256	>256	32	16	16	>64
1805B49	>32	>32	0.5	1	128	128	32	128	>256	32	16	16	>64
1805H08	>32	>32	0.25	1	256	128	64	>256	>256	64	16	16	>64
1805H14	>32	>32	0.25	1	256	128	64	>256	>256	64	16	16	>64
1805H27	0.5	0.5	0.5	0.25	8	2	2	<=0.016	16	0.125	0.125	0.064	0.125
1805H30	0.5	0.25	0.5	0.125	2	2	2	<=0.016	8	0.125	0.064	0.125	0.5
1806B13	>32	>32	0.25	2	>256	128	256	>256	8	32	8	8	1
1806B26	>32	>32	0.25	2	>256	>256	64	>256	>256	>64	16	8	>64
1806B34	>32	>32	0.25	1	256	128	64	256	4	64	16	2	>64
1806B41	32	32	0.25	2	256	>256	32	256	>256	>64	32	16	2
1806B43	>32	>32	0.25	2	>256	>256	64	>256	>256	>64	16	16	>64
1806B60	0.5	0.5	0.5	0.125	8	4	2	<=0.016	4	0.125	0.125	0.25	0.25
1806H10	32	32	0.25	<=0.064	256	>256	32	>256	>256	64	8	8	1
1806H15	>32	>32	0.5	0.125	128	128	32	>256	>256	64	16	8	>64
1806H16	>32	>32	0.25	0.5	256	>256	64	>256	>256	>64	32	8	16
1806H17	32	32	0.5	0.5	>256	128	32	>256	>256	64	16	8	>64
1806H19	>32	>32	0.125	0.5	>256	>256	128	>256	>256	64	8	8	1
1807B06	>32	>32	0.25	1	>256	>256	128	>256	>256	64	8	8	>64
1807B07	0.25	0.5	0.25	0.125	4	4	1	<=0.016	8	0.125	0.25	0.125	0.125
1807B13	32	32	0.25	1	256	>256	32	>256	>256	32	4	4	16
1807B18	0.25	0.25	0.25	0.125	4	4	2	<=0.016	16	4	1	0.064	0.125
1807B25	32	>32	0.25	1	256	128	32	>256	>256	16	4	4	16
1807B28	>32	>32	0.25	1	256	128	64	>256	>256	64	8	16	16
1807B52	32	>32	0.25	2	256	>256	64	>256	>256	64	8	16	0.5
1807B67	>32	>32	0.25	1	128	128	32	>256	>256	16	4	4	16
1807B69	0.25	0.25	0.5	0.25	4	4	1	<=0.016	8	0.125	0.064	0.5	2
1807H03	>32	>32	0.5	1	256	256	32	256	>256	64	16	16	16
1807H05	>32	>32	0.25	2	256	256	32	>256	8	64	8	1	16
1807H06	>32	>32	0.25	1	>256	>256	128	>256	>256	64	8	8	32
1807H12	>32	>32	0.25	2	128	128	32	>256	>256	64	16	1	32
1807H22	32	32	0.25	2	128	128	64	>256	8	64	8	0.5	>64
1807H38	>32	>32	0.25	2	>256	>256	64	>256	>256	64	8	8	16
1808B17	0.25	0.25	0.25	0.125	4	4	2	0.032	4	0.125	0.125	0.064	0.125
1808H06	0.25	0.5	0.5	0.5	4	4	1	<=0.016	4	0.125	0.25	8	0.25
1808H08	>32	>32	0.25	1	>256	>256	64	>256	>256	32	8	8	16
1808H09	>32	>32	0.25	1	>256	>256	>256	>256	32	32	8	0.125	0.064
1808H13	32	>32	0.25	2	256	>256	64	>256	>256	64	8	8	16
1808H21	0.25	0.5	0.5	0.25	4	2	1	<=0.016	4	0.125	0.125	0.5	0.25
1808H28	32	32	0.25	1	256	>256	64	>256	>256	64	8	8	0.5
1808H29	0.25	0.5	0.5	0.25	4	4	1	<=0.016	4	0.125	0.125	0.25	0.25
1810B28	>32	>32	0.25	1	>256	>256	64	>256	>256	64	8	8	0.5
1810H04	>32	>32	0.25	2	>256	128	128	>256	>256	>64	16	16	1
1810H05	32	32	0.25	2	>256	128	128	128	>256	>64	32	16	4
1810H06	32	>32	0.25	1	>256	>256	32	>256	>256	64	8	8	16
1810H08	>32	>32	0.5	2	>256	>256	64	>256	>256	64	8	8	0.5
1810H16	2	1	0.5	2	>256	>256	32	32	>256	1	0.5	0.25	16
1810H19	2	1	0.5	1	>256	>256	32	32	>256	0.5	0.125	0.25	16
1810H25	2	1	0.5	1	>256	>256	32	32	256	0.5	0.5	0.25	16
1810H28	32	32	0.25	1	>256	>256	64	>256	>256	32	8	4	16
1810H30	0.25	0.25	0.25	0.125	2	2	2	<=0.016	4	0.125	0.125	0.032	0.125
1810H35	>32	>32	0.25	1	256	>256	32	>256	>256	>64	32	16	16
1811B09	32	32	0.25	2	128	64	32	256	>256	>64	16	16	64
1811B10	32	32	0.25	2	128	64	32	256	>256	>64	16	16	64
1811B40	0.25	0.25	0.25	0.25	4	32	2	<=0.016	4	0.064	0.064	0.125	0.064
1811H10	32	32	0.25	2	128	64	32	256	>256	64	16	16	16
1811H14	32	32	0.125	2	128	128	32	>256	>256	64	16	8	16
1811H72	>32	>32	0.125	0.25	256	>256	64	>256	>256	16	2	1	16
1811H77	0.25	0.25	0.5	0.125	8	8	2	<=0.016	4	0.125	0.125	0.125	0.25
1811H78	0.25	0.25	0.5	0.125	8	4	2	<=0.016	4	0.125	0.125	0.125	0.25
1811H81	32	32	0.25	2	128	128	32	256	>256	64	16	16	16
1811H85	0.25	0.5	1	0.125	4	4	2	<=0.016	4	0.064	0.125	0.125	0.125
1811H90	32	32	0.25	2	128	128	32	256	>256	64	16	16	16
1812H02	>32	>32	0.25	2	>256	>256	64	>256	>256	32	8	4	0.5
1812H06	16	16	0.25	2	64	64	32	256	>256	64	16	16	16
1812H14	32	>32	0.25	2	64	64	128	256	>256	64	16	16	16
1812H21	>32	>32	0.25	2	256	128	64	>256	4	32	8	4	8
1812H22	16	16	0.25	0.5	>256	>256	128	256	>256	32	4	8	16
1812H30	>32	>32	0.25	2	128	256	64	>256	8	32	4	4	8
1812H36	>32	>32	0.25	2	128	256	64	>256	>256	32	8	8	8
1812H41	32	32	0.25	2	64	64	32	256	8	64	16	16	16
1812H42	>32	>32	0.5	1	128	64	128	>256	>256	32	8	4	8
1812H43	>32	>32	0.25	2	>256	>256	64	>256	>256	32	8	4	0.5

## Sheet: Independent test dataset
Table S3b. The MICs of 13 antimicrobial agents for 120 A. baumannii isolates of independent test dataset.
Strain_ID	IPM	MEM	CST	TGC	FEP	CAZ	CSL	TZP	AMK	CIP	LVX	MIN	SXT
2001B52	0.5	1	0.25	0.125	1	4	2	<=0.016	8	0.064	0.064	0.064	0.25
2001B57	0.5	0.25	0.25	0.125	1	4	2	<=0.016	8	0.064	0.064	0.064	0.125
2001H23	0.25	1	0.5	0.125	2	8	2	4	8	0.064	0.125	0.064	0.064
2002B14	>32	>32	0.5	2	64	128	32	>256	>256	64	8	4	0.5
2002H04	16	32	0.5	2	32	128	32	256	>256	64	16	16	32
2003B44	32	32	0.5	2	128	256	32	>256	>256	64	8	4	0.5
2003B45	>32	>32	0.25	2	64	128	32	>256	>256	>64	32	16	128
2003H04	>32	>32	0.25	1	64	128	32	>256	>256	64	32	8	16
2004B08	>32	>32	0.5	2	64	128	32	>256	>256	64	16	8	1
2004H30	>32	32	0.5	2	64	128	32	>256	>256	64	8	8	0.5
2004H34	32	32	1	2	64	128	32	>256	>256	64	16	1	32
2004H38	>32	>32	1	8	64	128	32	>256	>256	>64	16	1	32
2005B09	0.25	0.25	0.25	1	4	4	32	<=0.016	4	0.125	0.064	0.5	0.25
2005B57	0.25	2	0.25	0.25	4	16	2	4	8	0.25	0.125	0.064	0.25
2005H10	32	32	0.25	2	64	128	32	>256	>256	64	8	8	>128
2006H11	32	32	1	2	64	128	32	>256	>256	64	8	8	0.5
2006H27	32	32	0.5	2	64	128	32	>256	>256	64	8	4	16
2006H36	>32	>32	0.5	4	64	128	32	>256	>256	>64	16	4	32
2007B71	0.25	0.25	1	0.25	2	8	2	<=0.016	8	0.125	0.125	0.064	0.25
2009H06	0.25	0.25	0.5	0.125	2	8	2	<=0.016	8	0.125	0.125	0.064	0.25
2009H09	0.5	0.5	0.5	0.125	2	8	2	<=0.016	4	0.125	0.064	0.064	0.125
2009H11	>32	>32	0.5	1	64	128	64	>256	>256	64	8	4	1
2010B36	>32	>32	1	2	64	128	32	>256	>256	64	16	16	128
2010H34	0.25	0.25	0.5	0.25	4	8	2	<=0.016	8	0.125	0.125	0.064	0.25
2010H50	>32	32	0.5	2	32	128	32	256	>256	64	16	16	32
2010H62	>32	>32	0.5	2	64	256	32	>256	>256	64	8	4	128
2011A01	0.25	0.25	0.5	0.25	2	4	2	<=0.016	4	0.125	0.125	0.064	0.25
2011B50	>32	>32	0.5	2	64	>256	32	>256	>256	64	8	4	0.5
2011B62	>32	>32	1	2	128	>256	32	>256	>256	64	16	16	128
2011H03	32	32	0.25	2	64	128	32	>256	>256	64	8	8	1
A4294106-1	32	32	0.5	1	64	>64	64	256	>256	32	16	8	NA
A4294106-2	>32	>32	0.5	2	256	>64	64	>256	>256	64	16	32	NA
A4294106-3	32	32	0.25	0.5	16	>64	32	256	>256	32	8	8	NA
A4294106-4	32	>32	0.25	2	256	>64	64	>256	>256	64	16	32	NA
A4316057-1	>32	>32	NA	2	256	128	64	>256	>256	>64	64	16	NA
A4316057-2	>32	>32	1	2	256	128	64	>256	>256	>64	128	16	NA
A4316057-3	>32	32	2	2	128	128	64	>256	>256	>64	64	16	NA
A4316057-4	>32	>32	2	8	>256	>256	128	>256	>256	>64	32	16	NA
A4338474-1	32	32	0.25	2	>256	>256	32	>256	>256	64	8	8	NA
A4338474-2	32	32	0.25	4	>256	>256	32	>256	>256	64	8	8	NA
A4338474-3	>32	>32	0.25	0.5	>256	>256	128	>256	>256	64	8	8	NA
A4338474-4	32	32	0.25	2	>256	>256	128	>256	>256	64	8	8	NA
BJ16085	>32	>32	1	2	128	64	64	>256	>256	64	16	16	64
BJ16092	>32	>32	0.5	2	32	64	64	>256	>256	64	8	4	32
BJ16097	>32	>32	0.5	2	128	>256	64	>256	>256	64	4	4	16
GDZ16087	>32	32	1	2	128	>256	64	>256	>256	>64	16	4	32
GDZ16095	>32	>32	1	8	256	>256	128	>256	>256	64	8	8	1
GDZ16099	>32	>32	1	2	256	>256	128	>256	>256	>64	32	8	32
HEB18091	64	64	0.5	4	128	>256	32	>256	>256	>64	32	32	0.25
HEB18094	64	64	1	4	64	>256	32	>256	4	64	8	8	0.5
SH16061	>32	>32	0.5	4	256	>256	64	>256	>256	64	8	4	64
SY16087	32	32	1	2	64	128	64	>256	>256	64	8	4	32
SY16088	>32	16	1	4	64	64	32	>256	>256	64	8	16	32
SY16090	32	32	1	2	64	>256	64	>256	>256	32	8	4	0.25
WH18075	64	32	0.5	4	128	256	64	>256	>256	>64	16	32	32
XJ16115	>32	32	0.5	4	32	64	32	>256	>256	>64	16	16	16
XJ16120	32	16	1	4	64	256	32	256	>256	64	16	16	1
ZJ16087	32	16	1	2	256	>256	64	>256	>256	64	8	4	1
ZJ16093	32	16	1	2	64	>256	64	>256	>256	64	4	4	0.5
ZJ18087	64	32	1	8	256	128	64	>256	8	64	16	8	1
AR_0033	64	>8	1	<=0.5	>32	>128	NA	>128	2	>8	8	NA	>8
AR_0035	>64	>8	1	2	>32	>128	NA	>128	4	>8	8	NA	>8
AR_0036	64	>8	1	4	32	>128	NA	>128	32	>8	>8	NA	>8
AR_0037	64	>8	0.5	<=0.5	>32	>128	NA	>128	2	>8	8	NA	>8
AR_0045	32	>8	1	1	>32	>128	NA	>128	2	>8	8	NA	>8
AR_0063	>64	>8	1	1	>32	>128	NA	>128	16	>8	8	NA	>8
AR_0078	64	>8	1	4	>32	>128	NA	>128	64	>8	>8	NA	2
AR_0083	>64	>8	1	1	>32	>128	NA	>128	>64	>8	8	NA	>8
AR_0088	64	>8	0.5	<=0.5	>32	>128	NA	>128	64	>8	8	NA	>8
AR_0101	>64	>8	1	2	>32	>128	NA	>128	32	>8	>8	NA	>8
AR_0102	2	4	1	2	32	64	NA	>128	>64	>8	>8	NA	>8
ARLG-1775	>8	4	1	1	<=2	<=1	NA	<=8	8	>2	NA	<=2	NA
ARLG-1777	>8	>8	1	1	16	>16	NA	>64	<=4	>2	NA	<=2	NA
ARLG-1788	>8	>8	2	1	>16	>16	NA	>64	>32	>2	NA	<=2	NA
ARLG-1818	>8	>8	0.5	1	16	>16	NA	>64	>32	>2	NA	8	NA
ARLG-1854	>8	>8	>4	1	>16	>16	NA	>64	>32	>2	NA	8	NA
ARLG-1860	>8	>8	1	2	>16	8	NA	>64	>32	>2	NA	<=2	NA
ARLG-1894	>8	>8	1	1	>16	>16	NA	>64	<=4	>2	NA	16	NA
ARLG-1912	>8	>8	<=0.25	2	>16	>16	NA	>64	>32	>2	NA	4	NA
ARLG-1915	>8	>8	1	1	>16	>16	NA	>64	8	>2	NA	8	NA
FDA-CDC-AR_0273	32	>8	1	1	>32	64	NA	>128	>64	>8	>8	8	>8
FDA-CDC-AR_0274	>64	>8	0.5	1	32	64	NA	>128	16	>8	>8	8	>8
FDA-CDC-AR_0275	64	>8	0.5	1	32	128	NA	>128	>64	>8	8	8	>8
FDA-CDC-AR_0277	>64	>8	1	2	>32	>128	NA	>128	16	>8	>8	<=4	>8
FDA-CDC-AR_0278	64	>8	1	1	32	128	NA	>128	>64	>8	8	8	>8
FDA-CDC-AR_0279	64	>8	1	1	32	128	NA	>128	>64	>8	8	8	>8
FDA-CDC-AR_0280	2	2	1	1	32	128	NA	>128	8	>8	8	8	>8
FDA-CDC-AR_0281	8	>8	1	<=0.5	16	128	NA	>128	4	>8	8	<=4	>8
FDA-CDC-AR_0282	64	>8	0.5	1	>32	>128	NA	>128	>64	>8	8	8	>8
FDA-CDC-AR_0283	64	>8	1	2	32	128	NA	>128	>64	>8	>8	8	>8
FDA-CDC-AR_0284	64	>8	1	1	32	32	NA	>128	>64	>8	>8	<=4	>8
FDA-CDC-AR_0285	>64	>8	1	1	32	>128	NA	>128	32	>8	>8	<=4	>8
FDA-CDC-AR_0286	>64	>8	0.5	1	32	128	NA	>128	>64	>8	8	8	>8
FDA-CDC-AR_0287	64	>8	1	<=0.5	32	128	NA	>128	32	>8	8	<=4	>8
FDA-CDC-AR_0288	32	>8	>8	4	>32	64	NA	>128	>64	>8	>8	16	>8
FDA-CDC-AR_0289	>64	>8	2	1	32	128	NA	>128	32	>8	>8	16	>8
FDA-CDC-AR_0290	64	>8	1	1	>32	128	NA	>128	>64	>8	8	8	>8
FDA-CDC-AR_0291	64	>8	1	2	32	128	NA	>128	>64	>8	8	8	>8
FDA-CDC-AR_0292	>64	>8	1	<=0.5	32	>128	NA	>128	32	>8	4	8	1
FDA-CDC-AR_0293	>64	>8	0.5	<=0.5	32	>128	NA	>128	32	>8	4	8	1
FDA-CDC-AR_0294	64	>8	1	2	>32	128	NA	>128	64	>8	>8	16	>8
FDA-CDC-AR_0295	>64	>8	1	4	>32	>128	NA	>128	4	>8	>8	16	>8
FDA-CDC-AR_0296	64	>8	0.5	2	>32	>128	NA	>128	>64	>8	>8	<=4	>8
FDA-CDC-AR_0297	64	>8	1	4	>32	128	NA	>128	32	>8	>8	16	>8
FDA-CDC-AR_0298	64	>8	0.5	>4	>32	128	NA	>128	>64	>8	>8	8	>8
FDA-CDC-AR_0299	64	>8	2	2	>32	>128	NA	>128	>64	>8	>8	<=4	>8
FDA-CDC-AR_0300	2	2	1	1	16	64	NA	128	>64	>8	>8	8	>8
FDA-CDC-AR_0301	>64	>8	0.5	4	>32	128	NA	>128	64	>8	>8	16	>8
FDA-CDC-AR_0302	>64	>8	2	4	>32	>128	NA	>128	>64	>8	>8	8	>8
FDA-CDC-AR_0303	64	>8	>8	2	32	128	NA	>128	>64	>8	>8	8	>8
FDA-CDC-AR_0304	32	>8	4	2	>32	64	NA	>128	32	>8	>8	16	>8
FDA-CDC-AR_0305	64	>8	1	2	32	128	NA	>128	32	>8	8	<=4	>8
FDA-CDC-AR_0306	>64	>8	1	4	>32	>128	NA	>128	64	>8	>8	<=4	>8
FDA-CDC-AR_0307	16	>8	>8	2	32	64	NA	>128	>64	>8	>8	16	>8
FDA-CDC-AR_0308	16	>8	8	1	32	128	NA	>128	>64	>8	>8	16	>8
FDA-CDC-AR_0309	>64	>8	8	2	>32	>128	NA	>128	>64	>8	>8	16	>8
FDA-CDC-AR_0310	>64	>8	8	2	>32	>128	NA	>128	>64	>8	>8	16	>8
FDA-CDC-AR_0311	64	>8	1	1	>32	>128	NA	>128	>64	>8	8	<=4	>8
FDA-CDC-AR_0312	1	8	0.5	2	>32	64	NA	>128	2	>8	4	<=4	>8
FDA-CDC-AR_0313	32	>8	1	1	32	>128	NA	>128	2	>8	8	<=4	>8
