# Supplementary material for: Machine learning and feature extraction for rapid antimicrobial resistance prediction of Acinetobacter baumannii from whole-genome sequencing data
Source: Front Microbiol. 2024 Jan 11;14:1320312. doi: 10.3389/fmicb.2023.1320312 (PMC10808480; doi:10.3389/fmicb.2023.1320312)
Supplement: Supplementary file 5 [file Table_4.xlsx]

## Sheet: Summary
Table S31. The top-ranked 11-mers for each antimicrobial agent.
Antimicrobial agents	K-mer
Imipenem	AAAAGGGGTGA,AAAAGTGTTTA,AAACACCGATG,AAACCCCCTAC,AAACTAAAACT,AAACTATCTTG,AAAGAATTGGA,AAAGCGTCCTT,AAATAATGACG,AAATATATCCT,AAATATTAAGA,AAATGCGTACA,AAATGGAGCGA,AAATGGCGGGT,AAATGGTCACA,AAATTATGACG,AAATTCTACCG,AAATTGAAGAA,AAATTGGCACC,AACAAAAGAGC,AACACGGATCT,AACAGATTACC,AACATCCTACC,AACATGCTTGA,AACATTTAGTT,AACCAGTTGTG,AACCATGACTT,AACCCGATCTT,AACCGGTATAC,AACCTTGCACA,AACGAAATACT,AACGCATGCGG,AACGCCAAAAT,AAC…
	ACCGTGGGGGA,ACCTAAGATGA,ACCTCCAACGT,ACGAACGTGGG,ACGACCATCTG,ACGACGCATAT,ACGAGTCCAAT,ACGATAAAAAG,ACGATACGGAC,ACGATCTTAAT,ACGATTTCGCA,ACGCACATTTG,ACGCCACAAGC,ACGCCCCGGGA,ACGCCGTTAAA,ACGCGGCCACT,ACGCGTTTCAT,ACGGCCTTGAT,ACGTTCGGCAG,ACTACGACTAA,ACTCCAAAAGG,ACTGCGGCTAA,ACTGCTAATCG,ACTGGTCCACC,ACTGTCTCATG,ACTTTTGCTCT,AGAAAAAACAT,AGAAAATTGAA,AGAAACGCTTA,AGAACTGATGA,AGAAGCGATTC,AGAATAGGTCC,AGAATGATGAT,AGA…
	ATCCCACTTAG,ATCGCCATAAG,ATCGCTATTGG,ATCGTCACACA,ATCGTGCCAAA,ATCGTTATGAC,ATCTCACTGAA,ATCTGATAGAA,ATCTTTCTTTC,ATGACACAAAT,ATGCAACCTTA,ATGCATAACCG,ATGCGAGATGA,ATGCGTCTACA,ATGGCACTATC,ATGGCATAAAG,ATGGCTGTAAG,ATGGGATGATG,ATGGGTTCGGC,ATGGTACAGCA,ATGGTATACCA,ATGTACTAATG,ATGTCACCTTA,ATGTCCACTCA,ATGTCTGCGCC,ATGTCTTATGG,ATTAAGCTCCG,ATTACCACGGA,ATTACGCTCGA,ATTACTATAAA,ATTATAAAGGA,ATTCACGACTA,ATTCCTGACGA,ATT…
	CCCTATATGAC,CCGCGGTAGAC,CCGGAGTTCTC,CCGTAGTGTCG,CCTAACGGAGA,CCTCGGTGTAA,CCTGACAGCCA,CCTTGGACTAG,CCTTGGCTTAG,CCTTGTAGCCA,CGAAAATTTCA,CGAAAATTTCC,CGAAGACTACA,CGACTTATTTC,CGAGATGAGTC,CGAGCTACGAC,CGATAGGTAGA,CGATCTATACG,CGATTAAACTA,CGCAAGGACCG,CGCAGTTGGAG,CGCTTCTATAC,CGCTTTTCACC,CGGAACAGGGA,CGGACGGCCGA,CGGAGGCACTA,CGGAGGCGTGA,CGGCCATGACC,CGGTGGTACTC,CGGTGTAGATA,CGTAAGGCAAC,CGTACCACTGC,CGTAGAAAGAC,CGT…
	GCCAATATCCA,GCCCAGCACCA,GCCCATGATTA,GCCCGCCCTAA,GCCTATCTACC,GCCTTCTATAA,GCGCAAGACCC,GCGCTATTAGA,GCGGATTTTAC,GCGGCAGAGTA,GCGGGGCTTTA,GCGTGAAGATA,GCTCGCGGACC,GCTCGCTCAGC,GCTGCTCATTA,GCTGTCAACCA,GCTTCTTAATA,GCTTTATAGCA,GCTTTTTGCGA,GGAACGATTAA,GGAACTTGCGA,GGACTGCAAAC,GGAGGAGGCAC,GGAGTGAACCC,GGATCCAGGAC,GGATGGGTCCA,GGATTAGAAAA,GGCTCAGAAAC,GGGAGGCTTCA,GGGTATTGATA,GGTAAACCGAC,GGTAAGTAACA,GGTCCAGGGAC,GGT…
Meropenem	AAAACACACGC,AAAAGTCGAGC,AAACTATCATT,AAACTATCCTC,AAAGAGCACTT,AAAGCATACAT,AAATCCAGTGA,AACAACGACCG,AACAAGAACGC,AACAGCTAGCT,AACATAAACCC,AACATGTCAAA,AACCCCAACAT,AACGCGGACCA,AACGGATCTAT,AACTGCCGACA,AACTGGATTCA,AACTTAGTGAC,AAGACAGATGG,AAGAGCTAAGA,AAGAGGAGCTT,AAGCACAGGGG,AAGCACGATGT,AAGCGCCAGAT,AAGCGTCGATC,AAGCTATCCGA,AAGGATTCAGC,AAGGCAATTCA,AAGGGTAGATA,AAGTCATTGTA,AAGTGGGACTA,AAGTTAGGGGG,AATCCCGCGTG,AAT…
	AGAACTAGCAT,AGAAGAGTAAT,AGAAGGGTACC,AGAAGGTGTGG,AGAATCGCTAT,AGAATTCCCTA,AGACATCTGAC,AGACCCTTGGG,AGACTCAGGAA,AGACTCTACGC,AGACTGCATCC,AGACTGTCTGC,AGAGCCGCTTG,AGAGCGCGAAT,AGAGCTGAGGG,AGATTACAGTC,AGCAAAGGACC,AGCATCACCGA,AGCATCGGCGA,AGCCCGGAGCC,AGCCCTAGCAG,AGCGAGGCATA,AGCGCAGTCAA,AGCGCTGGAAT,AGCGCTTTGCA,AGCGGACTTAT,AGCGGTACGCA,AGCGTCCCTCG,AGCTAGCTACT,AGCTAGGGTGC,AGCTATCGTGA,AGGAGAGTGTC,AGGATAACAAG,AGG…
	ATTCGACTCCG,ATTCTAGCACG,ATTGCTATCCA,ATTGCTCTAGA,ATTTGCGAAAG,CAAACACACGG,CAAACATCGGC,CAAACCTAGGA,CAAATCCTGGC,CAACGTGCGGC,CAAGACGAGAA,CAAGCAGCGTG,CAATAACGTAC,CAATTACCCCG,CAATTGTGCTC,CACAAATGTCA,CACAAGAAGAG,CACACAGGCTA,CACACGATGAC,CACATAACCGG,CACATGACCCC,CACCGGGGTTC,CACCGTAATTA,CACGACTATGC,CACGGACTAAC,CACGTTGGTCC,CACTAGTTGCC,CACTGGAAGAG,CACTTGCCAAA,CAGAACCAAAC,CAGAAGGCGGC,CAGACACGGAC,CAGAGATGTGA,CAG…
	CCTCAGGTCCC,CCTCAGTCTTC,CCTCCATGGGA,CCTCGTTATTC,CCTGCGGTCCA,CCTGGAACGTA,CCTTATGGTCC,CCTTGACTCTC,CGAAAACGAGA,CGAATGTGCGC,CGACGGGTAAG,CGACTAGACAG,CGACTCTGCGA,CGAGACCAGAG,CGAGCAGAACG,CGAGGCAACTC,CGATATAATTA,CGATATCATTC,CGATTTGGCCC,CGCAATGACAC,CGCCAACAGTC,CGCCTCATAAC,CGCGCGTGAAG,CGCGTCAAAAA,CGCTAATGACC,CGCTTATACTA,CGGAATTATAA,CGGACGAGAAA,CGGGCATATTA,CGGTAAGACGC,CGGTTGGGATA,CGTATTCCACG,CGTCTTTAGAG,CGT…
	GATGCTAGCCC,GATGTGGAACC,GATTAGGCGAC,GCAACATCCTA,GCACCAGTCTA,GCATTCTACAA,GCCACCCAAAC,GCCCATACTAC,GCCCTCGTGAC,GCCCTGCCGCC,GCCGAGTTCGC,GCCGCCTAGAA,GCCGTACTTCC,GCCTCTATCCC,GCCTGTCTTAC,GCCTTAATTGA,GCGAACATGAC,GCGCTCAAACC,GCGCTGTCTGA,GCGGGACCTCA,GCTAACTTGGA,GCTACTTGAAA,GCTAGTAGTCA,GCTATACCCGA,GCTGGCGTACC,GCTGGGCGGTA,GCTGTGTTGTA,GCTTGCAAGCA,GGACCAGTGTA,GGAGTGATGAC,GGATACCGAAA,GGCAGTCTACC,GGCATGAGAAC,GGC…
Colistin	AAAACTTGACG,AAAAGCATCGC,AAAAGTGAGTC,AAAATCTATGG,AAACGAAGCAG,AAACGTAACCC,AAAGAGCTTGC,AAAGATTGCTA,AAAGCTGCCTG,AAAGGCTGGTA,AAAGGGCGTTA,AAAGGTACTTA,AAATATAGACA,AAATTCTGCGT,AACAAAGCCTG,AACACTTTAGG,AACATATATCT,AACCAATGGCC,AACCAGAGGTG,AACCATAGGGG,AACCGTGCCAA,AACCTAAGGGT,AACCTCACGGT,AACGCATTGGT,AACTACCAGAA,AACTGACAATT,AACTTCTCGTC,AACTTGGTGCT,AAGAATTCGAT,AAGATACATTG,AAGATTCAGCA,AAGATTGCTGT,AAGCACACCAC,AAG…
	ACCTATGAACG,ACCTTCATCTG,ACCTTGGGCGT,ACCTTTGGTGG,ACGAGAAGCAA,ACGATATAGGC,ACGCCCGTACC,ACGCGAGGATG,ACGGACAAATG,ACGGGAGGCTG,ACGTCCCCTAT,ACGTTGAGGAC,ACTAACCTTCA,ACTACTCGAAC,ACTATTTACAT,ACTCACTTCAG,ACTCATTTGAT,ACTCCGACTCG,ACTCTATTTCA,ACTGATTGAAC,ACTGCATTCTC,ACTGCTATACT,ACTGGACTGAC,ACTGTTGGGAA,ACTTCATTAGC,ACTTCGCCCCG,ACTTCTGTTCG,ACTTCTTAATA,ACTTGATGCGG,ACTTGTAATTA,ACTTGTGAACG,ACTTTTTCTCC,AGAAAACACTG,AGA…
	ATCCTTCATAG,ATCGAACGGCG,ATCGAATTCAT,ATCGTAAGAGA,ATCGTGTGAAT,ATCTACCTTGG,ATCTATCGCTG,ATCTCCGAACA,ATCTCGAGAGC,ATCTGCAGGTC,ATGACAGCACC,ATGACAGCCAC,ATGACTGATCC,ATGAGCTGGTA,ATGATCAGGTA,ATGCATTGCAA,ATGCCCAGGGA,ATGCCCTTAAA,ATGCCTTCTTA,ATGCGGGGTGC,ATGCTAAATGG,ATGGTCGTAAT,ATGGTTCGATG,ATGTAACATGG,ATGTATTCAGA,ATGTGGGTCTG,ATGTGTCGCTG,ATGTTCTTCCC,ATGTTTCTCAG,ATTACAGATTG,ATTACTTACGG,ATTAGAACTGC,ATTAGTGGTTA,ATT…
	CCCGGTCCTGC,CCCTATTCAGA,CCCTCTCGGAG,CCCTGGACCCG,CCCTGTCGACC,CCGACCAACAC,CCGACTCAACC,CCGAGGCCTGC,CCGAGGTTCTC,CCGCCCACTAC,CCGCTCGTTTA,CCGTGTCCCGA,CCTAGGCTGGA,CCTAGTATAGG,CCTCAATCTCG,CCTCACCAAGG,CCTCAGAACAA,CCTCATAGTTA,CCTCATCCGGC,CCTCCACTTAA,CCTCCTGTAAG,CCTGAATCATA,CCTGACAGAGC,CCTGGAGTAAC,CCTTATTATGA,CCTTTTACTCC,CGAAGCTCGAA,CGAAGTAGATC,CGAATCGCTAC,CGAATGCAACA,CGACATGTAGA,CGAGACATCCG,CGAGGGACTAA,CGA…
	GAGACAGTCAC,GAGAGCCTAGA,GAGCACAACCC,GAGTAATTAAC,GAGTATACATC,GAGTGAAGCCC,GATCAAACATC,GATCAAATAGC,GATCGGATGAC,GATCTATCTAA,GATTATCGTAA,GCAAATTCGCA,GCAACGCATCC,GCAAGAATCCA,GCACTACGAAA,GCACTCTCCGA,GCAGAGAATAC,GCAGATTTCTA,GCAGGGGGGGC,GCAGTCCACGA,GCATCCATCGC,GCATTCGACTA,GCCACAAAACC,GCCAGTCTACA,GCCGACGTCCC,GCCTAACAAAC,GCGAGGACAAC,GCGATCACAGA,GCGCCCTTTAC,GCGCGAAAACA,GCGCTTGCTGA,GCGGTTACCCC,GCGTGTTAAAA,GCT…
Tigecycline	AAAACCCCACA,AAACACACTAA,AAACCCCGGCT,AAACCTATGTC,AAACCTCCGAG,AAACGATCACA,AAACGGATCGC,AAACTCCGTGG,AAAGACGCCTC,AAAGATCGCAC,AAAGCTGACAT,AAAGGGACTCG,AAAGGGTGTCG,AAATCTTTCTA,AAATTACAACT,AAATTCTCCTA,AACACACCTCT,AACATGGCGTT,AACCCGACAAC,AACCCTATCAC,AACGAATCTAA,AACGACCATCC,AACGACGGGCA,AACGCCGAATG,AACGGAGAACG,AACGTCTCTTA,AACTAAGAACC,AACTCCCTTCT,AACTCGTCCAG,AACTTCCGACC,AAGAATTGTGG,AAGAGCATCGG,AAGCCCTGACC,AAG…
	ACGGCAAGGTA,ACGGGCTTAGT,ACGGTAGGAAA,ACGGTCTCAAG,ACGTAGCGGTA,ACGTATGGCGA,ACGTCCCTTCT,ACGTCTCGACC,ACGTGCGTGAA,ACGTGCTATCT,ACGTGTGAGAT,ACTAAACATCT,ACTAACAGACG,ACTAATTTGGA,ACTACGATAAG,ACTACTAGTCT,ACTACTTTATG,ACTAGCCGCAT,ACTATTGACCC,ACTCCCAAGGC,ACTCCTGACAC,ACTCGGACCTA,ACTCGGATACC,ACTCTACAATC,ACTCTTGATAG,ACTGACAATGC,ACTGTGTCCTA,ACTTAAGAAAC,ACTTACCGACC,ACTTAGAGAGG,ACTTAGTCACC,ACTTTCCTACT,AGAACATAGTC,AGA…
	ATCATAGTATC,ATCCCGACCTA,ATCGAATTCTA,ATCGGTACCAA,ATCGGTGCGTG,ATCGTATTGTC,ATCTTCAACAT,ATCTTCAGTGC,ATCTTCGATAA,ATCTTGCTACG,ATGAAAGGTAC,ATGACAGTCAA,ATGCCCGACCG,ATGCTACTGGG,ATGCTATGCTC,ATGGAGCTGAG,ATGGATGGGAC,ATGGCGTCATC,ATGGGGAAAAG,ATGTGTACAAG,ATGTTCGCACC,ATTACATATGA,ATTAGACCGAG,ATTATAGTACG,ATTCATCTCCC,ATTCCGGTTCG,ATTCCGTTAGC,ATTCTGCATGC,ATTTCAACCGG,ATTTCCTATGG,ATTTTCTGAGA,CAAAACAAGTA,CAACACCTAGA,CAA…
	CCTAACTGTAA,CCTATATCATA,CCTATGTTCGC,CCTCGATAGTA,CCTCGTGTGAG,CCTCTGAGCTC,CCTCTGGACAC,CCTGATTAAGA,CCTGGTAGAAG,CCTGGTGTGAC,CCTTACTCCCG,CGAAAGCCTTC,CGAACATTCAA,CGAGCCGGCAG,CGAGGCATTTC,CGAGTGGACCC,CGAGTGTTTTC,CGATACACGGC,CGATTCACTAG,CGCAACTAGGA,CGCAGACTCAG,CGCGTAAGATA,CGCGTTTATGA,CGCTAACGCCA,CGCTCAGACAC,CGCTGGGGATA,CGCTGGTAGGA,CGGAACCGAAA,CGGAACCGTCC,CGGAGACGTAC,CGGAGGACACA,CGGCTCGCTGA,CGGGCCCGTGA,CGG…
	GACCGCGAACA,GACGCAGTTGC,GACGCCAGACC,GACGTGTCACA,GACTAGGTAGA,GACTGTAACAC,GAGAGTAGCAC,GAGATCAGGTA,GAGCAGGAAGA,GAGCGCCCCCC,GAGCTCACACA,GAGTAATTCGA,GAGTGAAAAGC,GAGTGTAACAC,GAGTTATGCCA,GATAGGTCGAC,GATATTAGGGA,GATTAGAGAAA,GATTGACGTGA,GCACCAGCTTA,GCATGAAGGCC,GCCAACTGCGA,GCCACGCTGGA,GCCCAACGAGA,GCCCATCGTCC,GCCCGGATACC,GCCCGTACGAA,GCCCTTCATGA,GCCGCACACAA,GCCTACACCGC,GCCTACCTAGA,GCGAAAATAGA,GCGCAGCAGTA,GCG…
Cefepime	AAAACTGGATC,AAAAGATGTTA,AAAATGCTACG,AAACAATACCC,AAACACACGGC,AAACACGCTTT,AAACAGTAAAC,AAACAGTACCG,AAACATCGACC,AAACCCACGAC,AAACCTTCTTA,AAACTATTATG,AAACTCGTCTT,AAACTGCAGCC,AAAGACCCAGT,AAAGAGCTTCT,AAAGCAAGCGA,AAAGTAGGGTT,AAAGTCTGACC,AAATAGGAAAC,AAATCAAGCTA,AAATCGGTAGT,AAATCTCCATC,AAATGGACTCT,AACAAACGATG,AACAAGCGCAC,AACAGCAAGGC,AACAGTCCCGC,AACAGTGAGAG,AACATAGATCT,AACATTTCCGC,AACCAGATCAG,AACCCGATAGT,AAC…
	ACGCCTGTAGC,ACGCTCGTCAA,ACGGAATGATG,ACGGGGTGGTG,ACGTACACCCG,ACGTATACGAA,ACTACAAAGAC,ACTACCTTCAA,ACTAGGTTATC,ACTCATCCGAA,ACTCGGCGTAC,ACTGCACCCAG,ACTGCGTCGCT,ACTGGAACGCA,ACTGGCTTGGG,ACTGTAGTTGG,ACTTAGCGAAA,ACTTGACGACT,ACTTGGCGACA,ACTTTCCCTAC,AGAAACGAACT,AGAAACGTGTA,AGAAAGGCGAT,AGACATTTCCA,AGACCACTTCA,AGACCGTTCCG,AGAGATCAAGA,AGAGATTCGCG,AGAGCCCAAAC,AGAGGCGATTC,AGATAAGAACC,AGATAGATGCT,AGCAACGATTA,AGC…
	ATGCTTTCATC,ATGGAAACACC,ATGGCTGGGTG,ATGGGGGCGCA,ATGGGTGCGAA,ATGGTAACGCA,ATGTATTAGAC,ATGTCTGCATA,ATGTCTTACAC,ATGTGCCGCCC,ATGTTCCACAC,ATTACTACCGC,ATTAGGTGACG,ATTATACAGCA,ATTCACGGAAG,ATTCGATATGG,ATTCGATCTAG,ATTCTCGTGTG,ATTCTTCCAAC,ATTTAGATTTC,ATTTCACACGG,ATTTTCGCTCC,ATTTTTGGGTG,CAAAAAGGGTC,CAAAATTTCTC,CAAACCCTATA,CAAAGCTGACG,CAACGAACTGA,CAACGGTTGCA,CAACTATCTCG,CAAGGTCCAGC,CAAGGTTCTGG,CAATAATTACC,CAA…
	CCGGTTTTAAG,CCGTGCAGGGA,CCGTTCTACAG,CCGTTGATGAG,CCTAGACCCTC,CCTATCGGGCA,CCTCCATATCA,CCTCGGTCGCA,CCTCTGCTAGA,CCTGGGACTTA,CCTGTGCCCAC,CCTTCACTACG,CGACAAGGATA,CGACCACTGTA,CGACCAGGTGA,CGACCCTGAAA,CGAGCTAGAGC,CGATCGCATCG,CGATGAGCGAA,CGCAATGAGAA,CGCCGCCTACA,CGCGAAGTGGA,CGCGCCTTCAA,CGCTGCTTGAA,CGCTTATATGA,CGCTTGGCCTC,CGGAAATGCCA,CGGCATCTCCA,CGGCGAATAGA,CGGCTCCAAAA,CGGGCTAGCAG,CGGGTTTCCGC,CGGTAATCGAA,CGG…
	GCCACGACGAA,GCCAGAACAAC,GCCAGGCATAA,GCCATCAGTCA,GCCATCATTCC,GCCATCGAGTA,GCCCAGGTTAA,GCCCCTTGTCC,GCCCGGACTAA,GCCCGGGCTAA,GCCTAACACCA,GCCTCTGTTAA,GCCTTTCGCCA,GCGCAAACGAA,GCGCACAAGAC,GCGCAGGTTGA,GCGGTGCTTTA,GCTAATGGGAA,GCTCAAGTGGA,GCTCCAACACC,GCTGAAGTGTA,GCTGACAATAC,GCTGATTAATA,GCTGCAGGCAC,GCTGTCATGCC,GCTGTTAATTA,GCTTACGCTCA,GCTTGGTGAAC,GGAAAGGATCA,GGAAGCCTTAC,GGAAGGAATGA,GGAGAAACTAA,GGAGAAAGCAC,GGA…
Ceftazidime	AAAAAGTGGAG,AAAAGGACACC,AAAAGGACGGA,AAACCCCACAC,AAACTAGGAGA,AAACTGCAGCC,AAACTGCAGTG,AAAGAAACGAA,AAAGGCCGAGA,AAAGGCTGGCT,AAAGGGACAGT,AAAGGTCACTC,AAATATAAGGG,AAATGAGAGCG,AAATTATGCTA,AAATTGTCCCG,AAATTTTCGGC,AACAAGGATTA,AACACTACGAT,AACACTTCCTG,AACAGTCTATC,AACCGGACCGA,AACGCCCAATC,AACGCGAAGAG,AACTACTATGA,AACTCGTGACA,AACTGCAGCCA,AACTGGTGGGA,AACTGTCCCAG,AACTTGACATA,AAGAGCGTCTA,AAGCACCTCAG,AAGCCCCTTTG,AAG…
	ACTGGAGCTCG,ACTGTCGCCTC,ACTTAGTAGAA,ACTTATCCCAC,ACTTCACACCC,ACTTGCGGAGA,AGAAAGAGATC,AGAACAGTCTA,AGAACCGAATA,AGAAGGATAGC,AGAATCTATAA,AGACAATTCGC,AGACATACTCT,AGACCAGGCAT,AGACCATGAAC,AGACGGCATTC,AGACTGAGCAA,AGACTGCAATA,AGAGCGTAGCT,AGAGCGTGTAC,AGAGTCTCTTA,AGATCCCGCTC,AGATCTCATAG,AGATGTGCAAC,AGATTAAGCTC,AGATTCGCGGG,AGCACCCATAA,AGCACTACCCA,AGCCCAAGGCG,AGCCGCAATAC,AGCGAGTGTTA,AGCGTGGAACG,AGCTATAAGGA,AGC…
	ATTCCCTCGGC,ATTCGGGGGCA,ATTCGGGTGCA,ATTCGTGCATC,ATTGACACTAG,ATTGCACAGTA,ATTGCCCTGGG,ATTGTACGAAC,ATTGTTACACG,ATTTATCTCAC,ATTTGAAAGGG,CAAAAATTACG,CAAACCGTTAC,CAAAGTTATAC,CAACACGAGGA,CAACAGTATTC,CAACTGATGCG,CAACTTGCCGC,CAAGATCCGGC,CAAGGCAACGC,CAAGTTAGTAG,CAATAATGTAC,CAATACACCGC,CAATGCCCCCG,CAATGCGCTAG,CACAAATATCA,CACAGTACAAA,CACAGTACGAG,CACCAAGCTTC,CACCGAGCTAC,CACCGTAATAC,CACCTACCAGC,CACGAACTGCC,CAC…
	CCTGGGAATTA,CCTGTATGTAA,CCTTTTAACAC,CGAAGAGGATC,CGACGCTATTC,CGACGTAAGTC,CGATAAGTCGC,CGATCTGTTAC,CGATTAGGGAC,CGCATTAGTTA,CGCGGATATAG,CGCGTATTTCC,CGCTAAAAGTA,CGCTCCAACAC,CGCTTACATTC,CGCTTGGGAGC,CGGCATCACTA,CGGCGTAGGTC,CGGCTCTCCAA,CGGCTTGAAAC,CGGGCTATAAA,CGGGGTGAAAA,CGGTACACCGC,CGTAAACGAGC,CGTACAGCTAG,CGTCAATGCTC,CGTCGTGACAA,CGTGAATCCTA,CGTGCAAATTC,CGTGGTTAAGC,CGTGTACTAGC,CGTTCCTCTAA,CGTTGGTTGAG,CGT…
	GCAAGCGAGTA,GCAATTTGCTA,GCACCGAGCTA,GCACGAATGAC,GCACTATACGC,GCAGACTAGGA,GCAGACTTCTA,GCAGAGGACAA,GCCCGAATTAC,GCCGTCTAGAA,GCCTAAGTTCA,GCGAATTCCAA,GCGCAGGTTGA,GCGTGATAAAC,GCTAACATAAA,GCTAAGTTCTA,GCTAATGGGAA,GCTAGGTGTGA,GCTATAAGTGA,GCTCTAGGTAA,GCTGAAGTGTA,GCTGTACGTGA,GGAAAGACTGA,GGAAGATTCCC,GGAAGCCTTAC,GGAATTACTAC,GGACAAGACCA,GGACCGACTAA,GGACTCCCCTA,GGACTGTTGTA,GGAGAAAGCAC,GGAGAACAAAA,GGAGGGATCGA,GGA…
Cefoperazone-sulbactam	AAACCGTAACG,AAAGAGCGGGG,AAAGGATCTTG,AAAGGGCGAGG,AAAGGTCGGTG,AAAGTTCGTAT,AAATACTTCGC,AAATAGGTGTA,AAATCGACACC,AAATGCCGTCG,AAATGTGCTGA,AACAACGCGGA,AACAATGGAGA,AACACGCTTTC,AACACTGCACC,AACAGAGGAAA,AACAGTCCAGG,AACCGATCCAA,AACCTACTGGG,AACCTCCACGT,AACCTCTTAGC,AACGACGTATG,AACGAGTATAC,AACGCACGGTC,AACGGAGAAAC,AACGGGCGACT,AACGGTTCGAT,AACGTACTACC,AACTGCCTCCT,AAGAATCCTAG,AAGACACCAGC,AAGAGTGGGCA,AAGCCCCGGCA,AAG…
	ACGAATGAGGG,ACGATCTGGCT,ACGCACGAAAA,ACGCCACTTCT,ACGCGGACTTC,ACGGCAACTAC,ACGGCACTACA,ACGGTGGTACA,ACGGTTCAACT,ACGTAAGGATG,ACGTACCAAGG,ACGTAGGAACT,ACGTATCGTCG,ACGTCAGCGAT,ACGTGAATCAA,ACTAACAACAG,ACTACATTTCA,ACTACCGCAGC,ACTACTAACGC,ACTATTGCATA,ACTCAATGGCT,ACTCCCGCGAC,ACTCCTTGTCA,ACTCGTGCGAT,ACTGACACTCT,ACTGATCCGTA,ACTGGACTTCC,ACTGGTAGCCC,ACTGTCGATCA,ACTTCTCCTGC,ACTTTGCGGTG,AGAATAGCGAA,AGAATTGTCCT,AGA…
	ATCGAGATGCA,ATCGGAGACGA,ATCGGTGTAAG,ATCGTTCGACC,ATGAAATTCTC,ATGGCGGGCTC,ATGGCTCGGCA,ATGGTCGGAAG,ATGGTTCGGTC,ATGTACGAGCA,ATGTCATTCTG,ATGTCGGTCCC,ATGTGACAACG,ATTAACAAACA,ATTCACTGACG,ATTCGCGCACA,ATTCTCAGTAA,ATTGAAAATCG,ATTGAGGCGAA,ATTGTAGATTC,ATTTCGCGTCA,CAACATTCCCC,CAACCGACATG,CAACCGACCGA,CAACGCCGTAG,CAACTGCTGCG,CAAGGAAGCAC,CAAGGCTATAA,CACACGCTATG,CACCCCAGATG,CACCGGAGAGG,CACGACCCCCA,CACGCAATGCA,CAC…
	CCTGGACGCCG,CGAAAGGTCCG,CGAACATGATA,CGAACTTAATC,CGAAGCACGCC,CGAATCTCGCG,CGAGACCTTAG,CGAGGGTGCCC,CGAGTAAATTA,CGAGTTCGCAA,CGATCTATCCC,CGATGTGGTAG,CGATGTTATGA,CGCAAGCAAAC,CGCATGAGCCC,CGCCCAAGCCA,CGCCCCGTTAG,CGCCGGGCCTA,CGCCGTACCAA,CGCGTCTCCAA,CGCTCCCTCGA,CGCTGTTTCGA,CGCTTTGCATC,CGGACGCCATA,CGGACTAGTTC,CGGACTTATAA,CGGAGTGCCAC,CGGCTGATGGA,CGGGAGGCAAC,CGGGATCAGTA,CGGGGATTTAG,CGGGGGAAACA,CGGGTGGTGAG,CGG…
	GATCCGAGAGA,GATCGCCGCTA,GATTCCTTGAC,GATTCGCGCTA,GCAAGATCACC,GCAAGGCAACC,GCAGAAGTAGA,GCAGTCATCCC,GCAGTTCCCCA,GCCACTTCTTA,GCCAGGTATAC,GCCCAACATCC,GCCCAGAGCAA,GCCCATGCCAA,GCCCTGAGCTA,GCCCTTATACA,GCCCTTATTCC,GCCGCACGTCC,GCCGCTCCGTA,GCGAGCTGTGA,GCGATATACCC,GCGATTAATCC,GCGGATACATA,GCGGTTACGAC,GCGTCCGGGTA,GCGTCGGATCC,GCTAATCGTGA,GCTACGGACAA,GCTCCTCGAGC,GCTCCTCTGCC,GCTGAAACAAC,GCTTAACCTCC,GCTTCTCTCGA,GGA…
Piperacillin-tazobactam	AAAAGGTGTCA,AAACACTAGCC,AAACCAGGGCA,AAACCATCGCC,AAACCCGATAG,AAACTCGCATG,AAACTGGGGGA,AAAGAGTCACG,AAAGGAGCTCA,AAAGTAGTCAG,AAAGTCTACAG,AAAGTTGCCCC,AACACCGAACG,AACACTCTAGT,AACAGGACTTC,AACATGTAAGG,AACCACTAGTG,AACCAGTACTC,AACCTAGGACA,AACCTTTCATC,AACGAACCTGA,AACGGCTACAT,AACGTCACTTC,AACGTGCAGAC,AACTACTAGTG,AACTCGACAGG,AACTGGCCGAG,AAGAATGTCGA,AAGCCACCGAC,AAGCCGTGTGG,AAGCGAATCCA,AAGCGCTAAAT,AAGGCTAAGTC,AAG…
	AGAATCGGAGG,AGACAGAGACA,AGACATGACAC,AGACGTCCACG,AGACTGGAGGA,AGACTGGGACT,AGAGAGCCCGG,AGAGGCTGGCA,AGAGGGTATCA,AGAGTCACCTA,AGATATTCTCC,AGATGACTTAT,AGATGTCGACG,AGCATAGACAT,AGCATGAGGGA,AGCATTAAGCG,AGCATTCTAAC,AGCCATAGCGA,AGCCCAATTGC,AGCCCGCAAAC,AGCCTCCGAAC,AGCGGAATCAA,AGCGGTCTAGG,AGCTAACACCG,AGCTCGAAAGC,AGCTCGGCGGC,AGGAACAACAG,AGGAACTCGAC,AGGAAGCCTCC,AGGACGCTAAA,AGGACGTGCCG,AGGAGATAACT,AGGAGATTCTA,AGG…
	ATGCTAGGATG,ATGGACCCACC,ATGGCGAAATA,ATGGCGTAAGG,ATGGGTGGCAC,ATGTCAATGTG,ATGTTAAGTGC,ATTAAAGTTCG,ATTAGCCATCC,ATTAGGGCAAC,ATTAGTGGAAA,ATTCCCTGGGC,ATTCTGTATCC,ATTTATCGCTG,CAAACTGAGGG,CAAAGGTCCGA,CAAAGTGCCTA,CAAAGTGTCAG,CAAATACCCTC,CAAATAGTCGG,CAACCAGGCAC,CAACCCCACCC,CAACCGACATG,CAACCGTATAC,CAACGGCTGAC,CAAGACACCGC,CAAGGGGTTCA,CAAGGTCTGTA,CAAGTCCTCCC,CAAGTCTGTGA,CAATCCTAGCC,CAATCTGAGGC,CAATGATAAGG,CAA…
	CCGATAGAACG,CCGATTGTGCC,CCGCAGAATCG,CCGCCTTCGCG,CCGCTAGTTGC,CCGGCGCAAAC,CCGGGACGAGC,CCGGTACAACA,CCGGTGTCGTA,CCGTGCTGGAG,CCTAAGGCTAG,CCTACCCTTAG,CCTATGGTCGC,CCTATGTAACA,CCTGATGCTCG,CCTGGACAGAC,CCTGGACCATC,CCTGGATGTCC,CCTTGTGTTCC,CCTTTAAGCCA,CGAAACCATCA,CGAACATCTAG,CGACAAGGGAA,CGACCGTGACC,CGAGAACAAAC,CGAGCGGGAGA,CGAGCTAATTC,CGATGTACAAG,CGCAGGATTAG,CGCGATCCAAC,CGCGCGGCGAC,CGCGCTTGACA,CGCTAAATTGA,CGC…
	GACTGGCGACA,GAGAAGCGCAA,GAGCATGGCGC,GAGCCTGATGA,GAGTCCTCACC,GAGTGACAACC,GAGTGACACTA,GATAAAAGTCC,GATAAGTGTAC,GATACATAGTA,GATACTATGCC,GATGGCACTGC,GATGGTACACA,GATTACACGAC,GCAACATCGGA,GCACTCCTACA,GCACTTTCGAC,GCAGCCTGACC,GCCCCCGAAAC,GCCCCTAGAGA,GCCCTTATCCC,GCCGATTGCGA,GCCTCGACAAC,GCGAGATCACA,GCGATATCAGC,GCGATCCCAAC,GCGCACAAGTA,GCGCATCGACA,GCGCCTAGGAA,GCGCGGGGACA,GCGTCCACCAC,GCGTCCTTTGA,GCGTTAGGCAC,GCT…
Amikacin	AAAAGTCCTGG,AAACCCCGCGT,AAACTAAGCCG,AAAGTACACGG,AAATAGGCGGG,AAATGAACGTG,AACACGCATCC,AACCCCTGATT,AACCCGGCATC,AACCGAAATTC,AACCGACGGCT,AACGAGCAGGT,AACGCGGAGTG,AACGGATAGAT,AACGTATGCAA,AACTATCTGTG,AACTCATCGGG,AACTCCCCCAC,AACTCCGCCTC,AACTCTGGGAT,AACTGCCTTGT,AACTGGGCGGA,AAGAGCCAGGC,AAGAGGCAACC,AAGAGTGAATT,AAGAGTGCGAG,AAGGAGAGGCC,AAGGAGTCTTA,AAGGCCCGGTG,AAGTACGCCAC,AAGTACTCGTA,AATCTTGGGTC,AATGCCCCTTG,AAT…
	AGAGGCCGCTG,AGAGGCTTCCT,AGAGTGTCACG,AGAGTGTGGGC,AGATCCGTCTA,AGATCTATTCC,AGCAGGGGACC,AGCCACCGGGC,AGCCCTATCAG,AGCCCTTCCCG,AGCCGCGCCCG,AGCCGGCAAAC,AGCGAGACCTA,AGCGCTGGTGA,AGCGGCGTCCT,AGCGGGGAAAT,AGCTCCACTTG,AGCTCTCTTCC,AGCTCTGATCG,AGGAAACCAGA,AGGAAGAGTGC,AGGAATGGTAT,AGGACTTGGCC,AGGCATCGCCC,AGGCCAGTGCC,AGGCGGTGACG,AGGGCAGTTGC,AGGGCCAAATA,AGGGGTTGACG,AGGGTGCTCAG,AGGTGAGGAAA,AGGTTGGATAA,AGGTTTTCGTA,AGT…
	CACATCTTAAC,CACCCCCTTCC,CACCCGGCTAC,CACCGCGGATG,CACCGTCTCAG,CACCGTGGGAG,CACCTCTGCAC,CACGAAACCAC,CACGGTGCCGC,CACGTTTCTAA,CACTAGTAATA,CACTGACGCGG,CAGAGCAGGAC,CAGCAGCCGAC,CAGCCACACCG,CAGCCTGGAGA,CAGGACAGATC,CAGGATTGACC,CAGGATTTCGC,CAGTCCCACTG,CAGTGCATAGA,CAGTTCACCGG,CATAGAACGCC,CATAGTGACAC,CATATGGTTAG,CATATTCTACG,CATCCGAAGCG,CATCCGCCTTA,CATCCGCTAGA,CATGCTCCGGG,CATTAACGCGA,CATTAGGATAG,CATTCTAGCGG,CAT…
	CGCAGCGGAGA,CGCATTCTAGC,CGCCACATGAG,CGCCGACTCTA,CGCCGGAGAAA,CGCCGTGCCAG,CGCCTTACCCG,CGCGTTAAGAG,CGCTACCTAGC,CGCTACTGAAG,CGCTCCGATCC,CGCTGATTTCC,CGCTGCATAGC,CGGAAAAGATA,CGGATTACTAG,CGGATTCAGTC,CGGCAAGCGAA,CGGCAAGGAGA,CGGCGGCAATC,CGGGCGATGCC,CGGGCTTCTAA,CGGGGGTAATC,CGGGGTGCGAA,CGGGTAAGACC,CGGGTTGGGGA,CGGGTTTCCAA,CGGTACATGGC,CGGTACTGGCA,CGGTCTTCGAC,CGTAATCGGGA,CGTAGAGAACC,CGTAGAGTCCC,CGTCATCTGTC,CGT…
	GCCACATCCGC,GCCACTGCTTA,GCCCCCAAAAC,GCCGAATACAC,GCCGAGACCGC,GCCGATCCGAC,GCCGCCGCAGA,GCCGGCAAACC,GCCTCCCCAGC,GCCTGAAGGCC,GCCTTCCTCCC,GCGAACTGACC,GCGAATGACCA,GCGAGACCTAC,GCGAGCATAGC,GCGATAAGCGC,GCGGAACTACA,GCGGAATCGAA,GCGGATATATA,GCGGCCTCTCC,GCGGTGTGGGA,GCGGTTCCTGA,GCGTCCTCCCA,GCGTCTTCTCC,GCGTGTACCCC,GCGTTACAACC,GCGTTCCAGAA,GCTAAGTGCTA,GCTAGCATCAC,GCTATTTGTCC,GCTCCCCTCCC,GCTCCCGTTCC,GCTGGAGGCAA,GCT…
Ciprofloxacin	AAAAACACTGC,AAAAATCCAGC,AAAACCACTGG,AAAACTAGTTA,AAACCACTGGA,AAACCGGATGT,AAAGAGTTACG,AAAGTGATGGT,AAAGTGCCGAC,AACAAACGTCT,AACACGCTGAA,AACATACTACA,AACCTCAATCG,AACGAAATGGG,AACGAATATGA,AACGGAGCATA,AACGGTCAGGG,AACGGTGTGCA,AACGTGTTCCA,AACTAATTCGT,AACTCTAGGGG,AACTGTAGGAA,AACTGTCCTAC,AAGCACCACCG,AAGCCTTGCGC,AAGCGGAAGTG,AAGCGTAGAGC,AAGGCCCATTC,AAGGGGGGATT,AAGGGTTAGTA,AAGTCGCGCCT,AAGTGGGCACT,AATAAAGGCAG,AAT…
	ACTAGTGTTGC,ACTCCCTTTGA,ACTCGATGGCA,ACTGAAAACCG,ACTGAACAAAC,ACTGAGCCTGC,ACTGATGGAAA,ACTGCACAGCT,ACTGCGTGACA,ACTGCTCTGTC,ACTGGACCTAA,ACTTAGTAGCG,ACTTTACCGTG,ACTTTTGAACT,AGAACCTGTTA,AGAACGTCCTC,AGAAGGTCAGA,AGAATTGCAAC,AGACAACATTA,AGACCCCGGGG,AGACCGGTAAA,AGACGAGTGAC,AGACTAGGAAA,AGACTGTGTAT,AGACTTAGTAT,AGAGACGACGC,AGAGAGTATAT,AGAGCCAATAC,AGAGCCCGCGA,AGAGCTGGTAT,AGATATGACGA,AGATGCCGATG,AGCACGTACTC,AGC…
	ATGGCAGAACG,ATGGGTACCAA,ATGGTCTCGGC,ATTAGAGGGTC,ATTAGTATACA,ATTATATGTCC,ATTCAGCGTGG,ATTCCTCTTAC,ATTGAAGCGCC,ATTGAATCCAA,ATTGAGCCGAC,ATTGAGTAGAA,ATTGAGTGGAC,ATTGATACGGA,ATTGCATTCTA,ATTGGGACGTA,ATTTTCGAGAC,ATTTTTCGACC,CAAACCTATGG,CAAATACGTCA,CAACCATACAG,CAACGCTGCCC,CAAGCGTATCG,CAAGCTACAGC,CAAGTGTAGGC,CAATAATGCGA,CAATAGGTTGA,CAATTAGAGAA,CAATTCATCTC,CACACAGACTA,CACAGCCAAGC,CACATAGCAAA,CACATCTCCAG,CAC…
	CCGTTTGTAGA,CCTAAGATCCC,CCTACCAAAGA,CCTCGTGTTAC,CCTGCACCGAG,CCTGCCGTGCC,CCTGGTAGGCG,CCTTAGTAACC,CCTTCAATGGC,CCTTGCCCAGC,CGAACGTTTAC,CGAACTGGACA,CGAATTTCTTA,CGACCAAAACA,CGACGCAGTAA,CGATCATCAAA,CGATCTTCGGC,CGATTTTTGAC,CGCATTCCCCA,CGCCCACGGCG,CGCCTAACTAC,CGCCTTTCATA,CGCGCTGGCCC,CGCTCACGCCG,CGCTCTGCCAA,CGCTGTTGTCC,CGCTTAAGCAG,CGCTTGCCATC,CGGAAATACAC,CGGAAATGTTC,CGGCAGTACCA,CGGTTATCGAC,CGGTTTGAGCA,CGT…
	GAGATCCGAAA,GAGCATGATCC,GAGCTTAGCCA,GAGTTCAGGAA,GATAAGCAAGC,GATCCTAGAGC,GATGCTAAGAA,GATGTCCCCCA,GATTGAGGTAC,GATTTACGACA,GATTTCATAGA,GCACCTGCTCA,GCAGCATCTCC,GCAGTAAGCAA,GCAGTCGCGAC,GCAGTTGAGCA,GCATCGACGAA,GCATGGTCGAC,GCATGTAGCCC,GCCTCGGGTCA,GCCTGCTGCGC,GCGCGTATGCA,GCGCTGGGCAA,GCGTACTATAA,GCGTCTTCACC,GCGTGCGAAAA,GCGTTATCGAC,GCTAAATGAGC,GCTAGCTGAGC,GCTAGTATAGA,GCTATTGGCGA,GCTCTCAACAA,GCTGATTAATA,GCT…
Levofloxacin	AAAAAGACTAG,AAAAAGCGTAG,AAAACCCATGA,AAACAACACTT,AAACGAGGGAA,AAAGAACGATC,AAAGCACCCTC,AAAGTTCTAGG,AAATAGAACGA,AAATCAGGGTA,AAATCTGAAGT,AAATGATGTGT,AACAAAAGTAC,AACACAAACCC,AACACGTCCCT,AACAGCTCTCG,AACCCCGAGAA,AACCCCTAGAG,AACCCTAGGCA,AACCTTTCTAT,AACGAAGTAAA,AACGCTTGCAG,AACGGCGCGTA,AACTCGGAAAG,AACTCTTAACA,AACTGGACCGC,AACTTAGTGGC,AAGAACCGTTG,AAGAGGAAAGC,AAGAGGCGGCC,AAGATACATTG,AAGCCAGTGTC,AAGGAGAATTC,AAG…
	ACTAACCGTTG,ACTAAGTCGCA,ACTACCCTCGG,ACTACGCGAGC,ACTAGCAAGGA,ACTAGCGCACA,ACTAGGACCGA,ACTCACTTATG,ACTCCTGCGTG,ACTCTTTTATC,ACTGAAAGCAT,ACTGCCACAAA,ACTGCGGAGCA,ACTGGCGAACG,ACTGGTTAACG,ACTTCCCGGGC,ACTTTCCGCTG,AGAACAACCCC,AGAACCGTCCC,AGAAGATCGTC,AGAAGTTCCTC,AGAATCCTGAC,AGACAAACGGC,AGACCGAAATA,AGACCTCAACT,AGAGGCAAACC,AGAGGGCAGAC,AGAGGGCCTCA,AGAGGGTTAAA,AGAGTGCGCGC,AGATCAAGGTG,AGATGTGCTGC,AGCACTCTAGC,AGC…
	ATTACGCCGCA,ATTATATATGC,ATTATATGCCC,ATTATCCTATA,ATTCAGAGGCG,ATTCCCGAGCA,ATTCCCTCCTA,ATTCTAGTTGG,ATTGACATATC,ATTGGTTGCTC,ATTTGGAGTTA,ATTTTGTACGA,CAAACATGAAC,CAACAACTGTC,CAAGAGACAAG,CAAGCGTCCTC,CAAGGACCCTC,CAAGTGGCCCA,CAATTGTCAAA,CACAGGACAGC,CACATATCACA,CACCAGGTGGC,CACCATGTTAG,CACGAACTTCG,CACGAGAACCG,CACGCAAACCA,CACGCGATATA,CACGCGCCAGC,CACGGTCACCC,CACGGTGTACC,CACGTAGGTCC,CACTAGTGTAG,CACTGCGGAGG,CAG…
	CCTATGTATGC,CCTCACCAAAG,CCTCACCCATC,CCTCATCTTGC,CCTCATGAAGA,CCTCCAATGCG,CCTCTAGAACC,CCTCTAGTCTC,CCTGAGCCTCC,CCTGCAACCGC,CCTGCACCCTC,CCTGCTTAACA,CCTGGTACAAC,CCTTGAGAGCA,CCTTTTCGCAA,CGAAAATCCGC,CGAACGCTTTA,CGAACGGCGAA,CGACCAGTGAA,CGACTGGCTAA,CGAGGCTCAAG,CGAGTGCAGAG,CGATCATCGTC,CGCAACAGGCA,CGCAAGACCGC,CGCAGTAAGCA,CGCGTGCCAAA,CGCGTGTGATA,CGCTAGGACAC,CGCTCACAAAA,CGGAACTAGTC,CGGCAATCCCC,CGGCCACCTCC,CGG…
	GACGGGTCAGA,GACGTGTGCTC,GACTAATAATC,GACTAATCTGC,GACTACAGAAA,GACTACCCCAC,GACTATGGATC,GAGCGTACAGC,GAGGGCTGATC,GAGTATGGAAC,GATATCGAATC,GATCTTGGCCA,GATGAAAAGCC,GATGATCGCCA,GATGCTTCGCA,GATTCTGGAGC,GCAACGAGTCA,GCAGTTGCGTA,GCATAACGCGC,GCATGGCAGCC,GCATGGTTCCA,GCCAAACCGAA,GCCCGCAATCA,GCCTGCCGACA,GCGCATGTCAC,GCGCCATAAAC,GCGCCTGCAAC,GCGGGGAGGCA,GCGGGTTCCCC,GCGGTAACCGC,GCGTAAAAGCA,GCGTCGTGTAC,GCGTGTCTATA,GCT…
Minocycline	AAAAACTCCGG,AAAATCGCGAA,AAAATTGGAGG,AAACGGGGAGC,AAAGCACTGGT,AAAGGACTGTG,AAAGGAGCCCT,AAATCGTGGAA,AAATGAACTGC,AACAATCACAT,AACAGCTGTAC,AACCGAGAGTC,AACCGGAAAGG,AACGATGGAGG,AACGCGCATGG,AACGGTCCCCA,AACGGTCCGTA,AACGTAACAGG,AACTCCTAAGA,AAGAATCGCTA,AAGCCCCATCC,AAGCCTCTAGC,AAGCGAGACCC,AAGCGGGCCCA,AAGCTAAGGAT,AAGCTCTGACG,AAGGACGACGC,AAGGAGCTTGA,AAGGGTTCACA,AAGTCTAAGAG,AAGTGCCTTGA,AAGTGCGACCC,AAGTTGCGGCA,AAT…
	AGACACGTGGC,AGACATACGGA,AGACCGAATGA,AGACTATAGTC,AGAGCGATCGG,AGAGGCTTACT,AGAGTAGAACT,AGAGTCTCGCA,AGATAGCTCGA,AGATCCGTGCA,AGATTAGGAAC,AGCAAGGCACC,AGCAGCGGTAC,AGCCCAAACGG,AGCCCCTAACC,AGCGAAATGAG,AGCGATTCGCG,AGCGGTTTAGA,AGCTATAGCTA,AGGAAACATCC,AGGATAGAATG,AGGCATACGGA,AGGCGTGACAG,AGGGAGACCCT,AGGGAGCCGAA,AGGGGTAAGAG,AGGTGAACCTG,AGGTGATGCCA,AGGTGGCCTCA,AGGTGTAAAGC,AGTAGAATTCA,AGTAGTGGTCC,AGTATACGAAC,AGT…
	CAAGTTCTACC,CAATACTAGGC,CAATCGGATGA,CAATTATACGA,CACAACACGTA,CACAACCATGA,CACAGGGCATA,CACAGGTATTC,CACATGGGTGA,CACCCCTATAC,CACCTCCCTAC,CACGTGTCCGG,CACTATGATTC,CACTCCTCTAG,CACTTCGACCA,CACTTGTCTCC,CAGAATTCTGA,CAGATACGTGG,CAGATTCTCTC,CAGCGAAAGTC,CAGCGCGGCTA,CAGGAGACTCG,CAGGAGAGGAG,CAGTACCACTA,CAGTGAGTCCG,CAGTGGAGCAC,CAGTTCACTGC,CATAGTATCAG,CATATGAGCAC,CATCGAGTACA,CATCGTATGTA,CATGCGCTGCG,CATGGTCAACC,CAT…
	CGATAGACACG,CGCAAACCCAA,CGCAAGATCTC,CGCACCTTGCA,CGCAGAGGATA,CGCCGCCCTAA,CGCCTATCCCC,CGCCTTAGTGA,CGCGAATTATA,CGCGCGTAGAG,CGCGCTGGGTA,CGCTAAGTCCC,CGCTATAGGAC,CGCTGTGCCCA,CGCTTCTTGGA,CGGACACAACG,CGGACGACTAA,CGGACTTGCTA,CGGCTAGTTCA,CGGGACATAGC,CGTAAGTAGCC,CGTACGCGGAG,CGTCTTAGAGC,CGTCTTCCAAC,CGTGAACGTCC,CGTTACGTCCA,CGTTCAGATCC,CGTTGAGATAC,CGTTTGGCAGC,CTAAATGGAGC,CTAATGTAAAC,CTACAACTCGC,CTACCCTCCTA,CTA…
	GAGTCGTGGAA,GAGTCTCGACA,GATAAAATCTA,GATAGATTGGA,GATAGCGTACA,GATATCTGACC,GATCTGCGCTA,GATGACAAGAA,GATGTGAGTCA,GATTATGTCCC,GCAATCTAACA,GCAATGCGGCA,GCACAGAACGA,GCACTCGAAGA,GCAGAGTTGCC,GCAGCACGGAC,GCAGTAGTGCC,GCATAGCAGCA,GCATCACGTCC,GCATCCGATAC,GCCAAGCCGGA,GCCACCCCCAC,GCCAGCATCTA,GCCTCAAGGAA,GCCTCTACGTA,GCGAAAATCGA,GCGAGTATCCC,GCGATATTTGA,GCGCAACCTAA,GCGCTCTTACC,GCGCTTCTAGA,GCGGATGAACA,GCGGCTTGCTA,GCG…
Trimethoprim-sulfamethoxazole	AAACAAGGACG,AAACTGCTAGC,AAAGATAGTCC,AAAGCCCTCGC,AAAGCGGTCTA,AAAGGGATAAC,AACAAGGACGA,AACCAGGCCCG,AACCCTCGGTC,AACCTCGGGAA,AACGAGTGGCG,AACGGGACGTT,AACTCTCTAAG,AACTGCAGCTG,AACTGGCGTGA,AAGAGCGGCGC,AAGAGTCCTGC,AAGATAACCGC,AAGCCAGGTGG,AAGCCCAGCTG,AAGCGCGGCGT,AAGCTAAGTCG,AAGGACTCATA,AAGGAGTCCTC,AAGGGCTCCAA,AAGGGGAAGGA,AAGGTTCGCGG,AAGGTTGCCGG,AAGTACTAGGA,AAGTGAGTCAA,AAGTGATTCAC,AATACATGTCT,AATACGAGAGA,AAT…
	AGACTGTACAA,AGAGCGGCGCA,AGCACCGAGAG,AGCCCTACACA,AGCCGCGAGTC,AGCCGGTTACA,AGCGACATCAG,AGCGACCCCGC,AGCGCCCGCAG,AGCGCCGGCGG,AGCGGAGGATA,AGCGGGGTCGC,AGCTAGTTTAC,AGCTATAGTCC,AGCTTGTAGGC,AGGAAGCCCCG,AGGAGCACTGG,AGGAGCTAATC,AGGCCGACGCC,AGGCGAGAGAG,AGGGCCGTCTC,AGGGCTCCAAG,AGGGGCGCGGC,AGGTCACAGCG,AGGTCTTCCGA,AGTATGCAGTG,AGTATTACACG,AGTCAATCGCC,AGTCACGACGA,AGTCCTGCAGA,AGTGCCTAGTA,AGTGTCGGGCG,ATACCGACGAG,ATA…
	CAGTCCAGGTC,CAGTCGCCCTA,CATCACACATG,CATCACTCTGA,CATCAGCGGGA,CATCATCCAGG,CATCGAGAAAC,CATCGAGCGCC,CATCGCTGCAC,CATGCCTAGCA,CATGGAGATGG,CATGGCGGCGC,CATGGTGACGG,CATGTGCTCCC,CATTAGTCGGC,CATTTGTACGG,CCAAACTCCCC,CCAAAGGAGAC,CCAACGCCGAC,CCAAGAACCCA,CCAAGAGCTTA,CCAAGGATTTC,CCACCGCCCCG,CCACGCCGCGC,CCACGTTAATA,CCAGAAGTGTC,CCAGACACAAG,CCAGACGGTTA,CCATCCCCAGC,CCATCCGGACG,CCATGGTGACG,CCCACAGACTC,CCCAGCGCGCA,CCC…
	CGCAACCGCCG,CGCACAATCTC,CGCACAGTCAA,CGCCACCCGCA,CGCCGCTCTTA,CGCCTCATGAC,CGCCTCGAAGA,CGCCTTGTCTC,CGCGACAAACC,CGCGATCGGCA,CGCGCCTGGAG,CGCGGAAATCC,CGCGGCGCGGC,CGCTCGACGAG,CGCTCGATGAC,CGCTCTATCCC,CGCTTCGCAGA,CGCTTGTCCCA,CGGAAATGCGA,CGGAAGCACAG,CGGAAGGGGCA,CGGACCGGCCG,CGGAGAATCTC,CGGCAAGCGCC,CGGCAAGGTGC,CGGCAATGGGC,CGGCCGCCCGC,CGGCCTCCGCA,CGGCGATCGAA,CGGCGCGAGGC,CGGCGGAGGAA,CGGCTAGCGAG,CGGGACTCGGC,CGG…
	GACAGGGCGTC,GACCGAACGCA,GACCGGCTTAA,GACGCGAGGCC,GACGTCGTGGA,GACGTGCTATC,GAGAAAGCCGC,GAGAGCTTAGA,GAGCCCTTGCC,GAGCCGGCGGC,GAGCTCGTAAC,GAGGATACCCA,GAGTGACGGAC,GATCATGCCTA,GATCCGCGGAA,GATCCGGTGCA,GATCGGGAACA,GATGTCGGACC,GATTCAGTGCA,GATTCCAACAA,GCAACCGGCGC,GCAAGACGGGC,GCAAGTATCGC,GCACCGGAAAC,GCACTCGACGC,GCATCAGAATA,GCATCAGGGCC,GCCAAGGCGAA,GCCAGTTAGTA,GCCCATCGTTA,GCCCCAGAAGC,GCCCGGCGCGC,GCCGCCCGTGA,GCC…

## Sheet: Imipenem
Feature	Importance
GCCCGCCCTAA	0.00380228
GGTCCAGGGAC	0.00380228
TAGATATGTAA	0.00380228
CCCGTGGAGGG	0.00190114
CCTGACAGCCA	0.00190114
CGAAAATTTCA	0.00190114
CGAAAATTTCC	0.00190114
TCAGAATAGGA	0.00190114
GTCATATTTGA	0.00190114
AGTAGTCATGA	0.00190114
ACCAGCTGTTA	0.00190114
AAATTGAAGAA	0.00190114
CATACTTCATC	0.00190114
CCTAACGGAGA	0.00190114
AATTTGCACTC	0.00190114
AGCAAAATGTC	0.00190114
AACTAATTGCC	0.00190114
GAGAAATACTA	0.00190114
AAGAATAACAG	0.00190114
TCATTTCGAGA	0.00190114
AGGGGGGGCAT	0.00190114
GAATATTGGCC	0.00190114
ACGCGGCCACT	0.00190114
CAGCTCTTAAC	0.00190114
ATCAGTCAACG	0.00190114
GGTAAACCGAC	0.00190114
CTGTGCGCCCA	0.00190114
CACCGATCCAG	0.00190114
CGGTGTAGATA	0.00190114
AGACACGGAAA	0.00190114
TCTATCAGCAA	0.00190114
AACATGCTTGA	0.00190114
GTTGGAGCGGA	0.00190114
ATTCCTTCAAG	0.00190114
ATGGTATACCA	0.00190114
AGATCTACGCA	0.00190114
TCAGTGAAAGA	0.00190114
GGAACGATTAA	0.00190114
ATAACTGTCTC	0.00190114
GGAGGAGGCAC	0.00190114
CATCCAGAAGA	0.00190114
TAAGAGTTAGA	0.00190114
AGAATGATGAT	0.00190114
AACGCCAAAAT	0.00190114
GATCGGGAAAC	0.00190114
AACAAAAGAGC	0.00190114
ATCGTTATGAC	0.00190114
GCTCGCTCAGC	0.00190114
CTTAATTAATC	0.00190114
ATTCCTGTTTA	0.00190114
CCACTAGTGCA	0.00190114
GGTTTCAATTA	0.00190114
CTACGTGACTC	0.00190114
CGCTTCTATAC	0.00190114
GCTCGCGGACC	0.00190114
AGCGAATTATA	0.00190114
TGGTAGTGGAA	0.00190114
TCCAGGGTGCA	0.00190114
CGCAGTTGGAG	0.00190114
CAGACTCTGTA	0.00190114
AAACTATCTTG	0.00190114
AATTTACGAGG	0.00190114
AATCAAACGCT	0.00190114
CCGCGGTAGAC	0.00190114
ATGCAACCTTA	0.00190114
CCCCCTTGAAC	0.00190114
GGGAGGCTTCA	0.00190114
AGAACTGATGA	0.00190114
AATATAGCTGG	0.00190114
AGGGCCCGCAT	0.00190114
ATAGGTCTGGG	0.00190114
TGTTAATTGAA	0.00190114
AGCGAGCTACG	0.00190114
ATGGCATAAAG	0.00190114
GTGGCCTGCTA	0.00190114
AACCTTGCACA	0.00190114
GTCCGGTCCCA	0.00190114
ATATTACGCCC	0.00190114
CTCCGCTAATA	0.00190114
ATACTATGTGC	0.00190114
AATAACTTGCC	0.00190114
AATCGAGATAT	0.00190114
CGACTTATTTC	0.00190114
CGCAAGGACCG	0.00190114
AACGCATGCGG	0.00190114
CATTAGCGAAA	0.00190114
ACTGCGGCTAA	0.00190114
GAACCTAACTA	0.00190114
TGATCCCCCCA	0.00190114
ATCGCCATAAG	0.00190114
CGATAGGTAGA	0.00190114
CATTCTAACGC	0.00190114
ACAGCGAGCCA	0.00190114
GCGGGGCTTTA	0.00190114
AAATGGAGCGA	0.00190114
AAAGAATTGGA	0.00190114
CCTTGGCTTAG	0.00190114
AAATTATGACG	0.00190114
CAGTATGAAAG	0.00190114
AGCGGACCCCA	0.00190114
GGACTGCAAAC	0.00190114
AATATTTCGTC	0.00190114
AACGTCACGGC	0.00190114
CAGGACTAAGC	0.00190114
CGGACGGCCGA	0.00190114
GTCAAAACTTA	0.00190114
CTAATGTGACA	0.00190114
AAGACGCAGCT	0.00190114
CACTGCTCTCC	0.00190114
ATAGAGCAGGG	0.00190114
CCGGAGTTCTC	0.00190114
GACTTTAAAAC	0.00190114
GGTGGTTGTGA	0.00190114
CAGTGGTTAGA	0.00190114
ATTTCACTCCA	0.00190114
AAGATTATCGG	0.00190114
TGGTTTCTGAA	0.00190114
ACATATGAGAA	0.00190114
TGGATGCTTAA	0.00190114
CCCGCAATAAC	0.00190114
GGTTTCGATTA	0.00190114
ACGAACGTGGG	0.00190114
GAAACATTAGA	0.00190114
CCCAATGCCCA	0.00190114
ATTACGCTCGA	0.00190114
CGGTGGTACTC	0.00190114
AAGACACCGAA	0.00190114
TCATCCGGCAA	0.00190114
ACGAGTCCAAT	0.00190114
CGAGCTACGAC	0.00190114
ATGGCACTATC	0.00190114
GGTCGGGGGAA	0.00190114
CGGCCATGACC	0.00190114
ACGACGCATAT	0.00190114
ATCGCTATTGG	0.00190114
AGACGTAATAC	0.00190114
AGGAAGCCTAT	0.00190114
AACCAGTTGTG	0.00190114
CGTGTCACTGC	0.00190114
CAGCTTATGAG	0.00190114
GTACGACCAAC	0.00190114
AGGGACTTCTC	0.00190114
AAATAATGACG	0.00190114
ACATGGGAAAC	0.00190114
GTTTAAAAACA	0.00190114
GCACTTGGGCC	0.00190114
TATCAGCCCCA	0.00190114
GAATCAACAAA	0.00190114
AACATCCTACC	0.00190114
CCTTGGACTAG	0.00190114
ATGTCACCTTA	0.00190114
AACACGGATCT	0.00190114
AGTCATTGGTC	0.00190114
AGTTGGGCGCC	0.00190114
ACAGCTCCGAT	0.00190114
TATAATCCATA	0.00190114
CCTCGGTGTAA	0.00190114
ACACGCGCAAT	0.00190114
AAAGCGTCCTT	0.00190114
CATGCTAAATA	0.00190114
GTCTAGCGCAC	0.00190114
ATATCATAAGG	0.00190114
CTGTTTCCTGA	0.00190114
GCACATTAAGA	0.00190114
TAGAAAGCTCA	0.00190114
CTAAAGCGTGA	0.00190114
AGAATTCGAAT	0.00190114
AATAAGACGAA	0.00190114
CAGGTCCAACC	0.00190114
ATCTTTCTTTC	0.00190114
CAGCTGAGGTC	0.00190114
AGGACCGTGGA	0.00190114
CTGTAAACCGA	0.00190114
TATATAACGGA	0.00190114
GCGTGAAGATA	0.00190114
AAAAGTGTTTA	0.00190114
GGGTATTGATA	0.00190114
CTGACACCCCC	0.00190114
AACCGGTATAC	0.00190114
AGCTTACAATA	0.00190114
AGCTTCGAACC	0.00190114
AGGGACATCCC	0.00190114
ACCGTGGGGGA	0.00190114
AGTAAAGGACT	0.00190114
TCACCCGTAAA	0.00190114
ACGCCGTTAAA	0.00190114
AAAAGGGGTGA	0.00190114
ATTTTCCTTTC	0.00190114
ACGATTTCGCA	0.00190114
CGTACCACTGC	0.00190114
CGATTAAACTA	0.00190114
ACCCCATACGG	0.00190114
TGATGCGTAAA	0.00190114
CTACGGTGGGC	0.00190114
AGTGCGTACGG	0.00190114
ACATTCTGCAA	0.00190114
ATGACACAAAT	0.00190114
AAACACCGATG	0.00190114
ACCGCAGTACG	0.00190114
AATGAATTCTG	0.00190114
AGCAAGCGCTA	0.00190114
CACACTCACCC	0.00190114
GCACCCACCAA	0.00190114
ATCGTCACACA	0.00190114
CCCAGTCCTCC	0.00190114
ACGCGTTTCAT	0.00190114
AGCGCCAAATA	0.00190114
AGGATTCCTCC	0.00190114
ATATGGCACAG	0.00190114
GAAGATCAATA	0.00190114
GCAATTGTCCA	0.00190114
ATTCTGCTGTG	0.00190114
CGAAGACTACA	0.00190114
CTCGTTAAACA	0.00190114
GGTGGGCTAAA	0.00190114
TAGGGCTGATA	0.00190114
AGAGCGCAATG	0.00190114
TCGTGGGCTCA	0.00190114
AGTTCTCTCAT	0.00190114
AACTTCAACCC	0.00190114
GAGCATTATGC	0.00190114
AACGAAATACT	0.00190114
ATATCTTATTA	0.00190114
TAACCCAATGA	0.00190114
GTGGGAAAGTA	0.00190114
TGACGAGAAAA	0.00190114
GGAGTGAACCC	0.00190114
AGGCTGAAATC	0.00190114
CCACAATGAAA	0.00190114
AATCAAGATCC	0.00190114
ATGCGAGATGA	0.00190114
CAGTCTGAGTC	0.00190114
ACAGACATTTC	0.00190114
ATTACTATAAA	0.00190114
TTCCGTTTCAA	0.00190114
CGTAAGGCAAC	0.00190114
GCTGCTCATTA	0.00190114
CGTCGTAAGAC	0.00190114
TACTGGTTTGA	0.00190114
ACTACGACTAA	0.00190114
CATATGACTTC	0.00190114
AAGGTGTCTGT	0.00190114
GTAGGGTTTGA	0.00190114
AAATGCGTACA	0.00190114
CAGGTGACCCC	0.00190114
CATTAACCGAC	0.00190114
GACGTCAATCC	0.00190114
CTTTGCGAGTA	0.00190114
AAACCCCCTAC	0.00190114
GCGGCAGAGTA	0.00190114
ACCCGCTATAA	0.00190114
ATACTACCTGC	0.00190114
ACGCCCCGGGA	0.00190114
GTGGTCGGAGA	0.00190114
CTTCGCTAAAG	0.00190114
ATTCACGACTA	0.00190114
TAGGGATGTGA	0.00190114
GCTGTCAACCA	0.00190114
ATAAGACATTG	0.00190114
GCAGAGGTACC	0.00190114
AACCCGATCTT	0.00190114
ATTAAGCTCCG	0.00190114
AGGTTCGATTG	0.00190114
CCTTGTAGCCA	0.00190114
CCCAGTCAGCG	0.00190114
GTTACATCAAA	0.00190114
CCAAAGAAGAG	0.00190114
CAGCCTCCTCG	0.00190114
ACGTTCGGCAG	0.00190114
CCCTATATGAC	0.00190114
TGATGCCCCAA	0.00190114
CAGCACTTCCA	0.00190114
AACATTTAGTT	0.00190114
CCACTTCATTA	0.00190114
ATACAGGCGAT	0.00190114
ATGTCCACTCA	0.00190114
CACTCCTACGC	0.00190114
CTGCTTGTGAC	0.00190114
AGATTTGGTAA	0.00190114
TATGTTCCGCA	0.00190114
CAACTGGTCAA	0.00190114
CTCCTAATCAC	0.00190114
GATGGGTCACC	0.00190114
CTTGTCAATAA	0.00190114
ATGTCTTATGG	0.00190114
ACGATACGGAC	0.00190114
GGTTAATCCTA	0.00190114
ATGCGTCTACA	0.00190114
TAGTTCGAAAA	0.00190114
AATTATTTTAG	0.00190114
ATTCCTGACGA	0.00190114
AATACTTCGAG	0.00190114
ACGACCATCTG	0.00190114
ACAGCTGGGTC	0.00190114
AAGAATCACAT	0.00190114
CCCACCTAGAA	0.00190114
GCTTTATAGCA	0.00190114
AAGGGGCTGAG	0.00190114
ATTACCACGGA	0.00190114
ACCAGGATCAA	0.00190114
AATCGAGTACA	0.00190114
CCCCCAACTTC	0.00190114
AAATATTAAGA	0.00190114
CTCGAACAGAA	0.00190114
GCAAGGGATCC	0.00190114
GCCTATCTACC	0.00190114
AGCCCTCCAGA	0.00190114
ACGATCTTAAT	0.00190114
CTTTTAGTGAC	0.00190114
ATGTCTGCGCC	0.00190114
GTTGGGTGTTA	0.00190114
ATAGTTGATCA	0.00190114
AGGAATTAATA	0.00190114
GCCAATATCCA	0.00190114
CCCATGGTCTC	0.00190114
ACAAAATCCAC	0.00190114
ATCTCACTGAA	0.00190114
ACAAAATCCGG	0.00190114
CTAGAGGACTA	0.00190114
TAGATTTTCGA	0.00190114
AAATATATCCT	0.00190114
GTTGACTTTCA	0.00190114
GAATCTATACC	0.00190114
ATTATAAAGGA	0.00190114
GCCCAGCACCA	0.00190114
GCCTTCTATAA	0.00190114
AGAAAATTGAA	0.00190114
CAATCATCATG	0.00190114
GCTTCTTAATA	0.00190114
TCCCACGACGA	0.00190114
GAACCGTATGA	0.00190114
TGCAGGTAACA	0.00190114
ATGCATAACCG	0.00190114
ATACGTTTCTC	0.00190114
ACTCCAAAAGG	0.00190114
CTTGGCCGTGA	0.00190114
GCACTGAGGCA	0.00190114
CACTGAGTGGG	0.00190114
CACTATTAATA	0.00190114
TATCGGAACGA	0.00190114
ATGGCTGTAAG	0.00190114
AAATTCTACCG	0.00190114
AAGAAATATGC	0.00190114
CGGAACAGGGA	0.00190114
GCGCAAGACCC	0.00190114
AGAAACGCTTA	0.00190114
ACATAAGGAGA	0.00190114
ACGATAAAAAG	0.00190114
AGTGTCTCCAG	0.00190114
GATACTGACGA	0.00190114
AGAATAGGTCC	0.00190114
GTCCAGGAAAA	0.00190114
AATTAAGAATC	0.00190114
GCAAACTACAA	0.00190114
GGAACTTGCGA	0.00190114
CAGGGTAGGAG	0.00190114
TCACGAACAAA	0.00190114
CCCCAAGGGGC	0.00190114
AGCATCGTTAT	0.00190114
ATAGGAGGACA	0.00190114
ATACAGATTCG	0.00190114
AGAGACACAAC	0.00190114
GTGGTGGATTA	0.00190114
ATAAGTACCGC	0.00190114
GCGGATTTTAC	0.00190114
AACGTACAAGG	0.00190114
GGATTAGAAAA	0.00190114
AATCGAGTGTC	0.00190114
CTACTGCTATA	0.00190114
AATATGTCCGC	0.00190114
AGATTCCGGCA	0.00190114
CTCCGAGCGTA	0.00190114
GATCAAATCTA	0.00190114
GAGTTGTCGTA	0.00190114
AAGCAGAATAG	0.00190114
ATAGACGTTAA	0.00190114
CCGTAGTGTCG	0.00190114
TCGAAGTCTCA	0.00190114
AATTCGCTCCC	0.00190114
CAGCTTAGTCA	0.00190114
ACCAACCGGTA	0.00190114
GATTGGTTAAC	0.00190114
AAGATATAACG	0.00190114
ACGGCCTTGAT	0.00190114
GCATATCGTAA	0.00190114
GCTTTTTGCGA	0.00190114
ACCTCCAACGT	0.00190114
ATGGGATGATG	0.00190114
AATGACTGGTA	0.00190114
AATCACGAAGA	0.00190114
CATACGTTTCA	0.00190114
AAGGCGAACTT	0.00190114
CTCTTTGCAAC	0.00190114
ACAAAGCGCAT	0.00190114
GCGCTATTAGA	0.00190114
CATGGCGTTTA	0.00190114
AAGCCTCCGAG	0.00190114
AGACTTTTTTC	0.00190114
TATCATGGTCA	0.00190114
ACAGGATTCCC	0.00190114
TCTTTATCACA	0.00190114
ATCTGATAGAA	0.00190114
AAGGGAAATGT	0.00190114
CATGGCGATAA	0.00190114
TGGCCCTCGAA	0.00190114
TTCACCGCAAA	0.00190114
GTCGGCTCAAA	0.00190114
ATCGTGCCAAA	0.00190114
GAACCAGACTA	0.00190114
ATTCGTCACCA	0.00190114
CTCGTTTTGTC	0.00190114
AAATGGTCACA	0.00190114
AATCCCTCGGG	0.00190114
CGGAGGCGTGA	0.00190114
AGAAAAAACAT	0.00190114
CAAAGAAGAGG	0.00190114
CAGGGCGTACA	0.00190114
ATTGAGCTTCC	0.00190114
ACATTATACCA	0.00190114
CAGTGTGAATA	0.00190114
ACTTTTGCTCT	0.00190114
AGCGCGCTCCT	0.00190114
CTCGTCAGGAC	0.00190114
AAGGTTGGCCC	0.00190114
CGCTTTTCACC	0.00190114
ATAGGGATCGG	0.00190114
GGATGGGTCCA	0.00190114
CGAGATGAGTC	0.00190114
CTACTACCAGC	0.00190114
ACAGCGGCTTG	0.00190114
CTGTTTTGGAC	0.00190114
GATGCATCTCA	0.00190114
ACGCCACAAGC	0.00190114
AGGAGTTTTAC	0.00190114
AGAAGCGATTC	0.00190114
ACTGTCTCATG	0.00190114
TATGAACAAGA	0.00190114
GAGGCGCTGCC	0.00190114
ATAATACCTTG	0.00190114
AGAGGCTCCTC	0.00190114
AATGCGGCTCT	0.00190114
AGATCCAAACG	0.00190114
ACAACGCGTAA	0.00190114
GGCTCAGAAAC	0.00190114
AATCGACAATA	0.00190114
CGTAGAAAGAC	0.00190114
CCAGATTAAGA	0.00190114
ACCTAAGATGA	0.00190114
ATGTACTAATG	0.00190114
AAGAGTAAATG	0.00190114
ATAATTAAGAC	0.00190114
CTCACAAATCA	0.00190114
GGTAAGTAACA	0.00190114
ATATACGCCCC	0.00190114
TATCCGAAATA	0.00190114
GCCCATGATTA	0.00190114
AACAGATTACC	0.00190114
ACAGAAGACCC	0.00190114
CGGAGGCACTA	0.00190114
ACTGGTCCACC	0.00190114
ATATCGGGCAA	0.00190114
AATCACATCGT	0.00190114
CTTTGTATTAC	0.00190114
CATCCATATAG	0.00190114
CACTTTCAACG	0.00190114
ATGGTACAGCA	0.00190114
AGACAAAAACG	0.00190114
CTCCAAACACC	0.00190114
GAGGCTACTGC	0.00190114
AAATGGCGGGT	0.00190114
GTTCCTTTTAA	0.00190114
ACTGCTAATCG	0.00190114
AACCATGACTT	0.00190114
GGATCCAGGAC	0.00190114
CACATGCTAGG	0.00190114
CTAGAAGGTTA	0.00190114
CAAAATCAGAC	0.00190114
CTGAGTCTTAC	0.00190114
CACTCATCAAA	0.00190114
ACGCACATTTG	0.00190114
CACTTTCCTCC	0.00190114
GTTTTGCGCTA	0.00190114
CGATCTATACG	0.00190114
ATGGGTTCGGC	0.00190114
AGCGGGGGGCA	0.00190114
CTGCAGGGGTC	0.00190114
CAACCGAATAC	0.00190114
ACAGAGGCTCC	0.00190114
CAAAGACAATG	0.00190114
ATCCCACTTAG	0.00190114
CTAACTAATGC	0.00190114
CACAGTGCCAA	0.00190114
AGACAAAACGC	0.00190114
CCATTGGAAGG	0.00190114
AAACTAAAACT	0.00190114
AAATTGGCACC	0.00190114
GCATGAAACTA	0.00190114
AATGTGTACTC	0.00190114
AGAGGTTTACC	0.00190114
GTCACTGAGCA	0.00190114

## Sheet: Meropenem
Feature	Importance
ACGAATCTACG	0.00256972
ATCAGGGTGAA	0.00240262
AAATCCAGTGA	0.00200641
AGGGCACTATG	0.00190237
ACCTGCCTCCT	0.00187594
CATACCTCTCG	0.00171527
CCGAATTCTAA	0.00171527
CCTAGACCGCG	0.00171527
CCGTGTATGCA	0.00171527
CGAGACCAGAG	0.00171527
ACAGGAGGGGT	0.00171527
AGACCCTTGGG	0.00171527
CGACTCTGCGA	0.00171527
CCTGGAACGTA	0.00171527
CTAAGCGTGCC	0.00171527
GCCTCTATCCC	0.00171527
CTCTCTAGTCA	0.00171527
GGCCGACACAA	0.00171527
ATAGACTCTCC	0.00171527
ATTCTAGCACG	0.00171527
AGTCTTGTCTC	0.00171527
TAGGGACGACA	0.00171527
CTACAGGGTAC	0.00171527
CCCTCGGGCGC	0.00171527
AGTTAGTCTTC	0.00171527
TAAGAGCCCCA	0.00171527
ATTCCCGTCCA	0.00171527
GGGATACTATA	0.00171527
GTCCTCGGAAA	0.00171527
ATAAGGGCGGG	0.00171527
AGAGCCGCTTG	0.00171527
CATGCTCCGAG	0.00171527
CCGTACGAGAA	0.00171527
CTAGGGGAAGC	0.00171527
GCTATACCCGA	0.00171527
ACGACTCTAAC	0.00171527
AGGATAACAAG	0.00171527
ATGGTAACCGA	0.00171527
GAGGTCCTATA	0.00171527
ACTAGAGGCCG	0.00171527
AGGGCACGAAT	0.00171527
CCTTATGGTCC	0.00171527
CAGAGGCTGTC	0.00171527
CTCAGTCCCAC	0.00171527
GATGCTAGCCC	0.00171527
AAAGCATACAT	0.00160684
CTACTGGATAA	0.00159865
CCAGTATAGTA	0.00159865
GTTACAATAAA	0.00158919
CATTGGAGGGG	0.00158402
AGTGCGTGTGG	0.00158402
CTGACGGTAAC	0.0015783
ATGTCTTGTCG	0.00157815
AGGTAAGCACA	0.00157815
GGGCCAGGTAC	0.00157815
GTAGATCTAAC	0.00157815
ATCACTCTCCG	0.00157093
TCTCCGATCAA	0.00157093
GAGGAAAAGAC	0.00156511
AAAAGTCGAGC	0.00156511
GGTAAGCATTA	0.00156511
AATCCCGCGTG	0.00154946
ATTCCAGTCCA	0.00154946
CGCTAATGACC	0.00154946
AAGGGTAGATA	0.00154612
GAGGCTACTCC	0.00153602
ACGCGGTAAGA	0.00153033
ACTCGTCCTCC	0.00152472
AACGGATCTAT	0.00151202
TAGATTAACGA	0.00151202
CTAATGACGTA	0.00150823
GTTGACACGAA	0.00150642
ATGTAGCTCTC	0.00150642
AGTAGTGCTGA	0.00150642
ATGATGATCCG	0.00150642
AAGCGCCAGAT	0.00150642
ACTGCCCTACA	0.00150642
AATGATATTAC	0.00150642
AATCGCCAGCG	0.00150642
ATGAAACTAGC	0.00149795
ACGACCCAGTG	0.00149762
ATTAGTCTAAC	0.00149762
GTGGATCTTAA	0.00149052
GAAAAACGGAA	0.00147567
GATGAATACAC	0.00147567
ACCGGACGCAG	0.00147567
AAGAGCTAAGA	0.00147567
CGCGTCAAAAA	0.00147567
AGTCGTGTTTA	0.00147567
CCCAAGGACTA	0.00147567
CAATAACGTAC	0.00147446
TCTATCCGTAA	0.0014743
CTTTCCATATC	0.00144002
CAGCCAGTGAG	0.00144002
CTTTACTGAGC	0.00143468
CCCACATTGGA	0.00143468
GGCCACCGACA	0.00143468
AGACTGCATCC	0.00143468
GCCTTAATTGA	0.00143468
CGGTAAGACGC	0.00143468
CTATGTTGCCC	0.00143468
ATAGCGTATCA	0.00143468
CGAATGTGCGC	0.00143468
ATCGGGGGGTC	0.00143468
ATGTTTTAAGG	0.00143046
TCTCGCAGCCA	0.00142838
AACCCCAACAT	0.00142838
GTACCTCTAGA	0.00142442
CTACTAGTGAA	0.00141878
ATGGGACAACG	0.00141878
AACTTAGTGAC	0.00141383
CAACGTGCGGC	0.00141383
ACCTTCGAGGA	0.00141383
AAGGATTCAGC	0.00141383
AGCGCTTTGCA	0.00140935
CGATATCATTC	0.00140328
ACTACACGTCA	0.00139277
ATTGCTATCCA	0.00138757
CACAAATGTCA	0.00138757
CATGATAATGA	0.00138757
GCCCATACTAC	0.00138344
ACCACAGGCGA	0.00138344
CCATCGTGGTC	0.00138241
ACTATAGAAAC	0.00138241
GAGTGATGAAC	0.00138241
CCTCGTTATTC	0.00138241
AGAAGGTGTGG	0.00137729
CGAGCAGAACG	0.00137729
GCCCTCGTGAC	0.00137729
GACGGCGACTC	0.00137729
CCCCATCTAGG	0.00137729
ATGCGGTCTAC	0.00136761
GTAGTATTATA	0.00136761
CAAACCTAGGA	0.00136707
CCTCCATGGGA	0.00136707
CAATTACCCCG	0.0013628
GCTGTGTTGTA	0.0013628
ATCAGCCACTC	0.0013628
ACCACTACTTG	0.00134401
GATCGCCTAGC	0.00134401
ACAGGTCGATA	0.00133421
AGCATCGGCGA	0.00133421
CCCAACCCTTC	0.00133421
GGATACCGAAA	0.00133421
CGTTTCTGCAA	0.00133312
GATGTGGAACC	0.00133143
ACCGAGGTGCT	0.00133143
CCGTTGTTGAG	0.00133132
GTAACGTCTGA	0.00130085
GCATTCTACAA	0.00129601
CACAAGAAGAG	0.00129601
CTTATCGTGCA	0.00129601
GCTAACTTGGA	0.00129601
CGGTTGGGATA	0.00129121
CCAGGTCCTGA	0.00129121
TGTCCCTTGAA	0.00129121
CCAGCACGAGA	0.00129121
ACACAAACCCA	0.00129121
GAGGTTTCGCC	0.00129121
CCGGTTTCTGC	0.00129121
CAAATCCTGGC	0.00128764
TATCCCTTGCA	0.00128165
TAGACGCATCA	0.00128165
ACTCGGGAAGT	0.00128165
ATCCTCGTTAA	0.00128165
ATCTGCTAGGA	0.00128165
ATTCACTGAGG	0.00128165
AACATAAACCC	0.00128165
CCTAGAACGAC	0.00128165
AGCTATCGTGA	0.00128165
ATATTTACTGC	0.00128165
ACGCGGTCTAG	0.00127843
CACATGACCCC	0.00127671
CCTAAAGGAGG	0.00127671
ATACTTGACAG	0.00127052
AGCGGTACGCA	0.00126143
GGCGGCCCAAC	0.00125293
CGGAATTATAA	0.00124597
TGAGTACATAA	0.00124328
ACGTATACTAG	0.00123957
AGTCGGTTGGC	0.0012343
GACGACACAGA	0.0012343
ACAGAGTTGTC	0.0012343
GCCACCCAAAC	0.0012343
AGCCCTAGCAG	0.00123353
GCGCTGTCTGA	0.00123353
ACTGTACGCAG	0.00123353
GCGGGACCTCA	0.00122787
AATTTGCAGTC	0.00121598
GACCGGTTTGA	0.00121413
AACAAGAACGC	0.00121204
GATTAGGCGAC	0.00120134
CTTTGAACCTA	0.00118065
AATGTGTAAGG	0.00118039
GAGGTGATGAA	0.00116501
TGAGGTGGGCA	0.00116501
ATCATCCCTTG	0.00116064
AGAAGAGTAAT	0.00115631
CTTGCGGGAGC	0.00115201
CAAGCAGCGTG	0.00115201
ACTTTTGGACG	0.00115201
ACACTTCAAGC	0.00115201
ACTCCTCTTTG	0.00114775
ACTAAAGAGAA	0.00114775
AGGTTGCAATG	0.00114775
AGCGCAGTCAA	0.00114775
GAGACGGTGTA	0.00114775
CGAAAACGAGA	0.00114775
GAGAACATCTA	0.00114775
CCATGCAGCCA	0.00114251
CCTCAGGTCCC	0.0011406
ACCCTACTACT	0.00113926
AGCTAGGGTGC	0.00113926
ATGCGTCTAAC	0.00113926
GTGGAGCCTCA	0.00113926
GGCTACTATAC	0.00113926
GAGACGAAAGC	0.00113926
AGAACGTTCGA	0.00113926
AGTATCCCCCG	0.00113926
GTTAGTATGTA	0.00113926
CCCCCCGGGTC	0.00113926
AGGCGAGGTAT	0.00113926
CGACTAGACAG	0.00113926
AGACTGTCTGC	0.00113926
CAGCGGTCCAC	0.00113926
GCAACATCCTA	0.00113926
GTTAGTGTGGA	0.00113926
CAGAACCAAAC	0.00113926
GTTTCCTAATA	0.00113926
ACACTTTCGTA	0.00113926
AAACTATCCTC	0.00113926
ACGCTTCCCTA	0.00113926
GATAAGATTCC	0.00113926
CCCAGAGGTGA	0.00113924
CCCAACTTAGA	0.00113713
CGTGCGACCGA	0.00113495
CCTAAGAGGCG	0.00113495
ACGTAGTCTGC	0.00113495
ATGAAGCTAAC	0.00113349
CGTGTTAGATA	0.00113077
ATACTAGCGAG	0.00112954
CCCCCTTCAGA	0.00112864
CTCTACTCATA	0.00111372
CTCGCCACAGC	0.00110986
CGATATAATTA	0.00110789
AATCTAGTTAA	0.00110729
AAGCGTCGATC	0.00110314
CAAGACGAGAA	0.00109631
AACAGCTAGCT	0.00109631
ATGCATCTCTA	0.00108404
GTGGTTACTGA	0.00108404
AGTAGAGTTAG	0.00107922
ACACCCAGAGG	0.00107358
GAGCCACACGA	0.00107066
CATGACCGTGG	0.00106594
TCCTTCTGAGA	0.00106594
AAGGCAATTCA	0.00106433
CTCAGCCCTAA	0.00106116
TCTCCCCCACA	0.00105995
ATGCTATACGA	0.00105576
ACATTAACATG	0.00105576
ATGTCGAAAAA	0.00105488
CATGGCCAATA	0.00105119
AGCATCACCGA	0.0010485
AGAACTAGCAT	0.00104458
TAAATTCTATA	0.00103681
CTTCCCTACCA	0.00103681
CACACGATGAC	0.00103681
CTACGTCAACC	0.00103681
GGCATGAGAAC	0.00103459
ATTAACATACG	0.00103387
GCCCTGCCGCC	0.00102783
AGCGAGGCATA	0.00102592
AAGCACAGGGG	0.00102592
AGGTTAGTTGC	0.0010252
CCGTGTAATAC	0.00102148
ACTTGAGAGTC	0.00102148
ATCGCAACGCA	0.00102148
AAGAGGAGCTT	0.00102148
CACATAACCGG	0.00102148
CATCAAGACTC	0.00102027
ACTCTATGGAT	0.00102027
GGTGAGAAGAA	0.00101909
CTCTTGCACAC	0.00101177
AGAATCGCTAT	0.00101177
CGATTTGGCCC	0.00100662
GTCCCCCGCCA	0.00100638
CGCCAACAGTC	0.00100214
CTGCCATCCAA	0.00099492
CGTATTCCACG	0.000991124
CATCAATCGAC	0.000991124
AATGAGAGATC	0.000991124
CTATTGCGATA	0.000989494
ATCTAGTTACG	0.000977184
ACCTAGATCCG	0.000969139
GACTCTATCGA	0.000969139
CCGCGTACCAA	0.000963593
AGGCAAACTCC	0.000963593
GGCAGTCTACC	0.000955225
AGCGTCCCTCG	0.000955225
AGAAGGGTACC	0.000951626
GGTGATGCTAC	0.000949616
ATTGCTCTAGA	0.000946233
AGAGCGCGAAT	0.000946073
ATTACTCGATC	0.000946073
CAATTGTGCTC	0.000939698
AACTGCCGACA	0.000932004
ACACCCATAGC	0.000925049
GCTGGCGTACC	0.000925049
CGGACGAGAAA	0.000925049
ACTCTAAGGCA	0.000925049
AGACTCAGGAA	0.000914005
GTAGTTTCACA	0.000911743
GACTAAATGGC	0.000909534
CAGTCTCTAGG	0.000905527
AGTTCATTCGG	0.000899353
CACCGGGGTTC	0.000899353
GCCTGTCTTAC	0.000899353
GTCACATTATA	0.000899353
CAGCGTATGGA	0.000899353
TCCTTGTATCA	0.000899353
GACAATATCTC	0.000899353
CAGCGGTACGG	0.000899353
TCCTGGGCGAA	0.000873754
ACTAATGCTTG	0.000872906
GTGTAGTAAGA	0.000870481
ATGATTATCCA	0.000870481
GCCGTACTTCC	0.000870481
AAGTGGGACTA	0.000870481
AACGCGGACCA	0.000870481
CCATCTAGTCG	0.000867233
ATGCATAGTCC	0.000867233
ACCGATAGTAA	0.000867233
CGCAATGACAC	0.000867233
GCCGAGTTCGC	0.000864009
CATGCAGTGCG	0.000864009
CACGACTATGC	0.000860809
CATCTACGATA	0.000860809
CAGTCAAGAGA	0.000860809
CACTTGCCAAA	0.000860809
AATTTACCCTA	0.000860809
CCAAAGTCGCG	0.000860809
GTAGCAGAGTA	0.000860809
CACTGGAAGAG	0.000860809
CGTGTGAGAGA	0.000860809
TCGCATGCGAA	0.000860809
CCCGCTGGTCG	0.000860809
CATATCTTGTC	0.000860809
GCCGCCTAGAA	0.000860809
ATGCTCTCAGG	0.000860809
CTATTCTACTA	0.00085636
CTGGGGGCTAC	0.000854457
GTATCTAACGA	0.000854457
TAGGATGGAAA	0.000854457
CTGAACCTGAC	0.000854457
CTATACTAGGC	0.000854457
GTCCACGACCA	0.000854457
ATCCTAAGTGC	0.000854457
CGTTCATAATC	0.000854457
CACGGACTAAC	0.000854457
ATTCGACTCCG	0.000854457
AGACTCTACGC	0.000854457
GTAACTCGGAC	0.000854457
CCATAGGCAGG	0.000854457
CACTAGTTGCC	0.000854457
ATAGGACTCCA	0.000854457
AGGTGATTCTA	0.000854457
ACTTATGCGCG	0.000854457
AAAACACACGC	0.000854457
TAGACTCCCTA	0.000854457
AGACATCTGAC	0.000854457
CTAGATAGATC	0.000854457
ACTATAGCAGT	0.000854457
CGCCTCATAAC	0.000854457
CCTAGAGTCAG	0.000854457
CACACAGGCTA	0.000854457
CAGCCCTAGCA	0.000854457
AGCGGACTTAT	0.000854457
GGTATGTCCCA	0.000854457
ACCCTAGCCAC	0.000854457
CCTAATATCCG	0.000854457
ATGTTACGGTC	0.000854457
CTAGGTAATAC	0.000854457
CGTTTGACATA	0.000854457
CACGTTGGTCC	0.000854457
CATGTGACACG	0.000854457
CCTTGACTCTC	0.000854457
ACTCTAGGGCT	0.000854457
ACGAGGGACAC	0.000854457
GTGGTAGGGAA	0.000854457
CATCCTACAGC	0.000854457
CCATAAGGGAC	0.000854457
GACTAGAGAGC	0.000854457
AGGGGGCCCTA	0.000854457
AAACTATCATT	0.000854457
CGACGGGTAAG	0.000854457
ACTCCCTAACT	0.000854457
CCGTGGCTCTA	0.000854457
CTAGCTTGGAG	0.000854457
AAGTTAGGGGG	0.000854412
GGACCAGTGTA	0.000851256
CCCGTCAAGAG	0.000851256
CTACCAGTAAG	0.000851256
GAACCTACGAA	0.000851256
GCTTGCAAGCA	0.000851256
ACACTGTACGC	0.000851256
CCTACTTCTAG	0.000851256
AAGACAGATGG	0.000851256
AGTCCACTATA	0.000851256
AGCTAGCTACT	0.000851256
GGCGGTGCCAA	0.000851256
ACCCTACTAGT	0.000851256
CAGGAGATAGG	0.000851256
AGGAGAGTGTC	0.000851256
CCGCATCACTA	0.000851256
AGAGCTGAGGG	0.000851256
CAGAGATGTGA	0.000851256
GTACACGGATA	0.000851256
TCTAGGGGGCA	0.000851256
CCTCAGTCTTC	0.000851256
TAGTTCTGGCA	0.000851256
ACGTGTTTAAC	0.000851256
GTCCCGTATCA	0.000851256
ACAGCTAGCTA	0.000851256
CAGCTAGCTAC	0.000851256
CTGAAGAGATA	0.000848033
ACCTTGCGAGG	0.000848033
GGGAGTATGAA	0.000848033
CAGACACGGAC	0.000848033
CCCTATCGAAG	0.000844784
ACAAGGGGGAC	0.000844784
ATTCACGATGC	0.000840658
ATCCTGGTCGA	0.000825937
ACAGCTACGCC	0.000825937
GCGCTCAAACC	0.000825937
AAGCACGATGT	0.000825937
GCTACTTGAAA	0.000825937
GACATGAACTC	0.000825937
ATTTGCGAAAG	0.000823825
CTCGATTTGTA	0.000816076
ACAGAGAGCAT	0.000816076
AATTGCTCGAC	0.000810009
GGGTGTCTGCA	0.000806409
CCAATATACTA	0.000806409
CTGGGGTCGTA	0.000806409
AGATTACAGTC	0.000802294
CGAGGCAACTC	0.000802294
ATTCAGACCGG	0.000802294
GCACCAGTCTA	0.000802294
CGTTATCCCGC	0.000797941
ATAGACGGTCC	0.000797941
GGCGGCAAAGA	0.000797547
CAAACATCGGC	0.000796413
AAGCTATCCGA	0.000794322
GTCGCAATCAC	0.000794322
AGCCCGGAGCC	0.000792009
AGAATTCCCTA	0.000792009
AAGTCATTGTA	0.000787578
CCCACCTGATA	0.000786378
TCACGCATGAA	0.000785463
AACAACGACCG	0.000785463
AACATGTCAAA	0.000785463
ACCCCTAAGTA	0.000784026
GGGCGAGCCCA	0.000778852
AACTGGATTCA	0.000777608
ACGAGCACTTA	0.000777608
CAAACACACGG	0.000777608
CGCTTATACTA	0.000774364
GGTTTCGCAAA	0.000770874
CGTCTTTAGAG	0.000770874
GCGAACATGAC	0.000770874
AGTGACTTGAC	0.000770874
TAGCGAGGCGA	0.000770874
GGAGTGATGAC	0.000770874
CGCGCGTGAAG	0.000770874
CAGAAGGCGGC	0.000769572
ACATCGATACC	0.000768008
CACCGTAATTA	0.000768008
CATTCTAGATA	0.000768008
CCACAGCACGC	0.000768008
CTCTAGCGTCA	0.000768008
GCTGGGCGGTA	0.000768008
GCTAGTAGTCA	0.000768008
AGGATTAATGA	0.000767943
TAGTCATTGAA	0.000761671
AGCAAAGGACC	0.000761671
ATTATGACTCG	0.000761671
AAAGAGCACTT	0.000759373
CCAAGAGACAC	0.000759373
CTTCCCGGCTC	0.000759373
ATAACGAGGGA	0.000759373
CCCTACTTAGC	0.000759373
CGGGCATATTA	0.000756008
ACCGAGCCTTA	0.000756008
AGCGCTGGAAT	0.000756008
CCTGCGGTCCA	0.000756008
TGGAATTCACA	0.000756008
GAATGGATTAC	0.000756008
GTGTGACACCA	0.000756008
CAGTTCACTCG	0.000756008

## Sheet: Colistin
Feature	Importance
ATCAAGTGTTA	0.00158975
CGGGTCTCCTC	0.00144494
TGACAGCCACA	0.0013517
ACTCACTTCAG	0.00117197
AGCCCTTTGTC	0.00115218
TCAACACGAGA	0.00112354
CGGTCCATCCC	0.00110698
TATGACACCAA	0.00110678
GAGTAATTAAC	0.00109421
CTAATGGTTAC	0.000987763
AAGTAAGCCAG	0.000984906
ATGCTAAATGG	0.000977866
AGACTCTTATC	0.00094168
CGGGTGTGCCC	0.00094168
ACAACTTACAA	0.000924603
AACCGTGCCAA	0.000918585
AGGCTGGGAAC	0.000912002
CCTCATCCGGC	0.000891938
ATCTCGAGAGC	0.000891938
CTAAACCCGAC	0.00087704
CGGCTATGAAA	0.00087704
CTACAACGTAG	0.00087704
CGGTATTCGGA	0.00087555
CCAGTAATGCG	0.000863037
CATTCCTCCAA	0.000851054
TTAGACCCCAA	0.000841876
ATAACACAGTA	0.00082799
AGCACTCTCCT	0.000826703
CGAAGCTCGAA	0.000826703
ATGCGGGGTGC	0.000824005
ATGACAGCCAC	0.000824005
CGCCCGGTCCC	0.000824005
CCTGGAGTAAC	0.000820849
AGCATAAACCT	0.000817669
GCGATCACAGA	0.000814465
AATAGAATCAC	0.000814465
ATACTAATACA	0.000812899
ATCCCCCTTAC	0.000811237
ATACCGTCGGA	0.000798703
ATTTGGATACA	0.000790776
GTCTGGGGATA	0.000784775
GAGAGCCTAGA	0.000781311
CGACATGTAGA	0.000775344
TATCGTACGCA	0.000771219
CCTTTTACTCC	0.000767808
CATCCTAAGTC	0.000765212
AAGATTGCTGT	0.000763439
ATTCAACGGAG	0.000760761
CTTCTGTACGA	0.000759277
AGGCAGGACGG	0.000759277
GCAGGGGGGGC	0.000759277
ACCTTTGGTGG	0.000757512
ACTATTTACAT	0.00075663
CTCACACCGTC	0.000754209
GACATCGCACA	0.000754209
CACACCGCAAA	0.000752424
CAATGACTACC	0.000748911
GAGAATCCTCA	0.000743388
ACAAAGGAAAT	0.000740488
CAGAGACGGCC	0.000740488
CATATCAGATA	0.000740488
AGGGCGTTAGG	0.000740488
GATCTATCTAA	0.000740488
ATTAGTGGTTA	0.000740488
ACACTGTGGTG	0.000740488
CCTGACAGAGC	0.000736985
CACAATGTGTA	0.000729933
CGAGGGACTAA	0.0007239
CCGCTCGTTTA	0.000722335
CGCTACAGGCC	0.000715118
CTATCCAGACC	0.000713288
CTCGTGTGGAC	0.000711503
ACACACCAGAT	0.000709685
GCCGACGTCCC	0.000709685
CAGGTCAGCAA	0.000709082
ATGCCCAGGGA	0.000705644
TCTGTATGGCA	0.000704159
CCGTGTCCCGA	0.000703625
CCTCCTGTAAG	0.000703625
ACTAACCTTCA	0.000701485
ACAACCATGAC	0.000701485
GACGTAAAACC	0.000693796
CACAGGTAACC	0.000693551
CATGTGGAAAA	0.000692722
AGGGCTTATAC	0.000692722
ATATCCAAGCC	0.000692722
CTGAATTCCCC	0.000692722
ACCATTCCCCA	0.000692722
AGAGGATGTAG	0.000692563
ACTGATTGAAC	0.000689977
CCCGGATCTCC	0.000689977
AGTCGAGCAGA	0.000687896
AGATTTGTCAA	0.000682145
CTGTCTTGTGC	0.000681916
CGGTCAGATAG	0.000677204
GGACAAGTCTA	0.000676654
GATCGGATGAC	0.00067617
CCGAGGCCTGC	0.00067617
AACTTCTCGTC	0.00067617
ACCAACACTAC	0.00067617
GAGCACAACCC	0.00067617
GAACCATTGTC	0.00067617
ATGAGCTGGTA	0.00067352
ATAACGCCATC	0.000673325
CTGTGCGTGAC	0.00066895
ACATAACTTCT	0.000667701
AAGTTTGGGCC	0.000666568
TGACTTTGGAA	0.000664619
GAATTATACCA	0.000664619
CACTGGCTTGG	0.000663287
CATAACTGGCA	0.000663054
ATGTAACATGG	0.000661771
AGGCGAACGAC	0.000661385
AGCTGTGACTG	0.000660781
ACAGATTACTA	0.000660279
GGATTACAGGA	0.000660279
AGTTCCTGTGA	0.000659232
GAAGTCTCGAC	0.000659232
ATAAGGCGGGG	0.000659232
GCGTGTTAAAA	0.00065772
CACCAGGCCGC	0.000656639
GACTATTTATA	0.00065649
CGGGCGTTGAA	0.000655163
ACTTCTTAATA	0.000655163
TATATATCGCA	0.000652914
AACCAGAGGTG	0.000651756
GGTAACGTCGA	0.000651685
ACGAGAAGCAA	0.000651685
CGGCGTAACCA	0.000651685
TACGCAAGGAA	0.000651685
GCTGTATTGCA	0.000651685
AGCTTTTCTAC	0.000651685
CCTTATTATGA	0.000649161
ACCGACTGAGG	0.000649161
AGACGGCGGAG	0.000649161
ACTCCGACTCG	0.000649161
AACACTTTAGG	0.00064901
GCACTCTCCGA	0.000647286
CCGCCCACTAC	0.000645884
TATAGTACATA	0.000644025
AATGAGTCACC	0.000644025
AATTCACGGCA	0.000644025
AACCAATGGCC	0.000644025
GCAGAGAATAC	0.000638452
TATTGGTACGA	0.000638452
ACTTCATTAGC	0.000638452
CAAAGATGACA	0.000633579
CCGAGGTTCTC	0.000633579
GGAGCAAGTAC	0.00063196
ATCGTAAGAGA	0.000631067
TAGTCATAACA	0.000631067
ATTCTGTTTAG	0.000631005
ATCGAATTCAT	0.000626913
CGCTACCCGAC	0.000621747
GCCACAAAACC	0.000621747
CACACGAACCG	0.000621747
CACAATGGATA	0.000621747
AACCTCACGGT	0.000621747
ACCCGGTGCCC	0.000621747
AAGATTCAGCA	0.000621747
ACCCAAAGCTC	0.000621142
CGTGCAAGCTA	0.000617699
AAGTACATAAC	0.000616142
ACATGACAGGA	0.00061334
AACTGACAATT	0.00061334
AAGATACATTG	0.00061334
GGTACGGAAAA	0.00061099
GGCGGAGGCAC	0.000608964
GCGAGGACAAC	0.000608964
ATAACCACTCG	0.000608964
CATTCCTTCGA	0.000608964
CTCATTACTGA	0.000607573
ATCCCCGAAAT	0.000607573
ACGGGAGGCTG	0.000605255
ATACAATTATA	0.000603537
CCAGTGGAGTC	0.000603178
GAAGATCGATA	0.000598511
ATACTAGCTGG	0.000596491
AATCTGAACAC	0.000595431
CCACTCGTGGA	0.000594867
ATGACAGCACC	0.000594454
ATGTTCTTCCC	0.000594175
ATGATCAGGTA	0.000593798
GTGACTGAGAA	0.000593552
CCGACTCAACC	0.000593406
TATGTTGACGA	0.000592626
ACAGAAGCGAC	0.00059222
ATCTCCGAACA	0.000592036
TATACTTTCGA	0.000590359
CGATTCGCTCA	0.000590171
AAGCGCACCAT	0.000590171
CGAATCGCTAC	0.000590171
AAGAATTCGAT	0.000590171
CACGTCATTAG	0.000590171
TAGCCCATTCA	0.000590171
ATGGTTCGATG	0.000590171
ACATGTGAGGA	0.000590171
GTTCGCGAGAA	0.000590171
AACATATATCT	0.000590171
CCAAGGCGCCG	0.000590171
GCGCCCTTTAC	0.000590171
GGGGGATACAA	0.000590171
ACACACAATAA	0.000588948
AGATCCGTCAT	0.000588859
CCCTGTCGACC	0.000587629
CTATCTCCTTC	0.000587381
CGTCATAGTTA	0.000585465
ATATCTTCGTG	0.000585238
AGATTACAGTA	0.000585238
CAGCACAAGAC	0.000585238
CTTTAATCCAA	0.000585238
CGGTCCGCCTA	0.000584651
ACTTCTGTTCG	0.000582731
ACTCATTTGAT	0.00058249
TGCACAATGCA	0.000581907
GCTGCATCAGA	0.000575098
AGTCCCAGCGA	0.000575098
TATTGTGCCGA	0.000575098
AAGGGCTCATT	0.000575098
GAACTTAGTCC	0.000575098
TGGTTCAGACA	0.000575098
ACTTCGCCCCG	0.000575098
AAGTCGGCCGA	0.000573699
ACAAGCATAAT	0.000573699
CCATTATCACG	0.000573699
CACCCGTGAGG	0.000573699
ACGGACAAATG	0.000573699
AGATATACGTG	0.000573699
ACCCAACCACT	0.00057146
GCTAATTTCAC	0.00057146
ATATAGCCAGC	0.000570575
ACCCACTTTCG	0.00056974
AGCCCGTGTAG	0.000568904
CAGACCCTGCA	0.000568862
TCGAGCTTGCA	0.000567343
CTTCATCTCAA	0.000567343
CCCTCTCGGAG	0.000566763
AGGATTGAGAA	0.000566763
AATTGAGGTAA	0.000566417
CACGTGAGCGC	0.000565865
CCCCTGCTATA	0.000564199
AATCACCAATG	0.000563818
ACCAGGCAGAA	0.000563818
CATAATTATTA	0.000563818
GTCACTGTTTA	0.000563818
AAGCATGCGTG	0.000563818
AGGAATTTATA	0.000563818
GTGTTTAAATA	0.00055955
ACAGTCGGTGG	0.000557384
TAGAGGAGTAA	0.000556967
TGACCCAGGAA	0.00055646
GCATCCATCGC	0.000555494
AATTTGGAGCT	0.000555343
TCCAACATCAA	0.000555167
CGAAGTAGATC	0.000554503
CATATTCCCAG	0.000553879
CTCCACCTTTC	0.000552984
GCGGTTACCCC	0.000547294
GATTATCGTAA	0.000547294
TACCCGAAATA	0.000547103
CGTTATGATAA	0.000547103
CATCGCGTTTA	0.000543343
ATTTTACTTTG	0.000543118
AATCACTATCC	0.000543118
GCATTCGACTA	0.000543118
AAAGCTGCCTG	0.000543118
CAAAAGGGCGC	0.000543118
GCCAGTCTACA	0.000543118
CACGGGATAAG	0.000543118
CAATCGGTTGC	0.000543118
AGGAAACACGG	0.000543118
ACCATCCATCA	0.00053891
AATCTAGCATT	0.00053891
AACTACCAGAA	0.00053891
AGGGACGACGC	0.00053891
AGTTGTAGCGC	0.00053891
GAGTATACATC	0.000535641
AACCTAAGGGT	0.000535404
AAACGTAACCC	0.00053482
ACGTCCCCTAT	0.00053467
ACGTTGAGGAC	0.00053467
CTCTGGTTGCA	0.000534538
GCACTACGAAA	0.000534532
CCTCAATCTCG	0.000534532
ACCCAACATGG	0.000532364
AATGTTAAACT	0.000530398
ATCTACCTTGG	0.000530362
CCCTGGACCCG	0.000530213
GGAGGACCCTA	0.000529809
CACACGGCACG	0.000526094
CAACTGTTTAC	0.000524044
GTTGTCAGGCA	0.000523166
ACAAAGGATCG	0.000523005
ATGACTGATCC	0.000522788
CTATACCACCA	0.000522416
ATGCCCTTAAA	0.000522118
ATCCTGATAAA	0.000521803
CTGTTCAGATA	0.000520373
ATCAACTATAG	0.000520373
TAACAGGTTAA	0.000520373
GCTTACAAGGA	0.000519691
GTAGATCAGGA	0.000518425
ATATGGGGATA	0.000518072
ATCTGCAGGTC	0.000516369
GTTGCAACCGA	0.000515875
AAATATAGACA	0.000515042
ACGCCCGTACC	0.000515042
AAGTTAGATGC	0.000515042
ATGTATTCAGA	0.000514114
ATAATGCATTC	0.000513331
ACCCAGGTAGC	0.000513331
ATTGACTATGA	0.000513331
CTCAATTATCA	0.000513331
ATCATTAACAT	0.000513146
ATTAGAACTGC	0.000512706
ATAGCATTAAC	0.000511811
GTTTGGCGAGA	0.00051022
GTTCTACTGTA	0.000509648
AGAAAACACTG	0.000509648
CGTCGAGTAAA	0.000509648
GGGGTCGCACA	0.000509648
ATTCCATTGGG	0.000509648
ATCTATCGCTG	0.000509648
CGCTCACACAA	0.000509648
CATGTTCTACG	0.000509648
CAGAGATAGTC	0.000506685
AAAGATTGCTA	0.000506685
GTTAATGGTTA	0.000505525
CAAGGAACAAC	0.000504994
CCTCACCAAGG	0.000504804
AAGTAGTAACT	0.000504654
CCCGGTCCTGC	0.000504654
CAGACCAGATG	0.000504654
AATATTACTGT	0.000503779
CCTGAATCATA	0.000503779
AACTTGGTGCT	0.00050275
CGAGTGATAAG	0.000502131
CAGCAGACTCC	0.000500657
ACAGTTAGCTG	0.000500496
AGTAACAATTG	0.000500172
AAAAGCATCGC	0.000500172
AGTGCTCGTCA	0.000499868
CACGTGTCGTA	0.000499295
ACGATATAGGC	0.000499295
CGCACTATTTA	0.000499295
GATCAAATAGC	0.000498859
AGCCTCATGCA	0.000497869
CCTAGGCTGGA	0.000495534
AATTCACCGCA	0.000495534
AATACGACAGT	0.000495534
ACCTTCATCTG	0.000495534
CGAGACATCCG	0.000494249
ACATGGCAGAA	0.000494249
ACCGAATGATA	0.000494156
CTGCTACACCC	0.00049401
CTGCGGCGCCC	0.000492058
ACTTGTAATTA	0.000492058
CGTCAGTAGGC	0.00048694
AACGCATTGGT	0.00048694
TAAACACTAAA	0.00048694
CCCCACGTCGA	0.00048694
GGACGATTATA	0.00048694
AGGCAGTTGAT	0.00048694
ATACAAGCCAG	0.00048694
AGTAGTAATAC	0.00048694
CTCGGACTGAA	0.00048694
ACTTGATGCGG	0.00048694
CACATCCATAC	0.00048694
CAACGAGGATA	0.000486223
CATGTAACCTC	0.000485013
AATGACTCGCT	0.000484903
AACCATAGGGG	0.000484794
ATCCTTCATAG	0.000484413
CACGTAGCTGC	0.000483066
CCAAAGGCTTA	0.000478449
TGCCACAGGCA	0.000477901
GGCGAAGATAA	0.000477901
CCGACCAACAC	0.00047786
ACTGGACTGAC	0.000477046
AAAGGTACTTA	0.000476089
CTCTCTTACGA	0.000474341
AGACCTTAGAC	0.000474341
AAAATCTATGG	0.000474341
GCCTAACAAAC	0.000474168
AGTTTTCCCCC	0.000472884
ATTACAGATTG	0.000472382
ATCGAACGGCG	0.000471782
TCTGCATAGCA	0.000471609
AGACCAACGAA	0.000471609
GCAAATTCGCA	0.000471609
AGCGATCTCAT	0.000471609
ATCCGACTTCG	0.000470632
CTACCCATGCA	0.000470632
AGGAAGATCAA	0.000470632
GAGTGAAGCCC	0.000469508
CGTGCTTCTGA	0.000469508
AAATTCTGCGT	0.000469156
ATGGTCGTAAT	0.000468767
AAACGAAGCAG	0.000468767
AATGATACCTA	0.000468655
AAAAGTGAGTC	0.000468655
AAAGGGCGTTA	0.000468082
TACTCCATTGA	0.000468082
ATTACTTACGG	0.000467944
AATCCTACAAG	0.000467866
CTAGAGGCGTA	0.000467339
CCCTATTCAGA	0.000467339
ACACCCACCAG	0.000467339
ACAGGTGTGGC	0.000467339
TAAGGAGCATA	0.000467209
ACACTATACCG	0.000466895
ACACACAACTA	0.000466895
CGGAACCTGTC	0.000466874
CAACACCGCAC	0.000466624
GCGCTTGCTGA	0.00046631
ATCGTGTGAAT	0.000464424
ACTTGTGAACG	0.000464342
CTTGCTCCGCA	0.000464229
GCAGATTTCTA	0.00046394
AATACTACGGA	0.00046394
GCAAGAATCCA	0.00046394
ACGCGAGGATG	0.00046394
ACTGCATTCTC	0.00046394
CGCAAAATAAA	0.00046394
TCCGAGCGAGA	0.00046394
CGAATGCAACA	0.00046394
TAATAAGAGAA	0.00046394
ATAAAGTCTTA	0.00046394
TCAGCTAGGGA	0.0004629
TAGTTCTATCA	0.000462468
AAAGAGCTTGC	0.000461709
ATTTATCGCAA	0.000461567
CCCCAGGATAG	0.000461519
AATCATGTGGT	0.000461098
ACTGTTGGGAA	0.000460713
CTAGGGGTAGC	0.000459712
AGGTAGTATAG	0.000458918
AGGGCGGATCA	0.000458356
AACAAAGCCTG	0.000458356
ATTTACTGAGG	0.000458356
AAGTACCCCGC	0.000458356
GCAACGCATCC	0.000458356
ACCCGTATCCC	0.000458356
AAAACTTGACG	0.000458356
ATATCGGACAG	0.000458266
ATTTTCTACAG	0.000457747
AAAGGCTGGTA	0.000457564
ACTACTCGAAC	0.000455247
ACTGCTATACT	0.000454365
AGGGTTTTGGC	0.000453729
GAAAACGACTA	0.000452412
ACACCCACAGG	0.000452412
CCTCAGAACAA	0.000452412
ATGCCTTCTTA	0.000452412
GATCAAACATC	0.000452412
CTCTGTAACGC	0.000451215
CATCTGCTACC	0.000450961
GCTAGATTCCA	0.000449934
ACTTTTTCTCC	0.000449236
ATCAATAGACC	0.00044755
ACATTATGGGG	0.00044587
AAGCACACCAC	0.000445591
GGATGATATTA	0.000445591
ATGCATTGCAA	0.00044555
TAGTTATAACA	0.00044555
GCGCGAAAACA	0.00044555
GCAGTCCACGA	0.00044552
GGTGCCCGCAC	0.000444621
CCTAGTATAGG	0.000444062
CAACGATATAA	0.000443113
CCTCCACTTAA	0.00044281
GTGATAGAGTA	0.000442713
CAGTGAGTACA	0.000442004
AGACGTAGATG	0.000441882
ACCAAACTGGA	0.000440977
CAGTACCTACA	0.000440977
GAACCTCGTGC	0.000440977
CAACGGATACA	0.000440977
GACCCCCACAC	0.000440977
CTATTAAGTTA	0.000440977
ACCTTGGGCGT	0.000440977
TAAGGCAGGAA	0.000440497
GAGACAGTCAC	0.000440337
ACCTATGAACG	0.000438979
GTCGACAGGGA	0.000438152
AGACCCAGACG	0.000437332
CCATAGGGGAG	0.000436819
ACAACACCTCT	0.000435972
AGCCGCCTAAT	0.000435777
ACTCTATTTCA	0.000435679
CACTGAATACA	0.000433732
ATGTTTCTCAG	0.000433357
GTGCGGGTGGA	0.000432875
CGATTAGTTAG	0.000432852
ACATATCAGGA	0.000431876
ACCGTATCTCC	0.000430706
ATGTGTCGCTG	0.000430398
CCTCATAGTTA	0.000430398
ATGTGGGTCTG	0.000429787
CTCCCATCGGA	0.000429613

## Sheet: Tigecycline
Feature	Importance
GAGCGCCCCCC	0.00166945
CGGTATCTGAC	0.00166945
AAACCTCCGAG	0.00166945
CTAAGGTACAC	0.00166945
CCACAAGATGA	0.00166945
GGTGTACTCAA	0.00157629
ACAGGGGTGAA	0.00145723
ACGCTTTGAAT	0.00142263
AATCGAATAAC	0.00135269
CTTAAACCCTA	0.00133052
GCGCTAGTCGA	0.00129966
GTATTATCCAA	0.00129868
AATCAAGTCAG	0.00124738
ATTCTGCATGC	0.00124738
CTCTACCTCTC	0.00124274
AACATGGCGTT	0.0012427
AGGGGGGGTGA	0.00119873
GAAGACCGCAA	0.00117422
CTCGTCCGTCC	0.00116406
ATGCTATGCTC	0.00112205
CACTCTTAGCA	0.00111917
GTGCGGTAGTA	0.00111293
CGAAAGCCTTC	0.00111289
ACGCAAGACAC	0.0011088
AAAACCCCACA	0.0011088
TCCCGGTAAGA	0.0011088
CGGGGTGCGAA	0.0011088
AGGGCTCCTCC	0.0011088
CGTCCGGTCTA	0.00110457
CGGGGTGCTTA	0.00110457
ACCCGAGTGAC	0.00110457
ACGAAAGGCCC	0.00109889
AAGAGCATCGG	0.001088
CAGAGACCTAC	0.00108783
GTCTCAAAGAA	0.00108415
CGTCACTTCGA	0.00108235
CAGCTAACGTC	0.00107004
AGATGGGAATG	0.0010472
AGGAACATAAG	0.00103819
AGATGACAGAG	0.00103252
TCGAATGCCCA	0.00103151
GGGGATCAGAA	0.00102686
AAATTACAACT	0.00101952
ATGGATGGGAC	0.00100523
ACACAGCCTTC	0.00100523
AACGAATCTAA	0.00100443
ATCTTCAGTGC	0.00100221
CTCAGGAGGCA	0.000995892
CCAGGGCTTAG	0.000994138
ACTCGGACCTA	0.000994138
CCTGGTGTGAC	0.000994138
GAAGGGCGGGA	0.000994138
ACGACGGCAGC	0.000994138
TCGGATGTCCA	0.00098371
GTCTGGCCTAA	0.000983629
ACATTGGTGTC	0.000975449
GAGCTCACACA	0.000967036
GAGTAATTCGA	0.000953104
CGGAGGACACA	0.000946805
CGGTACTGAAA	0.000946684
CTCGGACGGTA	0.000943171
ACAAGCATAAT	0.000934589
AACTCGTCCAG	0.000929639
AGGATTCATGA	0.000913419
ACGGAGTATTA	0.000905248
GTCCCGTAGAA	0.000900518
CCCCAAAGCTC	0.000898729
AATAGGGAAGC	0.000895799
CTAAGAGAGCC	0.000895382
ATACCACCTCC	0.000894388
ACTTACCGACC	0.000891401
CACTCATAAAG	0.000889125
CGCGTAAGATA	0.00088538
CTCATGCTAAC	0.000881513
CAGAGTCCGTA	0.000876911
AAACACACTAA	0.000875403
AGGCAACTGGA	0.000873654
CTAAAGGTAGC	0.000848468
GCGTGAGTCAA	0.000844139
CACAACGTCAG	0.000841722
GCCACGCTGGA	0.000840977
ATTACATATGA	0.000837855
ACGGCAAGGTA	0.000837839
GGATCTAGAAA	0.000837839
CTAATATCCGA	0.000837839
ACCCGTTGACT	0.000837839
AGTCCAAGCGA	0.000837827
CACAACCTCTC	0.000837816
CGCAGACTCAG	0.000837816
ATGGCGTCATC	0.000837804
AGACGATATTC	0.000837622
CGAGGCATTTC	0.000834795
ACGCGCTTATA	0.000834689
CCCTTGGGCCC	0.000833031
AGGACGGAGAC	0.00083161
CATTGATTTCC	0.00083161
CAGCCTTGAGC	0.00083161
ACGCGATTGGG	0.00083161
GTCTATAGGGA	0.00083161
CTCGTGTTGGA	0.00083161
ACTCCTGACAC	0.00083161
CAGGTGTCAAC	0.00083161
CGTGTTGCGGA	0.00083161
TCTCACCCAGA	0.000830052
ACGTGTGAGAT	0.000829139
CACATATCCCG	0.000828472
CTCGATTCCGA	0.000828472
CTGCCCCAGTC	0.000828472
GACACTTGACA	0.000828472
CGGAGACGTAC	0.000828472
CCAACTAGTTC	0.000828472
GGCATCTGAAC	0.000828472
GGGACTCTCTA	0.000828472
CCCCCTGGTAG	0.000828472
CCTATGTTCGC	0.000828472
AGGATGAACTG	0.000828472
AAGCGTAGGAT	0.000828472
CCTCTGAGCTC	0.000828472
TCCCTCAGAGA	0.000828472
CCCTACACTCG	0.000826915
ATCTTCGATAA	0.00082686
CCTATATCATA	0.00082531
AACGTCTCTTA	0.00082531
AACTAAGAACC	0.00082531
AGGTAGGCGCC	0.00082531
AGACGAGTGGC	0.00082531
CGTCTCACCAA	0.00082531
ATGACAGTCAA	0.00082531
CCGTCAACCCC	0.00082531
AACGACGGGCA	0.000823191
TTGTGTAGAAA	0.000822125
AAACGGATCGC	0.000818915
GCCTACACCGC	0.000816512
GTTGTAATGGA	0.000813112
AACACACCTCT	0.000801375
CAACACCTAGA	0.000791101
AATTTCCCGAG	0.000788093
AGAACATAGTC	0.000788093
GTCTGAGGTGA	0.000787163
ATGCTACTGGG	0.000786762
CAGTGCACACA	0.000769863
ACGTGCTATCT	0.00076548
AAACGATCACA	0.000764819
CATTTATCTCG	0.000760346
AGGAACCACAA	0.000758905
AGCCGCGTACT	0.000755901
AATCGATGTGA	0.000748845
ATAAGTGCCGG	0.000747311
CCTTACTCCCG	0.000742163
ATTCATCTCCC	0.000738997
ATCATAGTATC	0.000738997
ACTGACAATGC	0.000738997
CGGGTCATCAA	0.000738997
AGTCTCGGATA	0.000738997
CGGGTTTCACG	0.000733633
CGGTCTTACTC	0.000733633
ACTTAAGAAAC	0.000733633
AGCTCTGGACA	0.000731563
AAGTACATAAC	0.000727978
ACCATCAGATA	0.000727978
GGGGCAGACAC	0.000727978
CGATTCACTAG	0.00072764
CCCGTAGGCTC	0.000725147
CAAGTGTATGG	0.000725147
CCAAATCACCC	0.000725147
GTCTCACTGCA	0.000724409
TTACCGGGAAA	0.000724351
ATTCCGTTAGC	0.000724351
GCCCATCGTCC	0.000720838
AGGATTGCTAT	0.000717115
ACGTAGCGGTA	0.000716516
TCCAAGGCACA	0.000715377
ACTAGCCGCAT	0.000714448
GTGCCTTTCAA	0.000714189
AGGCCCTTTAT	0.000711473
GGTGCGTCGGA	0.000708271
ACACACGGTTC	0.000707054
AGACGACGGTC	0.000704719
CCCGTGATAAC	0.000704719
ACCTTACTAAG	0.000704719
CAATGAAAGCC	0.000704719
AGAGAGTCCCA	0.000704719
TAGCCCGTTCA	0.000704719
AAACCTATGTC	0.000704719
AAATTCTCCTA	0.000704719
AGCAGTGCAAA	0.000704719
AGCCTCCTCAC	0.000704719
ACGTGCGTGAA	0.000704719
GCGCAGCAGTA	0.00070335
CTAGCGGCGTA	0.000700814
GCCAACTGCGA	0.000699613
ACGGGCTTAGT	0.000699122
CACACAGAATC	0.000696509
TACAATCGATA	0.0006896
TAACGCACAGA	0.000683014
ACTACGATAAG	0.000683014
CTACGGGCGCC	0.000682758
AGACACTAACG	0.000680427
ATACATGTGGG	0.000678087
AGATCTAGCTA	0.00067716
CGGCTCGCTGA	0.000675311
AGCGGCCCTAT	0.000675311
AGGTTATAAGA	0.000675311
ACTTAGTCACC	0.000675311
GTTGATTCCGA	0.000674486
CGGGCCCGTGA	0.000674486
AAGTACGTCAC	0.000674486
ACCTACATGTG	0.000672782
GATTGACGTGA	0.000672782
AAGAATTGTGG	0.000672782
AATAGCAGTAT	0.000672782
GGTACCCGCAA	0.000672782
CAAGAGACGTA	0.000670243
AAACTCCGTGG	0.000670243
CATTCGTAACC	0.000670243
ACGGACCCTAG	0.000670243
AGGTGTGTCGC	0.000670205
AGAGACGGGAT	0.000670205
GATTAGAGAAA	0.000666655
GTTTACGACTA	0.000665232
GGGCTCGCCTA	0.000660276
AAGTGGTCATA	0.000660276
CCCGTTAATCG	0.000660276
CCCATGAGAGA	0.000660276
ACCTCGGAATA	0.000660276
CGCTCAGACAC	0.000660276
GTCTTCATCCA	0.000660276
GAGTTATGCCA	0.000660276
CTAATTAATAA	0.000660276
AGGGAGCCCGA	0.000660276
ACATTGGCGCA	0.000660276
ATAATTAACCC	0.000660276
TAGCTGTGCGA	0.000660276
GGGTCTCTGTA	0.000660276
CTTGTTTCGCC	0.000660276
AGACCAGACGG	0.000660276
AAAGGGTGTCG	0.000660276
GACTAGGTAGA	0.000660276
GGAGTATACTA	0.000660276
ATATCACGCGA	0.000660276
AGTCTATACTA	0.000660276
ATATCACCGCC	0.000660276
ATTATAGTACG	0.000660276
GGCGACTAGAA	0.000653856
AAGGGATACGA	0.00065266
AATCGTGCCCG	0.00065266
CATGTTATCTC	0.00065266
CCGGCTTTCTA	0.00065266
GAGCAGGAAGA	0.000651572
ACATGCACATC	0.000650112
ATGGGGAAAAG	0.000648225
CACAAGAGTGA	0.000640326
CATGCTGCCCC	0.000639343
CACTCGACTAG	0.000639343
ACATGGAAGCG	0.000639343
CACGGCGAGAG	0.000636336
GTGCGTGAAGA	0.000635493
AGTGAGGTGAG	0.000635493
AGCTGACGGAC	0.000635493
GCCTACCTAGA	0.000635493
CATGCGTTTAG	0.000634869
GTTGGAGACTA	0.00063444
GGACGGGGCAA	0.000633436
ATCGAATTCTA	0.000632421
GCCGCACACAA	0.000630733
GAAGTATCTGA	0.000630733
ATGTGTACAAG	0.000630733
CGGAACCGTCC	0.000630733
CCACGGATATC	0.000630733
CGTTTTTGGCA	0.000630733
AAATCTTTCTA	0.00063066
TGGGCTATCAA	0.000628363
ACTAATTTGGA	0.00062829
CACTAGGGGGG	0.000623484
AGTGCTGCGAA	0.000623292
ATCAAGGGCCA	0.000616748
ACATCACCCCA	0.000616748
GACGCAGTTGC	0.000614852
GAGAGTAGCAC	0.000614751
AAAGATCGCAC	0.000614507
ATCCCGACCTA	0.000614507
CTGCGGTACAA	0.000614276
GCATGAAGGCC	0.000614276
AGACGCGAAGG	0.000614276
ACCGCACCCCA	0.000614276
GACGTGTCACA	0.000613506
TATAACGAGAA	0.00061316
CCGGCCGAAAG	0.000612162
AAGGAGGTCGC	0.000611905
ACTACTAGTCT	0.000611905
CTCACTCAATA	0.000611905
CCAGACCCCTA	0.000611905
CATGAGTTAAC	0.000611905
CGAGTGGACCC	0.000611905
ACATTATATAG	0.000611905
CCGTAGGCAAC	0.000611905
ATCGGTACCAA	0.000611905
CAACGTAATAC	0.000611905
AAAGGGACTCG	0.000601957
GAACCGCACCC	0.000600916
CCTAACTGTAA	0.000600916
AAGGCCAGGAT	0.000596858
AACGCCGAATG	0.000595599
AGGCTGTCTTG	0.000590509
GGTTCTTGGTA	0.000587675
ACTTTCCTACT	0.000587035
ACTCGGATACC	0.000585921
TACGCAGATGA	0.000585921
CTGCCTCCCAA	0.000585921
TCCGCCCCGGA	0.000585921
ATAGGGAAGGG	0.000585921
GCCCGGATACC	0.000585921
TCCCCTGGTCA	0.000585921
CATCGACCATG	0.000585921
GATAGGTCGAC	0.000584634
TACCAGCGAAA	0.000583223
ACTCCCAAGGC	0.000583223
TAGTAATACGA	0.000583223
AGTGTTAGTAC	0.000583223
CCTGGTAGAAG	0.000583223
CTAACAGCCCC	0.000581158
AACTCCCTTCT	0.000577969
ATCTTGCTACG	0.000577969
CCGTTGGGCCA	0.000577947
GACTGTAACAC	0.000574514
ATTCCGGTTCG	0.00057134
GACAGTAGGAA	0.000569178
TCGATGACCCA	0.000569178
AATCCCCCACC	0.000569178
AAGCCCTGACC	0.000564883
GCACCAGCTTA	0.000564866
CACATTGCTTA	0.000564834
ATGGAGCTGAG	0.000562759
ACGAAGCCTGC	0.000562759
GAGTGAAAAGC	0.000562759
CTGCCAGACTC	0.000562759
GACCGCGAACA	0.000560651
CCCCGCCTTGC	0.000560651
AATCGAAGGTC	0.000560651
GTATGCATCGA	0.000560651
GCGGGGATCTA	0.000560651
AATTCTACACG	0.000560651
GGAGCTCCTAA	0.000560651
CACGGATGTGG	0.000560651
AGCCTAACTTG	0.000560651
AGTCGAACTTG	0.000560651
CAGGGTGTCGA	0.000560651
ACATAGATCGT	0.000560651
AACGGAGAACG	0.000560644
CGATACACGGC	0.000560644
TAACCGCCGCA	0.000560644
ACCGTACAGTC	0.000560644
AGCGATCAGTC	0.000560644
GACCCAGGACC	0.000560636
CTAACGCAGAC	0.000560636
AGGGTTCGACG	0.000560636
ATCTTCAACAT	0.000560628
CTGCAACACAA	0.000560628
CGCTGGTAGGA	0.000560628
ATCGGTGCGTG	0.000560628
ACGTCTCGACC	0.000560628
AACCCGACAAC	0.000560595
GGTTACCTCTA	0.000560595
ATTAGACCGAG	0.000560595
ATTTTCTGAGA	0.000560595
ATTTCAACCGG	0.000560518
ATAGCTACCAC	0.000560513
AGAGTTATCTA	0.000558512
AAGCTCCGTCT	0.000558411
CTTCGGTGTGA	0.000556713
ACTAACAGACG	0.000556468
ATCACTATTCC	0.000556468
ATGAAAGGTAC	0.000556468
CCGGTAGGACG	0.000556468
AGATAAGACTG	0.000556468
CTTGTTCATTC	0.000556468
CAAAACAAGTA	0.000556468
CATAGTATGAC	0.000556468
ACTATTGACCC	0.000556468
GAAAAAAGCTC	0.000556468
GACGCCAGACC	0.000556444
GTAAGCGCTAC	0.000556444
ATGCCCGACCG	0.000556444
TGTCTGATAAA	0.00055642
GCCCTTCATGA	0.00055642
CTTACATCACA	0.00055642
AGGTTCGTTTA	0.000556396
ATTTCCTATGG	0.000556372
ACGGTCTCAAG	0.000556276
ATGTTCGCACC	0.00055436
CTGGCCACCAA	0.000553712
CCCCAACGGAA	0.00055233
AACGACCATCC	0.00055233
GACACGGGATA	0.00055233
ACAGACTCCGC	0.00055233
AGACTCGGAGG	0.00055233
CGAGCCGGCAG	0.00055233
GGGCGGTCAGA	0.00055233
AAAGCTGACAT	0.00055233
AGTCGCGAATG	0.00055233
AGGATTGGCCT	0.00055233
CGAACATTCAA	0.00055233
AGAGTATCTCG	0.00055233
CACAGAGCTGA	0.00055233
CGGTCAAGTCA	0.00055233
CGCTGGGGATA	0.00055233
CATCCTACGTA	0.00055233
CAATATATCAG	0.00055233
AATACGGGGCC	0.00055233
CAACGCTTGGA	0.00055233
GTCCTACGTTA	0.00055233
AAACCCCGGCT	0.00055233
ACAGGTACCAG	0.00055233
CGGGGGCCCTA	0.00055233
ACCCCTAAAAA	0.00055233
CGAGTGTTTTC	0.00055233
ACGGAGATCTG	0.00055226
CACACGACTCA	0.00055226
CTAGCATAGCA	0.00055226
ACGCGTGAGCC	0.00055226
GTTGTCTGGGA	0.000552254
CGTAAGTGGCC	0.000552157
GCCCGTACGAA	0.000550946
CAACATCAAAC	0.000550571
CGGAACCGAAA	0.000548329
AAGGGAGCGAC	0.000548146
GCGAAAATAGA	0.000548146
GCGCAGTAGCA	0.000548146
CACGTACACGC	0.000548146
GCCCAACGAGA	0.000548146
CGTCAAGCGAG	0.000548146
ACCGAGGTTTC	0.000548146
CACTGAAGATG	0.000548146
CCTCGATAGTA	0.000548146
CCTCGTGTGAG	0.000548146
CCACACTCCAC	0.000548146
CTCCGGGTGTA	0.000548146
ACTGTGTCCTA	0.000548146
GATATTAGGGA	0.000548146
AAGTTGACACT	0.000548146
CCGTAGGTTAA	0.000548146
CGGGCTGAGAA	0.000548146
CTGCAAGCTAC	0.000548146
ACGGTAGGAAA	0.000548146
AGGGTCAGAGA	0.000548146
TCTACAACCCA	0.000548146
AACTTCCGACC	0.000548146
ATACGTCTCGA	0.000548146
GAGATCAGGTA	0.000548146
AGTGAGTGACG	0.000548146
ACAAAACGCGA	0.000548146
CGTGTGGAGAC	0.000546054
CGTACGGCCTC	0.000546054
AGAGAGACCTG	0.000546054
ACAGCTTCGAT	0.000546054
ACGTCCCTTCT	0.000546054
ACCTTTGAGCA	0.000546054
ACAAGTCGGCT	0.000546054
CTAAGAATGGC	0.000546054
ACTCTACAATC	0.000546054
CTCAGGGATTC	0.000546054
ACCGATGTGAA	0.000544342
ACTCTTGATAG	0.000544144
ACAGCGTTACC	0.000544036
CGCGTTTATGA	0.000543946
CGCAACTAGGA	0.000543931
GAGTGTAACAC	0.000543931
ACGTATGGCGA	0.000543931
ACATCGGTCCC	0.000543931
CAGTGGCATGG	0.000543931
GACACGTCGTC	0.000543931
ACGGAACCTCA	0.000539683
AAAGACGCCTC	0.000537694
AGTATCCTTGA	0.000537151
AGCCGCCCCAG	0.000537099
CGTAGCTCGTA	0.000535454
AATCGATTTGC	0.000535454
ACCAGTGCTCG	0.00053425
CACCTGCCGCG	0.000533605
TGGAACATACA	0.00053167
CCTGATTAAGA	0.000531598
ACTAAACATCT	0.000529221
GAAAAAACCCA	0.000525279
CTCAACGAGCA	0.000523133
ACTACTTTATG	0.000521126
CCGTAGGTGGA	0.000521126
TGCGTCAAGCA	0.000521126
AATCATAGACA	0.000521126
ATACTAGGTAC	0.000521126
ACATGAGATGG	0.000521126
TGTCTCGTTAA	0.000520172
TCGCAGGGAAA	0.000518504
AACCCTATCAC	0.000517754
CCTCTGGACAC	0.00051717
ACTTAGAGAGG	0.000515703
GAAAAGCGCAC	0.000513756
CGCTAACGCCA	0.00051032
CTCTGTTGTCA	0.00051032
AGAACGCCTAT	0.00051032
ATCGTATTGTC	0.00051032

## Sheet: Cefepime
Feature	Importance
GCAACCTGCAC	0.00136971
AGTCACCTTCG	0.00125945
CATCGTAAAGG	0.00105232
CGTACAGCTAG	0.000966011
AGCATGACCAG	0.000927074
ACAGAGATTCG	0.000912526
GTTCGTACATA	0.000840768
CATCTATCTAA	0.0008326
AAGCACCGGCC	0.000792714
GTACTAGCGCA	0.000788579
AAAGACCCAGT	0.000751754
CTCCTAGCCAC	0.000742679
CACCAATGCGA	0.000735793
ATCTTCAACAT	0.000727547
AACCGCTCCAA	0.000722021
CGCGAAGTGGA	0.000718364
TAATAACCTCA	0.000711031
CGGTGTCAAAA	0.000709045
ACTGTAGTTGG	0.000703151
GTTAGTGGAAA	0.000696101
CTAGGATACCA	0.000692106
CCAGTATCAGC	0.000678948
CATAGCGGAGC	0.000677936
CTGAGGCTTTC	0.000650998
CAGAGGCACTG	0.000616679
GAGCCTGCTGA	0.000613286
AAACAATACCC	0.000589713
CCGGAAATCGA	0.000561386
CAGTTTAGTAA	0.000553769
GCCTAACACCA	0.000542894
AATGTTCCACA	0.000541947
TACAACGTATA	0.00054117
GGATTGTAGCA	0.000529554
GCTGAAGTGTA	0.000525749
TCCGTGAGCCA	0.000517745
ACCGCTCCAAC	0.000513277
ATTAGGTGACG	0.000511124
AAAGCAAGCGA	0.000509673
AGGTACTTTGA	0.000508643
CTGATTGTTAA	0.000501932
ATACCACGCCA	0.000499175
CCATGAAATTC	0.00049707
CAGAGGGTCTA	0.000496554
TATCATGGTGA	0.0004963
GATAGATCAAC	0.000489757
AACATAGATCT	0.000485386
AGCTTCTTGCC	0.000478306
ATCTTACTGTG	0.000478015
ACTCATCCGAA	0.000476661
ATGATTATGCC	0.000473718
TATGTAAGTAA	0.000471214
AAAGTAGGGTT	0.000470454
GCAATCGACTA	0.000469845
GCGCAAACGAA	0.00046943
TCATTGAGCGA	0.000468902
ATACTGTGATG	0.00046822
ATTACTACCGC	0.000468103
ATCCCTGAATA	0.000467941
ACGTATACGAA	0.000467938
TCAGAACTTCA	0.000467775
CTGAACATAAG	0.000466735
AGAGCCCAAAC	0.000464075
GCAGGGAGGGA	0.000463511
TCTCATAGCCA	0.000463228
GGGAAATACAC	0.000461263
GCTCAAGTGGA	0.000461012
GAATACTGTGA	0.000460384
AAACAGTACCG	0.000454417
GTGTATTGGTA	0.000451598
GGAAGGAATGA	0.000449955
AACAGCAAGGC	0.000448576
AATCTTACCTG	0.000445288
GCCATCGAGTA	0.000445284
AGTTCGTTGGG	0.000442572
AATAGGTGTCG	0.000440266
CCTCGGTCGCA	0.000439883
CATGTCAGAAA	0.000438571
CTACTTGTGGA	0.000437416
ACAAAAACTGG	0.000437282
AGGTTGCTGCG	0.000435018
AATACCTCTGT	0.000434497
CTGCCCGCTTA	0.000434405
CCGTTCTACAG	0.000434173
AAGTGTTCGGA	0.000433708
CCACGCTATTA	0.000433393
CACGGAAGGAA	0.000433338
ACCCCTCAACG	0.000433002
CCAAGAAACAG	0.000431865
GCCCGGGCTAA	0.000430539
AGAAAGGCGAT	0.000430266
CAGTGGATGGC	0.000428831
ATCGTGCGGGA	0.000428472
GAGAATGCCTA	0.000428252
GGTACCATAAA	0.000427068
GACTGAATAAC	0.000426802
CAATGCTGGTG	0.000426395
AGGATGGAAGC	0.000426192
AGGCTGAAGAC	0.000423701
GTTCCACGCTA	0.00042305
ATCGACCCAAG	0.000422976
GGAGTTCTGAA	0.000422551
CCGAGCTACAG	0.000420216
CGGCTCCAAAA	0.000420071
AGGTGAAAGAA	0.000419746
GGTTCAAGGAC	0.000419724
AATTCATGGCC	0.000416217
ATGTCTGCATA	0.000414994
ACCAACCTACT	0.000414624
CTAATTCGCGC	0.000413178
ATGAAGGCACG	0.000413106
TACAGGCGTAA	0.000412286
GCTCCAACACC	0.000411697
AATTGTCCAGC	0.000411658
CGACAAGGATA	0.000410043
GAAGGATAGCC	0.00040828
AAGAGCTCATA	0.000404899
ATACCTCTGTA	0.000404714
ACTGCGTCGCT	0.000404313
CCGGAACTAGA	0.000404183
GTCTTCACCTA	0.00040409
CCGCCCAACCA	0.000403027
CGCGCCTTCAA	0.000402756
AAATCTCCATC	0.000402527
CCAGGATAATA	0.000400588
GGTGCTACCGA	0.000400428
CATGGATGCAG	0.000400273
GGCGTAGCGCA	0.000399847
CATAGTGTTCG	0.00039931
CACACGGCGGC	0.000398566
GCCCAGGTTAA	0.000398317
ATATAGGTGAT	0.000398126
CTGAGACCCTC	0.000397971
AAGTAGCGCGA	0.000396966
AATACAAAGCT	0.000395928
ATTTCACACGG	0.000395474
ATGGTAACGCA	0.00039495
AAGAGATCCGA	0.000394526
AGGTCATTGAG	0.00039437
CCATCTCTAGA	0.000393878
GATTCACCTGA	0.000393305
GTCTAGTAAAA	0.000392041
GCGGTGCTTTA	0.000391503
CAATAATTACC	0.000391052
GAAACGAAATC	0.000390701
ATGCTTTCATC	0.00039044
CGGAAATGCCA	0.000390043
CTGCCACTGGA	0.000389999
AACTATTGAGG	0.000389863
CAGCCACAGCC	0.000389863
GCCCCTTGTCC	0.000389195
CACGCGAGGAC	0.000388792
GCCTTTCGCCA	0.00038857
CATTGGAGGGG	0.000388152
AATTATACAGC	0.000387888
TCGACTATCCA	0.00038761
CCTCTGCTAGA	0.000387236
CAATAGGTGCA	0.000387164
CGCCGCCTACA	0.000386197
AGTAGAAATTC	0.000385427
CTGATTCCGAA	0.000384869
CAGCTACGAAG	0.000384547
GAAGTCTTTCC	0.000384534
CCTGGGACTTA	0.000384439
TCCACACAGCA	0.000384039
ATGGGTGCGAA	0.000383218
CATAAGATAGC	0.000383119
CTGCCGCCGTC	0.000382826
CTGGCTGGCGA	0.000382256
TCACTATGAGA	0.00038187
CTCCCAAGTGA	0.000381789
ACAAAGCTATC	0.00038148
ATGATGCTGAC	0.000380474
CCAGCCGTGAA	0.000380019
GGTCGAGTGCA	0.000379532
CAATGACACCG	0.00037876
GAGCTCTTATA	0.00037853
GATTCGAAGGC	0.000378492
CTATGCCTTAC	0.000378312
AATCGCTGGAT	0.000377681
ACAGCTCTGTA	0.000377268
GAGCGAAGATA	0.000377065
GCTGACAATAC	0.00037687
CCTTCACTACG	0.000376608
TACAGCTAGTA	0.000376558
ACGGGGTGGTG	0.000375276
GCCATCATTCC	0.000375273
CTATCTAGGTA	0.000375203
AGAAACGAACT	0.000373793
GCTGCAGGCAC	0.000373086
CAAAGCTGACG	0.000372836
TACCCACGCAA	0.000372733
AATACTTAGGT	0.000372687
AAGCACCTCAG	0.000372413
ACGATGGGGAT	0.000372151
TGGTCTCAGAA	0.000372093
AGCAACGATTA	0.000371448
ACCTCTGTACA	0.000371033
ATTTTCGCTCC	0.000370371
ACCCGCTGCAA	0.000370018
CCTAGACCCTC	0.000369316
CTGCGCCGTTA	0.000369207
GACAACTTACC	0.000368249
GCCTCTGTTAA	0.000368076
ACAGCCGAGCT	0.00036745
AACAAACGATG	0.000367307
GCTTGGTGAAC	0.000366255
AGTACCGGTTG	0.000365953
CGTGTTTGAAA	0.000365854
GAAGATCTGGA	0.000365359
ATGTATTAGAC	0.000365279
AAGGTGAATAG	0.000364817
GAGGCGCACCA	0.000364676
AAACTGCAGCC	0.000364134
CGGTAATCGAA	0.000363777
ATTCGATATGG	0.000363074
TATCCCACCAA	0.000362043
CAGCATATCCA	0.000361744
AAACAGTAAAC	0.000360649
GGTTCCATCCA	0.000360129
CCAGATATAGG	0.000359872
GGTAGAACAAA	0.00035945
AAGTTGGTGGG	0.000359419
ATGGCTGGGTG	0.000359209
ATAAATATATC	0.000358554
AAACACACGGC	0.000358519
GAACTCATGGA	0.000358327
AAATCGGTAGT	0.00035771
ATTCACGGAAG	0.000357434
CACTACTTAAC	0.000357098
CCAAACCGAAA	0.000356841
ACTGGAACGCA	0.000356742
CGTGCAAATTC	0.000356341
GGGCATTAAAC	0.000356264
CGGGTTTCCGC	0.000356254
ATGTGCCGCCC	0.000356223
CCGGATCATCA	0.000356028
CAGACTGACAA	0.000355591
AAACTATTATG	0.000355492
ACTAGGTTATC	0.000355143
GCCCGGACTAA	0.000355075
ATAGTATTATG	0.000354646
GTGGCTGATAA	0.000354432
GTGCGGTTGAA	0.000354326
AGGGTTGGTTA	0.000354186
GGCGCAAACGA	0.000353841
GCCACGACGAA	0.000351949
CCTGTGCCCAC	0.000351646
GAAGTATCTCC	0.000351531
GTGTGACCTCA	0.000351267
CAAAATTTCTC	0.000350225
AGTTAACCCGA	0.000350133
CGACCACTGTA	0.000350056
AGGTCTAATCC	0.000349932
CGTTTCTGAGA	0.000349614
AGACCGTTCCG	0.000349147
GTGGACATATA	0.000349078
CTAGGCTTACC	0.000348565
GCCAGAACAAC	0.000346807
ACATAGGTGCA	0.000346807
ACTACAAAGAC	0.000346783
ATTCTTCCAAC	0.000346552
AGTCACGTTAA	0.000345719
CGACCCTGAAA	0.000345655
ACTCGGCGTAC	0.000345574
AAATGGACTCT	0.000343613
AGATAGATGCT	0.000343418
AACTCGCTTAT	0.000343397
TGAGCTTCCCA	0.000343331
CCCAGCGCGCA	0.00034331
ACATAGAGCGG	0.000343247
CATGCTTGAGG	0.000343201
TCCTAGATCGA	0.000342306
AAATAGGAAAC	0.0003423
GCTGTCATGCC	0.000342177
ATTCTCGTGTG	0.000342091
CGTTAGTGGAA	0.000341664
CAGCAAGCCAC	0.000341222
ATACCCAAAGC	0.000341204
AAGGAATGATG	0.000340989
GGAGAAAGCAC	0.000340386
AGACATTTCCA	0.000340279
ATGAAAAGCGC	0.000340131
AAACATCGACC	0.0003401
ATCAACCGATG	0.000339666
ATAGATAGGAC	0.000339429
AGCAGACTGAG	0.000339081
CATGCTAGCAG	0.000338761
GCTAATGGGAA	0.00033871
ATCTAGGATAC	0.000338672
CAACGGTTGCA	0.000337955
CCATTGATTAC	0.000337707
TGAGGATCAAA	0.000337323
ACGCAAGTGAA	0.000336893
ATAACGTGTAA	0.000336849
AACAAGCGCAC	0.000336807
ACAGGGTTGGT	0.000336807
ACCAGTCGTCT	0.000336453
TTCTATCGCAA	0.000336092
CTGGACAGAAA	0.000335958
CACTACTTTAC	0.000335334
CGCAATGAGAA	0.000334596
CACCGTGAATC	0.000334499
TAACGAATCTA	0.000334302
CGAGCTAGAGC	0.000334024
ACCAAATGCGG	0.000333395
ATAGGGGCCAC	0.000333234
GTGCCTCTGTA	0.000332482
AAAAGATGTTA	0.000332176
CTGACTATCGC	0.000331778
GCTGATTAATA	0.00033152
AGGGCTACACT	0.000330663
ACCTTACTCCA	0.000329728
CAAGGTTCTGG	0.000329641
AGGAAAGTTCA	0.000329641
GCATGTGAGGC	0.000329637
AGGAATTTATA	0.000329541
AGTGCCACAGC	0.000329083
CGGCGAATAGA	0.00032882
CCGTTGATGAG	0.000328799
CTATCAAGAGA	0.000328067
AACAGTCCCGC	0.000327925
ACACTGTAGCT	0.000327743
AGGCGAGCATA	0.000327721
CTCTGTGGAGA	0.000327705
CAAACCCTATA	0.000327647
GTAGTAATCAA	0.00032732
ATGGGGGCGCA	0.00032676
CCTCCATATCA	0.000326354
GTAGAAGAGAA	0.000326065
AACGCAACGCT	0.000325576
ACGCCTGTAGC	0.000325573
CGCTTGGCCTC	0.000325573
GACTACTATAC	0.000325203
ACCTGAGCGAG	0.000325007
AGAAACGTGTA	0.000324982
CATGAACGGCG	0.000324865
CCAGCCCGATA	0.000324854
AGGGCCGGTGC	0.000324459
ACCCTCACCAT	0.000324256
GGTCTGTTTCA	0.000323828
ATGTCTTACAC	0.000323727
TCTTACCTTAA	0.000323338
AACATTTCCGC	0.000323336
AGCCTCAGACA	0.000322771
AGAGGCGATTC	0.000322731
GCTTACGCTCA	0.000322352
AAAGAGCTTCT	0.000322193
ATAAGTGGGTA	0.0003221
ATGTTCCACAC	0.000322073
CAAGGTCCAGC	0.000321852
AGTCAGGTTAG	0.000321376
AGCGCAAGTCG	0.000320824
CAACGAACTGA	0.000320562
AAGAACAGTCT	0.000320556
CTTTTCAAACC	0.000320015
TAGTAGACTGA	0.000319921
AACGTGCCATA	0.000319459
TGAAAGTGGCA	0.000319263
AAGACGTCACA	0.00031902
AACCCGATAGT	0.000318899
GCCAGGCATAA	0.000318666
GTAGTGTCAGA	0.000318543
AAAATGCTACG	0.000318186
CTAAGGTATTC	0.000317839
CCGGTTTTAAG	0.0003176
GGCCGAACCTA	0.000317546
CCTATCGGGCA	0.000317448
AGCCACCAGCA	0.000317243
ACGATGTAGAT	0.000317205
AAACCCACGAC	0.00031677
AAATCAAGCTA	0.000316676
GGAAAGGATCA	0.000316
ACGGAATGATG	0.00031492
GCGCACAAGAC	0.000314686
ATAATATGGGG	0.000314512
TAAGTAACATA	0.000314409
CAACTATCTCG	0.000314041
TCGGGCTGGAA	0.000313833
CGCTTATATGA	0.00031369
CCAAAGCGCAG	0.00031337
ACAGAAGGCGA	0.000313051
GAAACTTGGAA	0.00031297
CCGCCAAGTTC	0.000312782
AGTGACACAAC	0.000312634
TAACACAACTA	0.000312519
CGCTGCTTGAA	0.000312418
GGAGAAACTAA	0.000311958
ATTTAGATTTC	0.000311745
CCACGATGGGG	0.000311702
TCGAAACTGCA	0.000311269
GGGACAGTGAA	0.000311253
CTGGTTGCAGA	0.0003112
CCGTGCAGGGA	0.000311164
GGAAGCCTTAC	0.000310681
GAACACGCGGC	0.000310641
CATAGAGGGGA	0.000310595
CAATCTGACTC	0.000310231
GAAAAGAACGA	0.000310121
TAACAGAGGCA	0.000310066
ATGGAAACACC	0.000309771
AATAACATCCC	0.000309544
AAAGTCTGACC	0.000308694
AGACCACTTCA	0.000308468
ATCAGATCTAC	0.000308051
AAGCTTAGGAC	0.000307597
ACTTGGCGACA	0.000307597
ACAACATCGCC	0.00030759
TATAATATCAA	0.000307525
GCTGTTAATTA	0.000307192
CAGTCATGTTA	0.000307192
ATCACAGACTG	0.00030695
ATTCGATCTAG	0.000306931
ACAAATTGGGA	0.00030667
TCGTTACGCCA	0.000306626
ATTATACAGCA	0.000306601
CATAATGCTTC	0.000306597
GCAACGAACAC	0.000306566
CTGGTACATAC	0.000306076
GATGACACTGC	0.000305635
ACTGCACCCAG	0.000305581
CACAGAGAATA	0.000305491
CACGCCTGCTC	0.000305464
AGGCTGGGTAG	0.000305272
AGATAAGAACC	0.00030516
CGATGAGCGAA	0.000305126
ATACTACATTG	0.000304852
CGGCATCTCCA	0.000304703
ATGACCACGCC	0.000304673
AGTAGATCCGA	0.000304482
AAGCTCCAAAG	0.00030411
AGCGAGCAAGA	0.000303769
GAGCCTTTATA	0.000303517
GTGGTCGTTTA	0.000303486
AACCTGCACCC	0.000303477
AATGACGTTGT	0.000303359
GCCATCAGTCA	0.000303288
AAGATTCGCAC	0.000303247
CTTTGCTAGCA	0.000303155
GAATTCTGCTA	0.000303069
AAACACGCTTT	0.000302454
ATGCGTTCCAG	0.000302422
GAATCATTCTC	0.000302366
TGGTCGCGACA	0.000302266
ATTTTTGGGTG	0.000302149
AGAGATCAAGA	0.000302014
ACCAGATCCGA	0.000301896
CATCGTATGAC	0.000301801
GTCACATTGTA	0.000301782
CTCAAAGGGGC	0.000301164
AAGGGATGTGC	0.000301065
AAACCTTCTTA	0.000301045
AACCTAAGGAC	0.000300745
GTACACGAGCA	0.000300722
AACCAGATCAG	0.000300136
CCCGATATGCA	0.000299977
AGCTTCGTATA	0.000299477
GCGCAGGTTGA	0.000299451
AAGAAACCGCG	0.000299442
CGGGCTAGCAG	0.00029922
ATACCCTAGAC	0.000298894
ACTTGACGACT	0.000298651
CAGCTCGTCCA	0.000298457
CGACCAGGTGA	0.000298174
GAAGTATCGAC	0.000298082
ACCATAGAACT	0.000298039
TCTTGATCCCA	0.000298036
CAGGTCATGGC	0.000297835
CCCGCCTTGTC	0.000297714
AAAACTGGATC	0.00029746
AATTAGCCGCC	0.000297453
ACGCTCGTCAA	0.000297292
ACGACGATAAC	0.000296902
CAAAAAGGGTC	0.000296784
AACAGTGAGAG	0.000296738
GAAAGAATAGA	0.000296691
CAGGCGCACAA	0.000296675
CACCATTGGCC	0.000296546
CGATCGCATCG	0.000296342
ATACTGTTGCA	0.000295884
AGAGATTCGCG	0.000295713
ACGTACACCCG	0.000295511
CTGGGTGTGAC	0.000295439
AATGCGAACGC	0.000295285
CAGTTGACAAG	0.000295083
ATAGCAAATTA	0.000295013
AAACTCGTCTT	0.000295013
ATCTAACCGGA	0.000295008
ACTACCTTCAA	0.000294842
ACTGGCTTGGG	0.000294629
AGCGCCGGACG	0.000294615
CATTCCAGTAA	0.000294527
ACACAGACTCC	0.000294419
AGCTTAGATAG	0.000294134
TGCACCGACAA	0.00029409
ACTTAGCGAAA	0.000293829
ACTTTCCCTAC	0.000293566
ATGAGACGCCA	0.000293301
CCGCCGTAGAG	0.000293236
CACTAATGATA	0.000293052
ACCCTACTTTA	0.000292987

## Sheet: Ceftazidime
Feature	Importance
CCGGGTTGTCA	0.00359197
TCCACTAACGA	0.00255862
AAATTGTCCCG	0.00238931
AAAAAGTGGAG	0.00216588
CGTTCCTCTAA	0.00204211
TACTGTGATGA	0.00194154
CATTTTTCTCC	0.00188157
CTGAAGTGTAA	0.00187073
AGATTCGCGGG	0.00182209
ACCACCTATGG	0.00172576
CTGATACGGAC	0.00171087
CTCCCAAGTGA	0.00170087
AACAGTCTATC	0.0016948
AAAGGGACAGT	0.00169412
ACTCGTTGAAG	0.00164332
CAGTCTACTAA	0.00163095
GTGCCTCTGTA	0.00162654
CATCACAGTGC	0.00162584
GGACCGACTAA	0.00162546
ATACTCTGTAC	0.00162184
GTCCCGGATGA	0.00160992
AACGCCCAATC	0.00158719
CTTGCGGGAAC	0.00156921
AACACTTCCTG	0.00156909
GCTATAAGTGA	0.00153826
GATCAAGGACC	0.00153348
AGAACAGTCTA	0.00151174
AGAAAGAGATC	0.00149885
AAAGGCTGGCT	0.00149657
TCGTCGTGACA	0.00146603
GCAGACTAGGA	0.00144113
CAAGATCCGGC	0.00143491
CGCTAAAAGTA	0.00141717
CCGGCCCTACG	0.00141315
CGGCATCACTA	0.00136003
ACTGACACTTA	0.00135137
CGACGTAAGTC	0.0013265
CCTGGGAATTA	0.00130368
CGATAAGTCGC	0.00126909
CAGACTGGCCG	0.00123701
ATACGTTCCTC	0.00123495
GAATCACACGA	0.00120837
AGCCCAAGGCG	0.0012071
ATTCGGGGGCA	0.00119875
CACGAACTGCC	0.00117252
TCCCTTTAGGA	0.00117214
CACCAAGCTTC	0.00116344
ACAGTCCCGCA	0.00115477
ACACCCTCATG	0.00115132
CCCTCAAGTGC	0.00114624
CATGACTGCAC	0.00112153
GGTATGGTTTA	0.00111679
ATATATAGGCC	0.00110267
AAACTGCAGTG	0.00109475
GTCTAGAGCGA	0.00108996
ACACTTAGAAC	0.00107959
ACGACCAGGTG	0.0010775
ACTTGCGGAGA	0.00107419
GCACCGAGCTA	0.00106758
GGGCGAACAAA	0.0010616
CACTGGAGCTC	0.00104521
CGGCTTGAAAC	0.00103596
ATATTATCTTA	0.0010329
CTGGGTGGGAA	0.00102836
ACTGGAGCTCG	0.00102791
GGGCATTAAAC	0.00102676
GGCTCACGGAA	0.00102543
AGATTAAGCTC	0.00101025
CACTCGGCACC	0.00100888
CACAAATATCA	0.00100285
ACCTGCGCTTG	0.000999513
ACGTCAAAGTG	0.000997215
CGGCGTAGGTC	0.000992794
CTGATTCCGAA	0.000992367
CAGGCCGCCCG	0.000991966
GGATTTTTCCC	0.000991828
CGTCGTGACAA	0.00098495
CATCCGGGGCA	0.000977391
CGCGTATTTCC	0.000964895
CGCTTGGGAGC	0.000959509
ACAGAGCCCGC	0.000958108
GTTTCGCACGA	0.000957829
CAATGCCCCCG	0.00095486
CGATTAGGGAC	0.000950414
AATTGTCCAGC	0.000949842
CCGAGGGAATA	0.0009488
GAGACATTTCC	0.000941504
GGTGTTCCGAC	0.000940261
ACCGAGCTCCA	0.000932286
AGCACTACCCA	0.000931848
ACTACGGCAGT	0.000928306
AAGGCCGAGAT	0.000926508
CCCGAATCGGC	0.000924859
CGTGCAAATTC	0.000920246
CCTGCGTTGTC	0.000919361
GCGCAGGTTGA	0.000919016
CTGGTCCTTCA	0.000916829
GACGTATGGAA	0.000915016
ATAATAGAGTA	0.000914156
GGAATTACTAC	0.000913128
GGCAGCCTGAA	0.000909571
GACCCTCTGAA	0.000907902
GTCCTTGTTCA	0.000907065
GCTGAAGTGTA	0.000905136
CTCACCTGGTC	0.00090434
AGTGCCACAGC	0.000902994
AGTAGCGCGAA	0.000901269
ATACCTCTGTA	0.000901043
CAGATCTACAC	0.000900875
AAAAGGACACC	0.000897973
ATTGACACTAG	0.000897595
TACAGCTAGTA	0.000897557
AGACCAGGCAT	0.00089738
TGACGGCGGCA	0.000896944
CCGCGGATATA	0.000896569
AACTGTCCCAG	0.000896146
ACAGGGTCAAA	0.000892192
AGACCATGAAC	0.000888366
CCGCGAATCTC	0.000888077
ACCCACGCAAG	0.000886471
GCTCTAGGTAA	0.000883741
CCCTCTCACTC	0.000883291
ACACTGGAGCT	0.000879381
AGTTATAGAGC	0.000878842
GAGTAGGGTGC	0.00087749
AGGCCGAGGGA	0.000876826
CACCTACCAGC	0.000874919
GGTTCAAGGAC	0.000874577
CTGAAGCGAAC	0.000873677
GTTTTCTCTCA	0.000873675
TACTAAACTGA	0.0008729
CATATAGCGTC	0.000872255
GGCCCTAAACA	0.00087165
GACACTATGCC	0.000868311
CACCGAGCTAC	0.000865286
ACTCATCCGAA	0.000864971
GTTTCGTAGTA	0.000863497
ATCTAGTTCCG	0.0008568
GTCGTTGGGTA	0.000856798
CTTTCAAGGCC	0.000856378
ACGTTAAACAA	0.00085402
AGGGATGCTCG	0.000853385
ACACGTAGTAT	0.000853042
ACGTAGGGCCG	0.000852774
TATGTAAGTAA	0.000852743
GGAAGCCTTAC	0.000851973
CAGACTAGGAA	0.000850847
ATTTATCTCAC	0.000850548
CATGCACCCTA	0.000849535
CGTACAGCTAG	0.000849066
CGTTGGTTGAG	0.000848744
CATGGATGCAG	0.000848416
TAGCGTAGGGA	0.000847005
CTAATTCGAGA	0.000845889
CCAAAACTCTC	0.000845212
CATTCCCTGGG	0.00084353
GCAATTTGCTA	0.000842653
ATAGTGCCTGC	0.000842388
AAGAGCGTCTA	0.000842096
CCTGACTATTC	0.000841467
AATAGTGCCTG	0.000840268
ACGACTATCAT	0.000839558
CGGGGTGAAAA	0.000835272
AGTAGACTGAT	0.000834735
CTATTTCATAC	0.000833116
AGGCTGTGAGG	0.000832825
TTAGTGACGAA	0.00083184
CAATAATGTAC	0.000830753
CACTATACGCA	0.000829567
CAGTGGGTGGC	0.000829394
CAGTGACTGGG	0.000828784
CTCTAGGTAAG	0.000828702
CGTAAACGAGC	0.000828483
CGCTCCAACAC	0.000828352
CTACAGACGTA	0.000827229
GTGTCTGCATA	0.000826024
CCCAGCAAGGC	0.000825505
CAGAATCGAAC	0.000824297
GATCCAGGAGC	0.000823866
CGTGTACTAGC	0.000821754
AAACTGCAGCC	0.000821025
AGTTGAATGAC	0.000820997
CGTGGTTAAGC	0.000818847
GATCAGTCTAC	0.000816104
CTATTGAGGAA	0.000815607
AGTGAAGGTTG	0.000812809
AAATTTTCGGC	0.000812182
ATCAGTGAGCC	0.000811475
GGCATAGAGCA	0.000807484
CGGCTCTCCAA	0.000806267
AGAGCGTGTAC	0.000804534
CTTTAGGACTA	0.000803454
CTCACTGATGC	0.000801352
GACGCTGCACC	0.0007991
GTTATGACAGA	0.00079871
ACCTGACTTGC	0.000797834
CTCATGAAAGC	0.000796208
AACCGGACCGA	0.000792431
ATTATTTAGCG	0.00079219
GGAGAAAGCAC	0.00079119
GATGTACCAAC	0.000791185
TCGTAGTATAA	0.000790371
GGAAGATTCCC	0.000789061
AGTTCGTTGGG	0.000788424
AAGCCCCTTTG	0.000786793
ACCAGTATCTG	0.000786577
ATCCGCGACGC	0.000784475
CTTGGCCAAAG	0.000784128
GGCAGGTACTA	0.000782258
GAATAGGATTC	0.00078199
GCTGTACGTGA	0.000781586
ACCGTCCTTGC	0.000781431
AGAGTCTCTTA	0.00078125
CGTTTCCCCAA	0.000780554
ACGTTTGCTCT	0.000778697
GTCCACCTAAC	0.000778538
CAACAGTATTC	0.00077671
GGTGAAGTCTA	0.000776014
CTTTTAACACC	0.000775111
AAACCCCACAC	0.000773682
GAGGGATCGAA	0.000773555
TACAATTATCA	0.000773542
CTCTAACTTTC	0.000773432
ATAAGTGGGTA	0.000773145
AAATATAAGGG	0.000771273
GGTACGGGCTA	0.000770812
AAACTAGGAGA	0.00077056
CCTTTTAACAC	0.000770381
ATTGTTACACG	0.000768682
ATATTAACGTG	0.000768682
TCTCTTGGTAA	0.000768489
ATCCGGTTAGA	0.000765965
AACAAGGATTA	0.000765259
AGAGCGTAGCT	0.000764446
CAATACACCGC	0.000764215
CTCTTACTAGC	0.000763007
CCCATTGGCTC	0.0007624
ACAACAAGGAT	0.000759695
ATATGGGGATG	0.000758788
CTGCTTGGGCC	0.000758486
CTAGCTTCAAG	0.000757887
CCTATCAAAAG	0.000757529
GAATCTTCTCC	0.000757465
CTAACCTCATC	0.000757353
GCACTATACGC	0.000757171
CTATCTCGTGC	0.000756988
GACTTGTTAGC	0.000756769
ACATAGATCTC	0.000756195
CTACACATATC	0.000755448
AAGCACCTCAG	0.000755141
ACTCGACGAGT	0.000754888
CAGTCGTCTAG	0.000754442
ATTAACTGTTA	0.000752364
GGGTTCATCAC	0.000752072
CGCGGATATAG	0.000751688
ACAGAGTCTCT	0.000751173
CGTGAATCCTA	0.000751104
AGGCCGAGATA	0.000751038
GTCGGCTGTAA	0.000750652
ACGTGGACATA	0.000750169
CGGTACACCGC	0.000749637
ACTAACTACCT	0.000749217
CCCTGATTAAG	0.000748804
GCCCGAATTAC	0.000747582
ATGGGCGGATG	0.000746583
ATCCCTCCCTG	0.000746085
ATCGTGCGAAA	0.000745044
CCGCTCCAACA	0.000744324
CGTCAATGCTC	0.000743239
ACCAAGCTTCG	0.000742397
AATAGCGTCGC	0.000740384
CCATGATAGTC	0.000740088
CAACTGATGCG	0.00073927
CATCGTACCAG	0.000738297
GTTTAGGGCCA	0.000737669
CACGGCAAAAA	0.000737432
ATTCGGGTGCA	0.000737201
CATCTATCTAA	0.000735655
AGACGGCATTC	0.000734421
CAAACCGTTAC	0.000732946
AGGATCCGCGA	0.000732796
AACGCGAAGAG	0.000731661
ACTTATCCCAC	0.000731439
GATTCGGGGGC	0.000730492
ATGATTCGTTA	0.00073021
GTTACCGCGGA	0.000729811
ACTGCTCCGCT	0.000729682
ATGTCCGAAAT	0.000729177
GTACCTAGATA	0.000728887
ACTGAACTACG	0.000727574
ACTGTCGCCTC	0.000727285
GTCCTAAACAC	0.000725397
AATCAGGGCAT	0.000725087
ATGTACGAACG	0.000724238
ACGTTAATCGA	0.000723758
ATCTATACGAA	0.000722867
ACTGCAGCCAT	0.00072236
GGAAAGACTGA	0.000721672
CCTCAATACGA	0.000721079
AATGGGCTATC	0.000720441
GCCGTCTAGAA	0.000720408
AGATCCCGCTC	0.00072036
ACTTAGTAGAA	0.00071905
CCGTTTCCCCA	0.000718257
ACAAGGTACAG	0.000717979
CAAGGCAACGC	0.000716882
AATATTCTGAG	0.00071651
TGACGCGCGAA	0.00071648
CCCTCTTATAG	0.000715228
AACTCGTGACA	0.000715022
CCCACCATAAG	0.000715008
GTCAACGGCCA	0.000714403
CCCGACTGGAA	0.000713457
AAGTCTACAGT	0.000713338
CATTGAGGCCG	0.000713163
CAGAGGGTCTA	0.000712811
ATTAGGCGATA	0.000712345
ACACTTAGTCA	0.000711625
AACTACTATGA	0.000711355
GACGCGCAGCA	0.000710489
CGCATTAGTTA	0.000709803
CGATCTGTTAC	0.000708093
CCGGTTCAATC	0.000707388
AGATGTGCAAC	0.000706744
TCTCTAGTCAA	0.000706689
CTCTTCTTGTC	0.000705532
ATGTCAAGTTG	0.000705521
TAATCTTAGGA	0.000705194
GAACTTAATTA	0.000704544
ATAGTCGAGTA	0.000703808
AACTGCAGCCA	0.000703613
ACAGTATCTCG	0.000701525
CAACTTGCCGC	0.000701379
CCATACTTTGA	0.00070126
GCTAAGTTCTA	0.000701139
CCACGGTCTTC	0.00070063
GTTAGAGAGCA	0.000698968
CAAGTTAGTAG	0.00069769
GCACGAATGAC	0.00069762
CCGAGCAATAA	0.000696569
GATAGATCAAC	0.000696357
AGACATACTCT	0.000695599
GGAGAACAAAA	0.000694605
ATTCACGGAAG	0.000692977
AGTCCTGCTTA	0.000691336
ATAGGAAAAGA	0.000691316
ATTGTACGAAC	0.000689942
ACCAACCTACT	0.000689157
CCCTTCGGAAA	0.000687895
ATTGCCCTGGG	0.000686839
GCCTAAGTTCA	0.000686817
GGCACTGCCAC	0.000686787
AATGGGTTCCC	0.000685597
CTAACCGGATA	0.000685557
AACTTGACATA	0.000685282
GGAGGGATCGA	0.00068494
AGAAGGATAGC	0.000683186
ATAGCGTCGCG	0.000681331
GTAGGTCAGAC	0.000681186
AGTAGTGTCAG	0.000680986
CCGATGGCCCC	0.000680986
AATATCTTAGT	0.000679359
GGCATGCGACA	0.000678623
AGGTTAATAGA	0.000678353
AGCGAGTGTTA	0.000677074
CGCTTACATTC	0.000676832
GCAGACTTCTA	0.000675346
CAACACGAGGA	0.000674447
ACGACCGCCAG	0.00067424
AACACTACGAT	0.000673595
GCTAGGTGTGA	0.000672779
GATAACTATAA	0.0006717
ATAAATCGGGA	0.000671501
GAAGATTCCCA	0.000671241
ACATTTCATGA	0.000670352
CTGTTGTGTGA	0.000669208
CCTATAAGTGA	0.000667854
GGACTGTTGTA	0.000667478
GCGAATTCCAA	0.000666656
CACAGTACGAG	0.000666322
TGCCTACAGAA	0.000666299
AGCGTGGAACG	0.000665628
CTAATATGTCC	0.000665376
CCCGAAATAAC	0.000663989
AATTATGCTCG	0.000663273
TCGAGGTGCAA	0.000662881
CCCTCCCTGCA	0.000662321
ATAGATCCAAT	0.000660746
GTACATACGAA	0.000660402
ATGCATGTGGC	0.000659511
CCTGCACAAAC	0.000659032
ATTATCAACGC	0.000657902
GTCTAATTGAA	0.000657464
ATACACGCCGC	0.000657451
ACTAAGACTAC	0.000656339
ATCGGCAGAAG	0.00065496
CGTTTCTGAGA	0.000654908
TCATCGGGACA	0.000652932
AGACTGAGCAA	0.00065285
CTCAGTAATGC	0.000652825
CGAAGAGGATC	0.000652603
ATTCCCTCGGC	0.00065194
GGTGTGTGACA	0.000650809
ACTACAACACT	0.000649974
GTTTACTTAGA	0.000648589
GCGTGATAAAC	0.000648082
GTGAATAGCGA	0.00064768
AGCACCCATAA	0.000647459
CCGTGGTAACG	0.000646647
AGGGTGCATGC	0.000644334
AAATTATGCTA	0.000643439
AAAAGGACGGA	0.00064333
AGCCGCAATAC	0.000642971
GCTAACATAAA	0.000642657
TATCCAGTGCA	0.000641572
CATACTTTTAG	0.000641562
AGAATCTATAA	0.000640964
CTAGAGATGGA	0.000640549
GAAACTTGGAA	0.000639912
CACAGTACAAA	0.000639714
ATTATAAGCTA	0.000639652
CTAGTAAGAGA	0.000639535
AAAGAAACGAA	0.000639428
CGGGCTATAAA	0.000636451
CGACGCTATTC	0.000636371
TGTCAGTGGAA	0.000635225
CAGATAGGCAC	0.000634235
ATACGGGGTGA	0.000633284
AGACTGCAATA	0.000631458
ATTGCACAGTA	0.000630722
CCCACTGCTTC	0.000629511
ACATACCCATG	0.000629081
GGACTCCCCTA	0.00062857
AACTGGTGGGA	0.000625419
CACCGTAATAC	0.00062509
GGTAATCCAAA	0.00062491
ATAGCCACTAT	0.000622731
AGCTGCTAGAG	0.000621879
ATGCCGAACTG	0.00062102
ATCACATGCGC	0.000620221
GATAGGCACTA	0.000620094
AAGGTTCAGTC	0.000619026
AGCTATAAGGA	0.000618955
TATCTAGTCCA	0.000618951
GCTAATGGGAA	0.000618359
CCTGTATGTAA	0.000617625
ACTGAGCGAAA	0.000616553
AGGGAAAGAAG	0.000615758
ACCTTGACCGA	0.000615297
AGTATCTCGAA	0.000615102
CTGACTGCATA	0.000613307
GGACAAGACCA	0.000613162
CTTGCAGGGTC	0.000611905
GCAAGCGAGTA	0.000611711
CAGGGCTATCA	0.000611315
TAGCCCGGGCA	0.000609924
CTCGTGTACAA	0.000608297
AGGCTTCCACA	0.000605456
AGGATATGTCC	0.000602154
ATCTTCGTAGC	0.000601377
ACCACTCGGCA	0.000599986
AATTCGCGCTA	0.000599227
CTAGGTGTGAC	0.000598967
AGGGACATACT	0.000598494
GAGCACCTAGA	0.000598266
CAAAGTTATAC	0.000598079
ATTTGAAAGGG	0.000598035
CAATGCGCTAG	0.000598012
AATCAGAGTTA	0.000597722
AAATGAGAGCG	0.000597129
GCAGAGGACAA	0.000596333
CCAAAGATTAC	0.000596284
CCGTAATACAG	0.000595082
ACGTATTCGCA	0.000592696
TCTCAATGTAA	0.000591737
ACTACTATACA	0.000591364
AGATCTCATAG	0.000590399
GAGTAACTATA	0.000590031
CAAAAATTACG	0.000589869
CTTGCCACGTA	0.000588553
ACCAGTCGTCT	0.000585403
AAAGGTCACTC	0.000585397
AATTGGTCACT	0.000585194
ACTTCACACCC	0.000584928
ACCGTGGCGAG	0.000584918
CACTCACACAA	0.000584819
AGTGTTACTTA	0.000583942
CAGAGGTCATA	0.000582551
AAAGGCCGAGA	0.000580759
AGACAATTCGC	0.000580102
ATTCGTGCATC	0.000577748
ACGCATCTAAC	0.000576314
ATGAGTCGTTG	0.000575966
CTCTTCGTGAC	0.000575608
ATGAACGGCGG	0.000574881
TAGCGCATAAA	0.000572941
AGAACCGAATA	0.000572108
CCCCAGATCAC	0.000571352
ATTAGAATAGA	0.000571117
GTTTGTACGTA	0.000568145

## Sheet: Cefoperazone-sulbactam
Feature	Importance
ATATTCGAATC	0.00172434
AACACTGCACC	0.00166667
GAGGAAGGAGC	0.00166667
CATTGTACAGG	0.00166667
AATACAAGAAC	0.00166667
CCTACAAATCC	0.00166667
AGGTTCGGCAT	0.00166667
AAAGAGCGGGG	0.00166667
ACAAGCACAGA	0.00160096
CACCCCAGATG	0.00148027
ATAGGACGTCG	0.00142318
ACGGCACTACA	0.00139403
CGGGGGAAACA	0.00135372
AACTGCCTCCT	0.00132834
TAATCTAGTAA	0.0012964
AGTGATAGTGG	0.00125463
CGGACGCCATA	0.00124534
GACTGAGCCGC	0.00124534
CGGTACATGAC	0.00124057
CGATGTTATGA	0.00118153
AAACCGTAACG	0.00118153
AGATCCCCGAC	0.00118153
CCCCTTCCTCC	0.00116938
CGCGTCTCCAA	0.00114651
ATTCTCAGTAA	0.00114105
ACTACCGCAGC	0.00113924
TCGTCGTGGCA	0.00112776
TATGAGGTGCA	0.00112678
GATTCCTTGAC	0.00110698
ACCAAGACGTA	0.00110698
ACTGATCCGTA	0.00110698
GCTCCTCTGCC	0.00110698
CTGGTAGAGCC	0.00110698
ATGGTTCGGTC	0.00110698
CTTAGTGAAGC	0.00110285
AGGTATCTGTG	0.00110279
AGATTGCCCAC	0.00110279
CTCGATGTCTA	0.00108959
CCTCCGGTTGA	0.00107315
CTTTCGCGTCA	0.00106525
ACGGTTCAACT	0.00105667
GATCCGAGAGA	0.00105658
ATCCTGCCGTG	0.00105377
GTGATGTGCAA	0.00104454
CTACCCGACGA	0.00102992
ACACTTACTTC	0.00102992
CTGACGTCTAA	0.00102992
ACCCACTTTAG	0.00102941
GTTGGCAAAAA	0.00100201
ACATCTTCCCA	0.000997923
CGCCGTACCAA	0.000994263
CATGAGACTCG	0.000992537
GAACATCTTAC	0.000992537
GCCCATGCCAA	0.000992537
CTCATATGTCC	0.000992537
GTAGACAGCAA	0.000992537
AGCAACTACGA	0.000992537
CCCGCGTCCCA	0.000992537
AAGCCGGGAAG	0.000992537
AAGGCGGGAGT	0.000992537
ACAGAGTGAGA	0.000992537
CCGGTTAGGGA	0.000992537
CGATCTATCCC	0.000992537
AGCAAGGGCAT	0.000992537
ACAAGAGAGGT	0.000992537
AAGTATTACTA	0.000990497
CGCTCCCTCGA	0.000984906
AATACGCGACG	0.000977866
GAGTTCAGTGA	0.000977866
CTTGGTCTGCC	0.000976481
CCAGAACCGCC	0.000971722
CACACGCTATG	0.000952637
CCCCCAGTTTA	0.00094168
GTAACAAGCCA	0.00094168
CACGTGCGTGA	0.00094168
CGGGAGGCAAC	0.00094168
CGCCCCGTTAG	0.00094168
AGAGTGGGCAT	0.000939385
ACGTAAGGATG	0.000934374
GCCCAGAGCAA	0.000934374
GGCCTCGTCAA	0.000934374
CTCGCCAAACA	0.00092816
AGTCTGGAGTG	0.00092816
ACGCACGAAAA	0.000912002
AACGAGTATAC	0.000912002
ACCCGTTAGAC	0.000907294
GCCCTGAGCTA	0.000906388
ACAGACTTAGC	0.000905861
GATACTTGATC	0.000901243
GAGGATCCGAC	0.000900242
ACAGAAGTACA	0.000899008
CCAGAATGGAA	0.000898839
GACAGACGTCC	0.000891938
CGCTGTTTCGA	0.00087555
CTCCGTGGTGC	0.00087555
ATTTCGCGTCA	0.00087555
CCAGTTTGAGC	0.00087555
GCCGCTCCGTA	0.00087555
CGTTTCTACCA	0.000873325
CCTCTCGGCCA	0.000861762
AGGCGAGTGGA	0.000857934
TGACGGAACAA	0.000852201
CCGGCACTAGA	0.000848998
CATAAGACCGG	0.00084269
ACGATCTGGCT	0.000842662
AGGAATTTGGC	0.000842662
ATGGCTCGGCA	0.000842662
CCGGCTGATTA	0.000836615
CTCACTGACGA	0.000836615
AACGACGTATG	0.000836615
ATGTGACAACG	0.000836615
GCGATTAATCC	0.000836408
CGGTTCTTGGA	0.000836254
CCAGTTGATCA	0.000833299
ACAACGTCTAT	0.000832398
GTCATTATAAA	0.000832398
CAGATCAAGTA	0.000830247
CGCCGGGCCTA	0.000830247
ACAAAGCAATA	0.000830247
AGGCACCCTAA	0.000830247
CGGAGTGCCAC	0.000828529
ATTGAGGCGAA	0.000828213
AGTGGAGATCA	0.000827137
GCCCAACATCC	0.000827137
CAGCGAGGCTC	0.000827137
CTACACGGAAC	0.000827137
CAACCGACCGA	0.000827137
GTATCCGACGA	0.000827137
GCTCCTCGAGC	0.000827137
GAGTGTCTACC	0.000827137
GCTTCTCTCGA	0.000827137
AAGTGCCTGTG	0.000827137
CCATAGGGAAA	0.000827137
CCTCTGACGCA	0.000827137
CAGAAGTGTAG	0.000827137
CCTGACCTTGC	0.000827137
AGATACAGTAC	0.000824005
CCGGGATAAAA	0.000824005
AGGGGGATTAT	0.000824005
ACTGACACTCT	0.000824005
AGCGGGAGCTC	0.000824005
ATCGTTCGACC	0.000824005
AGGCAAGGAGC	0.000824005
CGAGACCTTAG	0.000824005
CGTACTTAGAC	0.000824005
ACGTACCAAGG	0.000824005
CTGCGACTTGC	0.000824005
CGAGGGTGCCC	0.000824005
CTGAAGGGCGA	0.000823398
TACTCCTTGAA	0.000823204
CTTTGGCTTAC	0.000820849
CAGCGCATGCC	0.000820849
CTAGTGGTCTA	0.000820849
GAGACTGCTAC	0.000820849
AATATACGGGA	0.000820849
TCTGATCCCCA	0.000820849
ACGTGAATCAA	0.000820849
ACGCGGACTTC	0.000820849
ACCACACGGGC	0.000820849
CGGGGATTTAG	0.000820849
AATCCGCTCCG	0.000820849
ACCCCCACGAT	0.000820849
CCGCTGCCTAA	0.000820849
GGGCCGGCTTA	0.000817669
GCGAGCTGTGA	0.000817669
TCGTTTGTCCA	0.000816634
GCAGTCATCCC	0.000814695
CTGTGTATTGC	0.000814465
CCGCTACCTTA	0.000814465
ATCGAGATGCA	0.00081162
ATATCTTCAGA	0.000811262
ACTGGTAGCCC	0.000811237
GCGGATACATA	0.000803845
CACTGCGACCA	0.000802535
AGGTTCGCACT	0.000798948
CTCTGCTCAAG	0.000795948
GCGTCCGGGTA	0.000792954
CAAGGAAGCAC	0.000792954
CCCCGGGCCAG	0.000786399
CTGGCTCAGGA	0.000779168
AAATGCCGTCG	0.000769568
AATCGGTCGCT	0.000758042
GGTCCTTTCCA	0.000757661
TGGGCAGAAAA	0.000756364
ACATAGGCTCC	0.000754664
GCTACGGACAA	0.000753537
AGCCAGCTTCA	0.000752736
TGCTTATGACA	0.000752424
GGACTCCGGCC	0.000752424
AGATGCCATAG	0.000752424
TCTCTGTTCCA	0.000752026
ATCGGAGACGA	0.000746655
AGTGAGGGATG	0.000746184
GGTTACATCCA	0.000746184
GGACCCTTAAA	0.000746184
CTCGAAATAGA	0.000746184
TCACATCTACA	0.000746184
AAGACACCAGC	0.000743437
AGTTCTCAGAC	0.000740488
CATTGCAGGAG	0.000740488
ACCTGAGTCAT	0.000740488
GCTTAACCTCC	0.000740488
CCTGGACGCCG	0.000740078
ACGAATGAGGG	0.000737857
GCTAATCGTGA	0.000737857
AACAATGGAGA	0.000737857
CGGGTGGTGAG	0.000737857
GATAGGTCGAA	0.000737857
AGCGGGACTAG	0.000736013
AACGGAGAAAC	0.000736013
GATCGCCGCTA	0.000735206
AGTGACGTCCC	0.000733225
AACCGATCCAA	0.000732472
ATGTACGAGCA	0.000732472
TGATCAAGACA	0.000732472
AGCCTTAGAGG	0.000732472
ACTTTGCGGTG	0.000731444
CGTTCCCGGTA	0.000727855
ACCTGGCGAAT	0.000727652
AGGAGTTAGCC	0.000726869
CATGGGTACGG	0.000726869
ACCCAGTCCTC	0.000726869
CCCTATGTTAC	0.000726869
TATGACCTCCA	0.000726869
TTCCCCCGGAA	0.000726869
GATTCGCGCTA	0.000726869
TAGACAGTCGA	0.000726869
CAACGCCGTAG	0.000726869
GACGTGGGATA	0.000726869
AGACACGGTTG	0.000726869
AGGAGATCGAT	0.000726869
TCCCACAGGAA	0.000726869
ACTCCCGCGAC	0.000726869
CAGGAATGAAG	0.000726869
ACAAGTGCGAC	0.000724987
GCGTCGGATCC	0.000724987
ACGTCAGCGAT	0.000724987
ACTATTGCATA	0.000724064
ATCCACTGACA	0.000724064
CATGTGAGGTA	0.000724064
ATGGTCGGAAG	0.000724064
CAGGTCAGCCA	0.000723302
AGGCGGTAACA	0.000723302
TAGTCGCCCAA	0.000723302
ATGGCGGGCTC	0.000723302
AACGGTTCGAT	0.00072308
AGCCCTGCTTA	0.000719596
CTCTGGCGTGC	0.000719596
ATAACTGATGG	0.000719329
AGTTAGCTCCA	0.000715107
AAGCCCCGGCA	0.000712858
GGCGTAGCGCA	0.000710168
CAACCGACATG	0.000704848
ACCTGAATGTC	0.000703625
TCGGCCGTGCA	0.000703625
GGAATCCAGCC	0.000703625
AGCCTAGTCAC	0.000703625
AAGGAAAACAC	0.000703625
ACAGTGAACCC	0.000703625
GCGGTTACGAC	0.000703625
AACCTACTGGG	0.000703625
CCCGGTTCCAA	0.000703625
CCCTATACCTA	0.000703625
AATTCCGGACC	0.000703625
CCCGCGGTAGG	0.000703625
GCCAGGTATAC	0.000703625
AGGGCGTGTGG	0.000703625
ACCGAAGGAGC	0.000703625
AATGGGCTTAT	0.000703625
AACGGGCGACT	0.000703625
CGCAAGCAAAC	0.000703625
CACGACCCCCA	0.000703625
CTAGACCTATC	0.000703625
CACTCTCTACC	0.000694263
GGTTCTGAGTA	0.000692722
ACACCGTTCGA	0.000689977
GAAATCTGCCC	0.000685405
ACCATCAGATG	0.000684925
ACTTCTCCTGC	0.000681761
GACGCAAGCTA	0.000681761
ACAATGTATGC	0.000680973
GGTGCCACAAC	0.000679198
ACACTTAACCG	0.000676823
CGGTATTATAG	0.000676823
ACTGTCGATCA	0.000676654
AAAGGGCGAGG	0.00067617
CCGAGATGACG	0.00067617
GGTATTGAACC	0.00067617
AGGCTTATAAT	0.00067617
AAATACTTCGC	0.00067617
ATGTCGGTCCC	0.00067617
CTGCTGAATGC	0.000674129
AAAGGATCTTG	0.00067352
CCAAAATTGGG	0.00067352
GCCCTTATTCC	0.000673183
CTAATATAGTA	0.000672403
CGCATGAGCCC	0.000669108
ACCTTTCTCCC	0.000669108
ACTAACAACAG	0.00066907
ATCACAGTGGG	0.00066907
CGGTTAGCTCC	0.00066907
CGGTTGCATTA	0.00066907
CGGCTGATGGA	0.00066895
AGTGGAGGTAT	0.000668861
ACAAAAACTCC	0.000666373
ATAGATGGTGG	0.000664142
AGCTTGCCATA	0.000659232
CTCTCTCTGCC	0.000659232
AACCTCCACGT	0.000659232
AGGAAATACAT	0.000659232
CAGCTCACATG	0.000659232
GCGATATACCC	0.000659232
CCTATCCCGTC	0.000659232
CGAATCTCGCG	0.000659232
TCCCCGCCACA	0.000659232
AAGGTGCCCTC	0.000659232
GGACTCAATCA	0.000659232
AACAACGCGGA	0.000659232
GCAGAAGTAGA	0.000659232
CTCACCTGGAG	0.000659232
AAATGTGCTGA	0.000659232
ACGGTGGTACA	0.000659232
CACGCACGAAA	0.000659232
TAGTTGTAATA	0.000659232
ACGTATCGTCG	0.000657858
AGCGTTACTAA	0.000656731
ATGAAATTCTC	0.000655163
ATCCCCGGGCC	0.000655163
AACACGCTTTC	0.000653287
TCCGATAAGGA	0.000651756
AGGCAGGCTCG	0.000651685
ACGTAGGAACT	0.000651685
AGTCGGTCTCA	0.000651685
GCCCTTATACA	0.000651685
CACGGTTAGGG	0.000651685
AACAGAGGAAA	0.000651685
CATTGGGATTC	0.000649161
CATGCTGCATC	0.000649161
AAATCGACACC	0.000649161
AGGAAACAGTC	0.000649161
ACAGCTTAAGT	0.000649161
AGGGGTGAAAC	0.000648946
CTTTTGTTGAC	0.000648327
CGAACATGATA	0.000645884
GACGCAATGAC	0.000645884
GACCTGTATAC	0.000639217
CATGAGTGATC	0.000639151
AGCCAAAGACT	0.000638921
GAGGTCTACTA	0.000638488
CGTTTATTCAG	0.000638452
CTCGCTCCAAC	0.000638452
AAGAATCCTAG	0.000638452
ACAGGAAACCT	0.000636748
AACGTACTACC	0.000636748
ACTACATTTCA	0.000636748
CCACGTCGTAG	0.000634363
ACAATAGTAAC	0.000634363
ACTGGACTTCC	0.000634363
GTGCCTCCATA	0.000633579
ATTGAAAATCG	0.00063196
CGCCCAAGCCA	0.00063126
AATGGATTCCT	0.000629647
GAACCGTGTAC	0.000627494
GGGCCAGCTCA	0.000627494
TATACTCAGGA	0.000627494
CACCGGAGAGG	0.000625685
CGGGATCAGTA	0.000624074
AGTCGTTACAT	0.000622988
CTCACTCCCGA	0.000622546
GCAGTTCCCCA	0.000621747
ACGCCACTTCT	0.000621387
ATTCACTGACG	0.000620266
CATGCCGCACG	0.000619783
GCAAGATCACC	0.000616348
CATGTTGCTAC	0.000615864
ATCAAGATGGC	0.000615864
GGAAACTTTGA	0.000615864
AATAAGTACCA	0.000615864
AATACGACAAA	0.000615864
AATGACTCGTA	0.000615864
ATTGTAGATTC	0.000615864
CTAGCTCGGAG	0.000615864
AGCATCAAACG	0.000615864
AGCAGGGTTTC	0.000615688
AGAGGTTGTGG	0.000613344
CGGACTTATAA	0.000613344
CTCACAACCTA	0.000613344
CAAGGCTATAA	0.00061334
ATTCGCGCACA	0.00061334
AGAATAGCGAA	0.00061334
GCCACTTCTTA	0.00061334
CGAAAGGTCCG	0.00061334
GGGTAGCGCTA	0.00061334
AGATCAAGACG	0.00061334
CATTGCTCCGC	0.00061334
AAGGGCAAAAT	0.00061334
CTAAACTGCAG	0.00061334
ACAGTGACCGG	0.00061334
CCATAAGGTCC	0.00061334
GACAGTGACGC	0.00061334
ACAAGATGGAG	0.00061334
ACCCTTCTGGA	0.00061334
ACTACTAACGC	0.00061334
GAGTGATCCTA	0.00061334
CGGACTAGTTC	0.00061334
TAATCTAGCCA	0.00061334
ATTAACAAACA	0.000612739
CAACATTCCCC	0.000611021
CAGGCCTATGA	0.000611021
CCCTTGCTCAG	0.000611021
ACCCAACGACA	0.00061099
ACGGCAACTAC	0.00061099
GTCCGAACGAA	0.000608964
AGAGAAACTAT	0.000608478
AAGAGTGGGCA	0.000607573
CATGGTCTAGA	0.000604156
CGAAGCACGCC	0.000598511
AATTGTAGTCT	0.000594472
CCACGCGTGAG	0.000593322
AACAGTCCAGG	0.000590171
AGGTGTACTGA	0.000590171
AGAATTGTCCT	0.000590171
AGAGGGGGCCA	0.000590171
ACTCCTTGTCA	0.000590171
ACCAGATCGCT	0.000589374
ATATTATAACG	0.000589056
AACGCACGGTC	0.00058658
CTCTCAAATGC	0.000585465
ATATCCAGTTA	0.000585465
GGCGGTGTCTA	0.000585465
CGAACTTAATC	0.00058217
CGCTTTGCATC	0.00058217
TAAGGCGCTAA	0.00058217
AATACACCTCG	0.00058217
TCCAATCGAGA	0.000577078
CGAGTTCGCAA	0.000576258
GTCTACGTCAA	0.000576258
TATGAAATAGA	0.000576258
GTGTCCTCAAA	0.000576067
TCACCCACCGA	0.000575566
GACTCATAATC	0.000575389
CCTCCTCTTGC	0.000573699
CGAGTAAATTA	0.000573699
GTCCGAGTGAA	0.000572455
AGTGCGCGTGC	0.000572455
ATGTCATTCTG	0.00057146
AGTTGGCCGCA	0.000570575
AAAGTTCGTAT	0.000570575
AAGTGAACTAT	0.000570575
TGTGACTCCAA	0.000570575
GTTACACCACA	0.000570575
TAACGCGAGGA	0.000568134
ACTCAATGGCT	0.000568109
GGCGTTCCGGA	0.000565998
CCCCTATTACG	0.000564019
GAATGGAGTCA	0.000563879
ACCTCTCCAGC	0.000563862
TAGGTATGGGA	0.000563818
TCTTGGACACA	0.00056187
TCGACTTAAGA	0.000561774
CCAAATCGTCC	0.000561774
CTCATGGCCAA	0.000559813
CCGCCGTGCGA	0.000559686
ACGAACCTATA	0.000559686
CGTCTTAACGC	0.000559686
GGCCCGTTTGA	0.000559686
AACCTCTTAGC	0.000559686
AAGGCTGGTGG	0.000559686
CCAGAATGACA	0.000559678
ATCGGTGTAAG	0.000559678
GCAAGGCAACC	0.000559663
CACGCAATGCA	0.000559646
CAACTGCTGCG	0.000559607
GACTACATTAA	0.000559599
TCAACCGGGGA	0.00055959
ACATCCACAAT	0.000559567
AAAGGTCGGTG	0.000559567
GTGGCTGTAGA	0.000559517
AGCCGTTCAGG	0.000558677
GCCGCACGTCC	0.000555707
AAGTGTGTTCC	0.00055554
CCATGTTTTCC	0.00055554
AAGCTGGCCAA	0.00055554
CGTTGACGACC	0.00055554
AGCTACCATGA	0.00055554
ACCTAGTCTCT	0.000555494
GGATCATCGCC	0.000555494
CCGATTCACTC	0.000555494
ACCTTGCGCAC	0.000555494
GGCAAACGTCA	0.000555494
GCTGAAACAAC	0.000555494
ACATCCCTTCG	0.000555415
CCCCAGCCAGC	0.000554841
CATCTGCGGAG	0.000553867
AATTATAAGTG	0.000553104
CATCGGTAACA	0.000552984
CGATGTGGTAG	0.000552984
GGCAGGAACAA	0.000552984
AAATAGGTGTA	0.000552984
ACTCGTGCGAT	0.000552739

## Sheet: Piperacillin-tazobactam
Feature	Importance
GATTACACGAC	0.00193173
ATAGGAGCGGC	0.00190664
ATCTTATCTTA	0.00190455
ACGCATCGTAG	0.00186949
CCACGTCATGC	0.00186395
ATAATCGTTTG	0.00179475
GCCGATTGCGA	0.00178091
ATCATGCGCTG	0.00176686
GCTTAACCCCC	0.00174761
AGAGGCTGGCA	0.00173567
AGGGTGCGCAC	0.00173422
ACCCCTCAGCG	0.0016615
AGTATACAATA	0.00157215
AACCAGTACTC	0.00152512
AGACTGGGACT	0.00142305
CAGTACCAAGC	0.00140559
CTAGGAGAAGC	0.00118934
TAGACGAGTGA	0.00118871
ATATCACCCCA	0.00116448
AGCTAACACCG	0.0011481
CGTAATGTACA	0.00114351
CTACAGAACGC	0.00114159
GACGTGCCGCC	0.00113721
ACGGGCTCTGA	0.00113688
GTGCCTACTGA	0.00112732
AGGTCTTCCAG	0.00112653
AGGACGTGCCG	0.00111657
AGAATCCTCAC	0.00111628
ATGGGTGGCAC	0.00111505
ACAGTGTGACA	0.0011037
AGCCCAATTGC	0.00110256
AACATGTAAGG	0.00110208
GCACTTTCGAC	0.00110096
CGAGCTAATTC	0.00109914
CGGAGGCTGGA	0.00109605
CGCGCTTGACA	0.00108964
GCTCGCTTCAC	0.00108677
GACGCAGCCGA	0.00108676
TTCGATTACAA	0.0010856
AACGAACCTGA	0.00108465
AGTTTGTCTAC	0.00108258
CAGGTGCCGGC	0.00108133
GATAAAAGTCC	0.00108008
CATTGTAACGA	0.00107972
ACAATGACCGC	0.00107914
TCTTCCCCACA	0.00107385
GCGAGATCACA	0.00106713
CACATGACGCA	0.00106404
TACAGACCGCA	0.0010611
CGGACAGGACG	0.00106005
TGACACCCCCA	0.00105967
CAGTAGGAACC	0.00105873
GCCCCTAGAGA	0.00105668
ACTGTCAGATC	0.00105489
CGCTAGCAATC	0.00105404
ATATGATCTAG	0.00105397
GAGAAGCGCAA	0.00104897
ATAGAGGTGGA	0.00104808
CTCCTTTATCC	0.00104806
ACCCCATTGTA	0.00104801
AATGGTGGAAG	0.001048
AGACATGACAC	0.00104779
CGGACAGATCA	0.00104603
ATCCAGTGTGC	0.00104546
ACACGAGCAGG	0.00104506
AGTAGTCGGTA	0.00104327
ATTAGGGCAAC	0.00103959
AACGGCTACAT	0.00103844
GGGGGTGCGGA	0.00103775
TAGTATCATCA	0.0010376
ATCGACGTATG	0.00103574
GAGTCCTCACC	0.00103512
ACCCTGATAGG	0.00103459
CCCAAAGATCG	0.00103459
CAATCCTAGCC	0.00103365
ATACGACCTTC	0.00103365
CTAACGACGAA	0.00103295
ATTCTGTATCC	0.00103124
AGCGGTCTAGG	0.00103094
CCTATGGTCGC	0.00102919
CTCCAACTGGC	0.0010271
CTTGGCGATAA	0.0010255
CACACAGGTGG	0.00102495
CGGCTCACCCA	0.00102391
CTGGGGTTGTC	0.00102091
CATACTATCAG	0.00102033
TCTGGCCTGCA	0.00102033
CACCAGTTGAC	0.0010199
AAGCGAATCCA	0.0010181
AACACTCTAGT	0.0010168
AGTGCAGATAC	0.00101658
AGGAACTCGAC	0.00101604
CAAGACACCGC	0.001016
AGCCTCCGAAC	0.00101583
GAGTGACAACC	0.00101583
AATAGAGGTTA	0.00101156
AGGCAGAACCC	0.00101092
TGTCCGTCTAA	0.00100826
CCAGGGTGTAA	0.00100755
CACCTTCCCTC	0.00100729
CAGTCTATTCA	0.00100615
GCTATTCAGGA	0.00100556
TCGTCTTCCAA	0.00100444
AGACAGAGACA	0.00100432
ATGGCGTAAGG	0.00100389
TCACTCCACGA	0.00100292
CTCCTTGGAAC	0.00100251
ATCCACCTAGC	0.000999894
CTACCTCAGTA	0.000997432
AGGCTCCGGTC	0.000997365
GCAGCCTGACC	0.000996849
ACCATACTGTG	0.000996232
ATTTATCGCTG	0.000995913
GCTAATTGGGA	0.000994075
ACGGTAACATG	0.000993378
AATCTCCCTAA	0.000992431
TAACCGCGGGA	0.000989735
AGATGTCGACG	0.000989241
GGGAATGACAA	0.000988459
AGGATCCGGTC	0.00098733
CCGGGACGAGC	0.00098733
AAGCCACCGAC	0.000987293
AGTAGCCATCA	0.000987229
AAAGGAGCTCA	0.000985884
CTCGACTAATA	0.000984923
TACACAGGAGA	0.00098457
AGGAACAACAG	0.000984188
CTCCGCATATA	0.000983297
CGCGATCCAAC	0.000983203
AGAAACGACCT	0.000982374
GTGCGGTACTA	0.000982056
AACGTGCAGAC	0.00098131
TAGCCCACCCA	0.000980065
CAATGCGATGC	0.000977998
CTATAGTCGGA	0.000977955
CTATCTTAGGC	0.000977648
CTACCGATAGC	0.000976924
CCGCAGAATCG	0.000975517
ACGGCAAGTTA	0.000975389
CGTACTGGCGC	0.00097438
ATTAGCCATCC	0.000972403
CCCGGCTGTCG	0.00097119
CAAAGTGTCAG	0.000971124
CAGTGCCATCC	0.00097097
GCGTTAGGCAC	0.000969758
CCAACATCCAG	0.000968943
CGCAGGATTAG	0.000968837
CACCCAGACAC	0.000968058
ACATTTAGTGC	0.000966451
CAAATACCCTC	0.000966265
CACAATCAATA	0.000966265
AAGGCTAAGTC	0.000965759
GTTACCAATCA	0.000965161
AAACTCGCATG	0.000964999
GATACATAGTA	0.000963178
CAAGGTCTGTA	0.000963125
AGTCACCGTAA	0.000962971
AAGCCGTGTGG	0.00096283
CCAGCATGTAC	0.000961755
AAAGTTGCCCC	0.000961755
GACAAGACGAA	0.000961528
GGAAGATCGGA	0.000961038
CAAATAGTCGG	0.000959588
ATCGAAGGAAA	0.000959255
CGTGCTGGTAG	0.000957974
ATAGGCGAGAT	0.000957732
CCCCAGTAGAC	0.000956269
CCCTAGACGAG	0.000955762
ACTAGAGCTAT	0.000955652
CCATGTGTCAC	0.000955412
CTCTATGCGCC	0.000955412
GTCCGGCAGAA	0.000955319
AGCCCGCAAAC	0.000955207
AGTGCTTTGCG	0.000953856
CAACCAGGCAC	0.000951225
ACATCCTAGCA	0.000949825
ACCTCCCTAAC	0.000949598
CACTCGTCTAG	0.000949598
ATGATGGGACA	0.000949184
AGTTATCGCGA	0.000949184
TAAAGTGTGCA	0.000947663
GCAACATCGGA	0.000947571
GGTGGACCCAA	0.000946837
AAGAATGTCGA	0.00094481
CTTGATCGGAA	0.000943902
GACCACGTGTA	0.000943902
ATAGGTCGGAT	0.000943439
AGCATGAGGGA	0.000943347
CTCAAAGGAAC	0.000943236
CTAACGGGTGC	0.000943153
CAGTCCATCAA	0.00094195
GCGATATCAGC	0.000941914
CTTCGCAGCGA	0.00094186
GTATACGAGAC	0.000941439
ATAGCATCTCG	0.000940878
ATAAAGGCGGA	0.000940806
AATCGCTACAG	0.000939706
CCTGGATGTCC	0.000939704
CGAGAACAAAC	0.000936821
CAAAGTGCCTA	0.000935731
GTTGTACCGGA	0.000934964
GGCGTGCTCGA	0.000934285
CCAGAGGGGCG	0.00093414
CGTCATGCTCA	0.000933332
ACCGGAGTACT	0.000933245
GACAAGACTTA	0.000933245
ACTGTCACTTA	0.000933084
CAGACCTGGAC	0.00093301
GATGGCACTGC	0.000932632
GGGGAGAGCCA	0.000932583
GAAACGGGCAC	0.000932334
AACTCGACAGG	0.000932295
ATACCTTTCTC	0.000931412
ACCGGCTCCGG	0.000930706
GCACTCCTACA	0.000930177
CACTAGCCAAG	0.000929489
CCATCCTTTGA	0.000929489
ACTAAGTCATC	0.000929197
CAACGGCTGAC	0.000928768
GGGAATCGGAA	0.000928485
CCCACGAGAGA	0.000927703
ACATCCCCAGA	0.000926981
CCTACCCTTAG	0.000926396
CCGCTAGTTGC	0.000925904
CCAGAGGAGTC	0.000925575
ACTGAGTGGAA	0.000925328
CCTGGACCATC	0.000923529
CCTTTAAGCCA	0.000923529
GCGTCCTTTGA	0.000923003
CCTATGTAACA	0.000922345
CTCGTCGGGCA	0.000922298
GGGTTTCCCAA	0.000922066
AAGGTGCCTAG	0.000921719
TCATATCCTCA	0.000921672
AATCTAGGCAT	0.000920524
ATGAATCGTGG	0.000919952
AGAATCGGAGG	0.000919328
AAACCATCGCC	0.000919008
ATAGACCCCAC	0.000918154
ACAGGACTTAA	0.000918106
CATCAAATGAC	0.000917918
CTGAAACATCC	0.00091777
CTGAGGAGAAA	0.000917559
AGCCATAGCGA	0.000917311
CGACAAGGGAA	0.000917311
AGCATTCTAAC	0.000916707
AGAACACTCCT	0.000916494
GGTGATCGCCA	0.000915722
GAGCCTGATGA	0.000915304
CCGTGCTGGAG	0.000914418
ATTAAAGTTCG	0.000914231
GCGCCTAGGAA	0.000913595
CTTCATACCTC	0.00091206
CAGCCAAGCTA	0.000911205
ATCTACCATTC	0.000911058
ATGGACCCACC	0.000910278
AATATAGCACT	0.000909959
AAAGTAGTCAG	0.000909954
CAATCTGAGGC	0.000909954
ACGGGGGAAGA	0.000908903
CAGAAGATCCA	0.000908903
CACGCTACGTA	0.000908739
AGGATTCTGCC	0.000908334
CACTTGATGGG	0.000907428
CATCAGCCTGC	0.000906641
ACTCACAGTTC	0.000906438
AATTGCGGCAG	0.000905005
CCTGGACAGAC	0.000904026
GGAGTCCCTCA	0.000903357
CTCCGCGGACA	0.000902905
GGGTCTTACAA	0.000902153
CCCCGAAGGGG	0.000901678
AGGCCTTGGAT	0.000900198
AAGGTCCTTGG	0.000898826
GAAGTGACCGC	0.00089879
CAGGCCGTGAC	0.000898762
GGTCAGGTCAC	0.000898355
CAATGATAAGG	0.000898173
CTCGAATCACA	0.000897712
GATAAGTGTAC	0.000896351
GCGCGGGGACA	0.000895543
CTGTTGCATGA	0.000895156
AAACACTAGCC	0.00089508
AGCATTAAGCG	0.00089508
CCCCAGGGGTA	0.000894456
AGACTGGAGGA	0.000891548
GGCAGAACGCC	0.000891183
CCCATACCCTC	0.000890308
GCCTCGACAAC	0.000889593
CCCGAAGAAAC	0.000889593
AGTTTAACGGC	0.000889593
AGAGTCACCTA	0.000889459
AGCATAGACAT	0.00088888
ATACTTGGCGC	0.00088843
CGGCGAATACG	0.000887985
CGGGGATGTTC	0.000887864
ATGAGGCACGA	0.000887493
ACAAGCTCCCC	0.000887386
GGTGATTGCGA	0.000886749
GTACCCTTGGA	0.000885954
GATACTATGCC	0.00088586
TAGGGGTGGGA	0.000885213
ACCACCCCGAA	0.000885177
CAAGTCTGTGA	0.000884666
GGCCCACCGCA	0.000884635
AAAGTCTACAG	0.00088459
ACACAGCGCCA	0.000884298
ATCTTCTCTCA	0.000883574
ACCCTAGACGA	0.000883574
CACTCGACTCG	0.000883275
ATCGTCATACC	0.000883199
ACTGTTGTATA	0.000882654
CTTCTGGCTAA	0.000882318
ACGTCTGGCGC	0.000881843
AACCTAGGACA	0.000881675
ACGGTCGCCTC	0.000881225
AACCACTAGTG	0.000881099
ACCTCGCGCAT	0.000880726
GCTCAAGCCCA	0.000879481
GTGACCGGACA	0.000879481
AGAGGGTATCA	0.000878609
GCTGAGTACAC	0.000877943
CCGCCTTCGCG	0.000876838
TAGACATAGCA	0.000875921
AACAGGACTTC	0.000875921
CTGTGTTGCGC	0.000874638
AGTCCACCAGA	0.00087435
TCACCACGCGA	0.000873985
AATGGGGGCGG	0.000873539
TACATGGCGGA	0.000873294
CAGACGATGCC	0.000872593
ATCGAATTGCC	0.000872165
ATCTAGCTTGC	0.000871198
AGGACGCTAAA	0.00087049
AGTGATGGCGG	0.000869795
AGGGCACTTAC	0.000869565
ACAGGGACAAA	0.000869565
AGGCCAACGAC	0.000869072
CGGTGACAGAG	0.000868815
CACGTGAACGG	0.000867885
CACGCTGCCGA	0.000867885
CCTTGTGTTCC	0.000867459
CGGCCCCCCCC	0.000867094
CGACCGTGACC	0.000866657
CGCTAAATTGA	0.000866094
ACCACATTACA	0.000864988
GGGATCTGCCA	0.000864795
AGAGAGCCCGG	0.00086443
CCGATAGAACG	0.000863835
CTGCCTCCATA	0.00086185
AGGCGCCTTAT	0.00086185
CCGGCGCAAAC	0.000860267
CCACCGTGCGA	0.000860149
TGCTGTATGAA	0.000859275
AAGCGCTAAAT	0.000858434
AGACGTCCACG	0.000858023
GTACTAGTCGA	0.000857788
AACCTTTCATC	0.000857553
AGGCTGCCTCC	0.000857046
GCGTCCACCAC	0.000856687
CATGCAGCTCG	0.000855964
CCGGTGTCGTA	0.000855435
CAACCCCACCC	0.000855388
ATACTATGACA	0.000854945
AATGAATTCGA	0.000854839
ACTGAACGCAG	0.000854805
CATGTCCGGAG	0.000854771
AAACTGGGGGA	0.000853905
CGGTTCTAATC	0.000853078
ATCGCCCGCTA	0.000851787
GGACTCTTCTA	0.000851423
CGTTTCTCCTC	0.000850795
AGAAAAGTGCG	0.000850726
ATGACGCGAAG	0.000848917
AACTGGCCGAG	0.000848818
CGCTACAACTA	0.000848702
ACCCGTTGACA	0.000848627
TGCGGAGACAA	0.000847724
CCACCACAACA	0.000846578
CCGGTACAACA	0.000846567
AGCTCGGCGGC	0.00084606
GACTGGCGACA	0.000845746
CAGTCCTAACA	0.000845528
AATTACTGACC	0.000844866
ACTATCTCCAA	0.00084479
GGATCTAAACA	0.000844518
TCCGATTCCCA	0.000844279
GCTAGTCATAC	0.000844074
CAAACTGAGGG	0.000843488
CCCAGCTAACC	0.000842077
CACCCTCCTGG	0.000840649
ACCCAGCGGTA	0.000840361
AGGAGATTCTA	0.000840053
CAAGGGGTTCA	0.000838572
AGGTTAGTGCA	0.000838205
CGAAACCATCA	0.000837977
GCCCTTATCCC	0.00083744
AATTCCTTAGG	0.000837112
AGTATGTAGAT	0.000836777
CGTAGAGATCA	0.000836561
AGTCGTGGTTG	0.000836528
CGTTTACGACA	0.000836321
GATGGTACACA	0.000835949
TATAGAACACA	0.00083544
CGATGTACAAG	0.000835401
CTATCAGCAGA	0.000834754
ACCACTCGACT	0.000834207
CAAGTCCTCCC	0.000834207
GCGCACAAGTA	0.000834207
CCGAGCGCACG	0.000833897
ACGGTCTGGGA	0.000832546
CCCTAGTGTGC	0.000831628
AGGAAGCCTCC	0.000831031
CCTGATGCTCG	0.00082955
ATGGCGAAATA	0.000828997
CGGAACCACGA	0.000828483
CGAACATCTAG	0.000827865
ATGTTAAGTGC	0.000827602
GTGGATAATCA	0.000827554
GACGACTCTAA	0.000826482
CCATAAGTGAC	0.000826125
AAAGAGTCACG	0.00082532
AGATGACTTAT	0.000825162
CCCGACGGCAC	0.000824354
GCGATCCCAAC	0.000824152
CTTCGTTATGA	0.000824045
AACACCGAACG	0.00082257
CGGTCTAGTGC	0.00082257
CAGCGCAATGC	0.000822079
CTCTGGAATGC	0.000822002
AGCGGAATCAA	0.00082197
CAAAGGTCCGA	0.000820126
AGTTAATTACC	0.00081952
GAGCATGGCGC	0.000819281
GGCTAAGCGAC	0.000819044
ATCCGGCAATA	0.000819044
TGAGAAGCCCA	0.000817217
ATTAGTGGAAA	0.000816185
CTTTGTGCTGC	0.000816147
AATGGGTGGGG	0.000814847
GGCTACACTAA	0.000814757
ATGCTAGGATG	0.000814532
ACCAGCTATCG	0.000814532
ATCTCACAACC	0.00081377
CGCGCGGCGAC	0.000813559
CATAGAGACAG	0.000813559
CAACCGACATG	0.00081304
AAACCAGGGCA	0.000813033
CGGAGCTATCC	0.000812534
ATTCCCTGGGC	0.000812461
ATACTAGTACC	0.000812306
CCAAGGGTCAC	0.00081114
CCCCTGTTAGA	0.00081114
AATGTCTAGGT	0.000810569
CAGTAGATAGG	0.000810286
ATCCTTTGATG	0.000808951
TACGCTGGGAA	0.00080785
CATAACTTCAC	0.000807266
CGTTAAGTAAC	0.000805405
AGGAGATAACT	0.000805405
AATCGAACTAC	0.000805367
AACGTCACTTC	0.000804833
GAACCTTTCAA	0.000804739
ACAACCAGGCA	0.000803512
CTGCACAGCGA	0.000803218
ATAGTTGCTCA	0.000803163
ACTTCGGTTGA	0.000803163
CAGACACGGGA	0.000802891
GTATGCGAGAA	0.000802116
AGGAGTGTGCG	0.000801315
GCGCATCGACA	0.000800737
CGAGCGGGAGA	0.000800553
GCTGAGCTCAC	0.000800523
ATGTCAATGTG	0.000799113
ACACATGTAAT	0.000799049
AGTGGGATGGA	0.000798103
GAGTGACACTA	0.000797492
GCTCTGTACAC	0.000796591
GACCTCCCTCA	0.000796413
AGATATTCTCC	0.000795873
CCCGACCAACC	0.000795535
AAACCCGATAG	0.000795535
CCCTGTTACCG	0.000793964
ACCCATATGAT	0.000792344
CCTAAGGCTAG	0.000792079
GCCCCCGAAAC	0.000791094
CAACCGTATAC	0.000789254
AGTGACCCTCC	0.000787958
CATACCATGGA	0.000786617
CGGAGCTCCAC	0.000786343
ACCCCGAAAGG	0.000785401
TCTCAATGACA	0.000783945
GTAGGATTAAC	0.000783103
AAAAGGTGTCA	0.000780896
CCGATTGTGCC	0.00078081
ATATGCGGCGA	0.000780798
ATACTAGTCAT	0.000780119
AACTACTAGTG	0.000780102
AGCTCGAAAGC	0.00077942
ATATACACGCA	0.000779382

## Sheet: Amikacin
Feature	Importance
CTACACGGGGC	0.00206822
CCGGCCAATCG	0.00173295
CGGCAAGGAGA	0.00170743
CCTAACCTGCA	0.00168169
CCGAGACCGCC	0.00159616
AGAGTGTCACG	0.001565
ACGATGAGCCG	0.00153594
ATGGCGGTCTC	0.00151973
CCGTCTCCAGG	0.00150743
GGTCTCGGCTA	0.00150009
GCTATTTGTCC	0.00149043
AATTGACTCTC	0.00148303
GGAAGGTGCGA	0.0014658
GGCAGGGCGAA	0.00144815
GTTAAGGGCCA	0.00143952
CACGGTGCCGC	0.00143284
AGACCGGGCAA	0.00142592
CGGGCGATGCC	0.00141746
CCGCATCTAGC	0.00140213
ACCCAGGCCAT	0.0013866
GCCTTCCTCCC	0.00137504
AGAGGCCGCTG	0.00136799
TCTCCAGTGCA	0.0013505
GACAGAGTTGC	0.00133366
GACAAACGCTA	0.00131373
CTGGGAGCCGC	0.00131032
CCCACACCGCG	0.00127705
AGCGCTGGTGA	0.0012499
CTCCGCCACTC	0.0012434
CATTCTAGCGG	0.00124152
GTATAGGGCAC	0.00123404
CGCTGATTTCC	0.00121982
CCCCTTGATCG	0.0012112
CACACTCGTCG	0.00119992
CAACGCCCAGG	0.00119725
ATTGAGTAGAC	0.00117224
CTGGGACGAAC	0.00114786
CAGCAGCCGAC	0.00114325
GGGATCCCTCA	0.00107535
ACTGAATCCGA	0.00105938
AACTGGGCGGA	0.00104602
GCGGTGTGGGA	0.00102315
ACGCCGCCCAC	0.00102229
GACGGCTTCTA	0.00101188
CCCCGTGTAGG	0.000987191
AACTCCGCCTC	0.00098637
CACTGACGCGG	0.000986321
AGATCTATTCC	0.000972656
GAGCCTGCGGA	0.000971883
CGGCGGCAATC	0.000967886
CCAGGATTTCG	0.000966885
CGCTCCGATCC	0.000965034
CCTTACGACGC	0.00096053
CACCGCGGATG	0.000959144
GTACCGGTTCA	0.000955015
CGCAGCGGAGA	0.000925937
CGCCGACTCTA	0.000917648
CCCCGCGTCAG	0.000908677
AGAGATCTCCT	0.000907161
CTATCGAGCGC	0.000902939
CTACCCAGGCC	0.000888784
ACTCATCGGGC	0.000886309
ATTCGCTCCGA	0.000882684
AGGGCAGTTGC	0.000882039
ACGTCTGGCAT	0.000869441
TAAGACCCCCA	0.00086807
CCACGAAGCCA	0.000867554
CAATGGGCTCC	0.000865947
ACTTATCCGAC	0.000864571
AGGCATCGCCC	0.000861149
AAGGCCCGGTG	0.000859494
CCGTCAGCGCA	0.000854176
CGCTACTGAAG	0.000852152
ATAACTGGATC	0.000849977
ACCCCGCGTCA	0.000847377
CGCTACCTAGC	0.000846598
ACTGTCGGACA	0.000846091
ACCGTCAGGAG	0.00084086
ACTCCCCCACG	0.000835867
CGAGACCTACG	0.000835012
GACCGTCGACA	0.000831757
GCCGAGACCGC	0.000827054
GCCTCCCCAGC	0.000827054
CTGAGCGCGCC	0.00082142
CACCGTGGGAG	0.000818062
ACCCACGAGCA	0.000818062
AAACCCCGCGT	0.000815311
CTATCCTTGCC	0.000813714
CGGGGTGCGAA	0.000812698
AGAGGCTTCCT	0.0008121
GCGGAACTACA	0.000809626
AGTTCGAGGCA	0.000808561
CAAGACTTCTG	0.000800429
CCGATTTCGAG	0.000795547
CCGCCACCGTC	0.000795347
AGCCCTATCAG	0.000793576
TCAAACGGGCA	0.000793308
GTAGTTCCGCA	0.000786742
CCAAGCGACAC	0.000783617
AACTCCCCCAC	0.000781863
AAATAGGCGGG	0.000779408
CATTGCGGGAC	0.000779294
CCGGTGGCATC	0.000779294
AAGGAGTCTTA	0.000778985
GTGGCCCTTAA	0.000777812
ACACTACACCG	0.000777636
CAGGATTGACC	0.000773498
CCTGCGTATTC	0.000772731
AAGTACTCGTA	0.000769739
CCACAGGGTGG	0.000766499
CATCCGCCTTA	0.000766154
CACAGTTGCGG	0.000765187
AGGAAGAGTGC	0.000764791
ACGCGCGGCAG	0.000755952
CGTCGGTAACA	0.000754467
CTTTCGCCCCC	0.000751569
GCGTTACAACC	0.00074989
ACGCAGGATAA	0.000747821
CGTTACTGCGA	0.000744278
CTGAGGGATCC	0.000744087
ACGAGGCGGTG	0.000743816
TAACACGCATA	0.00074352
CACATAACTCC	0.000741759
AGCCACCGGGC	0.000740907
CATAGTGACAC	0.000737807
CGGGTTTCCAA	0.000735892
CCCGAACTACG	0.000735197
GGACGACCAGA	0.000733402
TTCGGGGGAAA	0.00073284
GTCTTAAGGGA	0.000732626
CCCAGCTTACG	0.00073151
GCTAAGTGCTA	0.000730274
CCCCGAACAAC	0.000729122
TCGCATAAAGA	0.000728743
ACGGCAGATGG	0.000727521
ATTCCTCGTCG	0.000726131
AGAACCTGCGA	0.000726109
GCCACATCCGC	0.000725735
GGAGAATTTCA	0.000723241
CGGTACTGGCA	0.000720469
GGAAGGCATGA	0.000720052
GGTACCATGCA	0.00071844
GTAAGCTGGGA	0.00071751
CAATCTAGGGA	0.000716077
AGGGGTTGACG	0.000715046
GAGGGATCCCC	0.000714321
ATTCGTCTCAA	0.000713897
TAGACCTTAGA	0.000712687
TACAGTTTAGA	0.00071117
CTGTGCTCTCC	0.000710231
CTCTGTCCAAC	0.000707071
AGTGTGAGACC	0.000705895
ACGGAGCAGGA	0.000705302
AGAATTTCCCC	0.000704941
CCTAGTAATCC	0.000703525
ACCGCCCTGGC	0.000701761
ACATCCCACCG	0.000701368
GACTTCCTGGC	0.000699931
ACACTCTACTA	0.000699686
ACGGGTTGGGG	0.000697496
ACCAGCGCTCG	0.000695234
ATAGGCGGGTA	0.000695022
CTTACGACGCA	0.00069457
GTCTCCAGTCA	0.000693379
GGGACTGGGCA	0.000691897
AGTTATCCCGA	0.000690631
ACTGGCTGGCG	0.00069017
CGTAGAGTCCC	0.000690147
GCGGATATATA	0.000690019
GGGCAGGGCGA	0.00068754
TAACCTTCGAA	0.000686871
CATATGGTTAG	0.000686737
GCGGAATCGAA	0.000680311
AAGTACGCCAC	0.000677998
GAAGCCATATA	0.000677728
CCGATGGTGCG	0.000677246
AGGCGGTGACG	0.000676967
GTCCCTCAAAC	0.000676348
ATATGACTACC	0.000672793
GCTGTAGACCC	0.000672701
CGATTCCGCCC	0.000672583
AAAGTACACGG	0.000672216
CGCCACATGAG	0.000671413
CGGATTACTAG	0.000669821
GGGCATAAACC	0.000669325
GCCACTGCTTA	0.000665982
CTGCATAGGAC	0.000665082
AGGCCAGTGCC	0.000664399
AAGAGCCAGGC	0.000664079
GAGAGCACAGA	0.000663447
GACGGCTAAGC	0.000662941
GCATTCTATCC	0.000662684
CATATTCTACG	0.000660736
CCGTAATTGTC	0.000660343
ACACTTCTTAG	0.000660303
GACGGTAGAGC	0.00066003
CCGGTTCAAGC	0.000658875
CCCCGAACTAC	0.000658685
CCTTGGGTAGC	0.000658343
ATGAGGCCGAA	0.0006583
GCAGGTTAGGA	0.000658112
GAGGCTTCCTA	0.000656536
CGTGTTTGCGA	0.0006564
GCTTGTCCGAC	0.000656347
CAAGAGCCTGC	0.00065629
GACTAATGTTA	0.000656054
GTCAGCCTGGA	0.000655867
ATAAACGAAAC	0.000655687
GGCCTGTGCAC	0.000655094
GCCCCCAAAAC	0.0006544
CGCCGTGCCAG	0.00065427
AACGGATAGAT	0.000654088
CAACGCTCTAC	0.000653288
AGTTCACCGGC	0.000652882
GTCTGGCGTCA	0.000652704
TCATTCTTCGA	0.000652044
CGAGGTGTTAC	0.000652044
GGCGTTAATGA	0.000651638
CACCTCTGCAC	0.000651257
GCTGGAGGCAA	0.000649572
ACTGTGATGCT	0.000649537
CTTCTCCTTGC	0.000649527
ATAGAATCCGC	0.000649233
CAAAGGATGCG	0.000648558
AAGAGTGCGAG	0.000648453
CATGCTCCGGG	0.000647068
AACGCGGAGTG	0.000646793
ACCTAAGGAGA	0.000645874
ACTATCATCCT	0.00064587
CGATACTGCCA	0.000645405
ACGCCGACTCT	0.00064516
ATCGCGTTACA	0.000644988
GCGTTCCAGAA	0.000644819
ATCCTCGGTCG	0.000643973
TCATTCGTCGA	0.000643769
GCGAGACCTAC	0.000643368
AGACCGTCGAC	0.00064282
CCAACGCTGAG	0.000641302
AGTGAACCGAT	0.000639998
GAATGTTCCCC	0.000639944
ACGCAGTATCG	0.000639691
AGTGCGAGTAC	0.00063931
CACTAGTAATA	0.000638171
GAATTGCACGC	0.000637543
AACACGCATCC	0.000637145
CCCTTACGACG	0.000636934
AGGTTGGATAA	0.000636875
ACAGTTCGTCT	0.000635754
GACTCCGGCTA	0.000635627
ATTCTAATCGC	0.000634408
GCCGGCAAACC	0.000633046
GACATGAGTTA	0.000632176
ACCTCCCGATA	0.000631872
AATTGTAACAC	0.00063177
AATTCAGGGCC	0.000631148
GCTCCCGTTCC	0.000631148
TTATCGTCCAA	0.00063104
CGCCGGAGAAA	0.000630974
ACTGGGAGCCG	0.000630308
GCGGCCTCTCC	0.000630175
ATTCGCACGAC	0.000630018
CCAAGACTCCA	0.000629077
AAACTAAGCCG	0.000627271
ACACGGCAAGG	0.000627163
AGGACTTGGCC	0.000626846
CGACATGGGGA	0.000626643
AGCCCTTCCCG	0.000626605
GCGGTTCCTGA	0.000625424
CACCCGGCTAC	0.000625127
ACCTCACCGCT	0.000624263
CCGAGAGGTAG	0.000622442
CAATCGCGCTG	0.000622026
TACCGCCGAGA	0.000621741
AGAAGGGAATG	0.000620102
CTCATCGGGCC	0.000619425
TATGAAACGCA	0.000619362
CAAATAGCTAG	0.00061903
CATTAGGATAG	0.000617737
TGAATACAGCA	0.000617127
AAAAGTCCTGG	0.000616928
CCTGCTAGGTA	0.000616786
CCGCCTAATCG	0.00061678
CGTCCTCTACC	0.000616175
CTGCGGGAGAC	0.000615731
GACTTGTTACC	0.000615315
CATTAACGCGA	0.000614083
ACGGGCTATCG	0.000613564
ATGTAAGTCAC	0.000612638
GACATCGTGAC	0.00061256
GGTGCGAAAAC	0.000612299
CTGAGTGCATA	0.000611967
AACGTATGCAA	0.000611655
ACATTCACTCC	0.000611272
CGGTACATGGC	0.000610204
AGCGGCGTCCT	0.000609525
GGGATGAGGAC	0.000609051
CCTCGTAACCC	0.000608353
GCCGATCCGAC	0.000607952
ATCTTGCGTCG	0.000607619
AGGGTGCTCAG	0.000607162
GCCGCCGCAGA	0.000606867
CCTTACATCAA	0.000606491
ATGCGACAAAG	0.000606344
AAGAGTGAATT	0.000606135
CCTGTTAGTCG	0.000605022
CCACCTCTCGG	0.000604844
GATGACGGAGC	0.000603982
GGCACGCAGGA	0.000603417
AACTCTGGGAT	0.000603277
CAACGGCTGGA	0.000602426
CCAGGAAGTCG	0.000602331
ATGCTAACTGG	0.000600478
CGATCTCGTCA	0.000599847
ACCGACGGCTG	0.000599803
AACCGACGGCT	0.000598559
GCCTGAAGGCC	0.000598455
AAGGAGAGGCC	0.00059812
CCATTCGATCC	0.000596056
AACTATCTGTG	0.000595286
AACTGCCTTGT	0.000594752
CTCACGCCCGA	0.00059471
CCATGCTACCC	0.000594061
TCCACGCCGCA	0.000593837
CTTACTGATAC	0.000592213
GTGCGCCACTA	0.000591464
ACTCCGTATTA	0.00059125
CAGGATTTCGC	0.000588749
GCTCCCCTCCC	0.000588115
ACGGGCGACGC	0.000587644
AGCAGGGGACC	0.000587641
CGGGGGTAATC	0.000587195
AGGTTTTCGTA	0.000586862
AATCTTGGGTC	0.000586862
ATTCCAACCTA	0.000586287
GCGAGCATAGC	0.00058596
ATCTCAGCGTC	0.000585017
AAATGAACGTG	0.000584343
CAGGACAGATC	0.00058348
AGCCGCGCCCG	0.000582015
GACGGCGCTCA	0.000581382
CATTGGTCGCG	0.000581148
CAGTTCACCGG	0.000580965
TATAGGCGCGA	0.000580901
CTGGCAAAGGA	0.000580685
ACCCGGCATCG	0.000579215
CCCCAGCAGCG	0.000579035
GCGTCCTCCCA	0.000578825
ACCCGATGTTA	0.000578701
ATTATCTACGA	0.000578374
GGCATGAGGGA	0.000578127
ATTGCGAGTTA	0.000577434
GCGATAAGCGC	0.000577242
CGAAATTTAGA	0.000576863
CGGTCTTCGAC	0.000576646
CGATGATCCCA	0.000576473
CTCTTAGCTGC	0.000576434
AACCCGGCATC	0.000576286
ATGTACACGGC	0.000576186
CTAGGTAGCGC	0.000575898
ATCGGAAGACA	0.000575096
CGGAAAAGATA	0.000574698
GTTCGTCTGCA	0.000574304
CGCGTTAAGAG	0.000574028
GCGAATGACCA	0.000573331
CCAGATTCTCC	0.000572842
ATTGGACCCTC	0.000572549
CGAACGAATAC	0.000572535
CCGACAGATTA	0.000572405
GTGATCTGATA	0.000572405
GCCGAATACAC	0.000572113
ACGTGGGATAG	0.000572061
ATCAGCTATCA	0.000571047
AGGGCCAAATA	0.00057003
CCAGCGACGGA	0.000568895
CGACCGAGAGC	0.000568685
CGCTGCATAGC	0.000568587
AGGAATGGTAT	0.000568541
ATCATCCTGGC	0.000568018
CAGTGCATAGA	0.000567454
GCGTCTTCTCC	0.000566619
CAGTCCCACTG	0.000565962
CCCTGGCAAAG	0.000565752
CTTTTCCCGAA	0.000564037
ACCAACCTCAG	0.000563653
AACCCCTGATT	0.000563608
CCTATGCCCTA	0.000563238
CGTCTATGGGA	0.000562483
GGCGTCGAACA	0.000561192
GAGCGATGCGA	0.000560516
GCAGCAGACTA	0.000559923
AGCTCCACTTG	0.000559589
CCTTAGCTGAC	0.000559262
CGGGTTGGGGA	0.000558708
GGAGGGTGGCC	0.000558308
TCACCTCCCGA	0.00055828
TCCAATACGCA	0.000558107
AGCTCTCTTCC	0.000557969
ACATTGGAAAC	0.000557176
ATACGTCGAAG	0.00055708
ACGTAGCGTAC	0.000556322
GCGTGTACCCC	0.000555471
CGTTATCCGCC	0.000555322
AGGAAACCAGA	0.00055418
CAGCCACACCG	0.000553767
CATCCGAAGCG	0.000553605
CGCCTTACCCG	0.000552239
TCAGGCCGGCA	0.00055198
ATACGGGTGCC	0.000550981
AGTCTGTACGG	0.000549759
AGTGAGCCACC	0.00054936
ACTTCCTGGCG	0.000549136
CCCACTGTAAG	0.00054869
AGTCAGCCTGG	0.000548252
CGTAGAGAACC	0.000547162
GGTTATAGGGA	0.000547031
CTGGTTAACCC	0.00054703
CGGCAAGCGAA	0.000546872
GTAAGGATTGA	0.000546729
ATTACTAGTGC	0.000546059
CGGATTCAGTC	0.000545563
CGTCCCAGCAC	0.000545285
GAGCGATTAGA	0.000545167
CGACACGCTCG	0.000544434
CCTACGTTGAA	0.000544348
CGGGTAAGACC	0.00054392
AGTATGGGATA	0.00054385
ATAGTTGTGTC	0.000543732
ATCAGGGGTTG	0.00054315
AGTCGACCGAT	0.000542918
CTGGCCTCACA	0.00054266
ATAAGTTCCCG	0.000541173
GAACTGCACAA	0.000540572
AGACTTGTACA	0.000540276
CATCCGCTAGA	0.000539846
ATAGGTCTAGA	0.000539144
GATTCCCGACC	0.000537389
ATCTTCGTATC	0.000537292
AGCGGGGAAAT	0.000536492
ACAAGACATGC	0.000534928
CACGAAACCAC	0.000534813
CTGTCATGCGC	0.000534701
GCGAACTGACC	0.000534235
CGCATTCTAGC	0.000534183
GGAAATGCCCC	0.00053371
GTTTTCCCGGA	0.000532436
AGAGAATATAC	0.000531959
CAACGATAAGG	0.000531892
CATAGAACGCC	0.000530815
AAGAGGCAACC	0.000530111
AGACACCTTCA	0.000529574
CCATGTACCGG	0.000528875
AACCGAAATTC	0.000527975
AGATCCGTCTA	0.000526601
GGAGTACATCA	0.000525662
ACATTGCCCGG	0.000525288
AACGAGCAGGT	0.000524852
AGGTGAGGAAA	0.000523485
GACGTTTTCCC	0.000523341
ACATACATGCT	0.000523102
TAGAGCTGAGA	0.000522934
CAAGCTAACAC	0.000522865
AATGCCCCTTG	0.000522746
CGTAATCGGGA	0.000522338
CCACTATCCCA	0.000520936
AGCTCTGATCG	0.000520189
AGAGTGTGGGC	0.000518925
AGCCGGCAAAC	0.000518229
ATAAGCGGGGA	0.000518187
GGACGCGAATA	0.000517549
AGACGGTGGCG	0.000517299
CAGAGCAGGAC	0.000517128
CTCCGGCTATC	0.000516623
AGACGAACATA	0.000516301
GCTGGTAACCC	0.000516216
CACGTTTCTAA	0.000515863
ACACACACTCC	0.000515607
CACCGTCTCAG	0.000515209
AGCGAGACCTA	0.000513782
CTGCCGTCAAC	0.000511433
CGAACGGATCA	0.000510915
CAAGTGCGTAA	0.000510759
ACGGACAGGGA	0.000510651
GCTAGCATCAC	0.000510567
CGTGGGAATTA	0.000510311
AACTCATCGGG	0.000509831
TCGGATCGAAA	0.000509781
GGGAGTGGCTA	0.000509329
ATGCATCGTCG	0.000509139
CACAAGGTCCG	0.000508979
GGAAGAACCTA	0.000508809
CACATCTTAAC	0.000507577
ACACCGAGTCA	0.00050657
ATAGAAATTAC	0.00050432
CTCCTTCATGA	0.000504068
CGGGCTTCTAA	0.000504022
CACCCCCTTCC	0.000503904
TACTCCCCTGA	0.000501932
CGTCATCTGTC	0.000501417
CAGCCTGGAGA	0.000501003
CGACTGAATCC	0.00050078

[truncated: 4 more sheets: Ciprofloxacin, Levofloxacin, Minocycline, Trimethoprim-sulfamethoxazole]
