# Supplementary material for: Machine learning and feature extraction for rapid antimicrobial resistance prediction of Acinetobacter baumannii from whole-genome sequencing data
Source: Front Microbiol. 2024 Jan 11;14:1320312. doi: 10.3389/fmicb.2023.1320312 (PMC10808480; doi:10.3389/fmicb.2023.1320312)
Supplement: Supplementary file 6 [file Table_5.xlsx]

## Sheet: Sheet1
Table S32. Performance of the top-ranked 11-mers models for the independent test dataset in this study.
Antimicrobial agents	Recall/Sensitivity [95% CI]	Specificity [95% CI]	NPV [95% CI]	PPV [95% CI]	VME [95% CI]	ME [95% CI]	EA [95% CI]	CA [95% CI]
Imipenem	97.25% [95.27%; 99.23%]	100.00% [100.00%; 100.00%]	82.50% [70.46%; 94.54%]	100.00% [100.00%; 100.00%]	2.75% [0.77%; 4.73%]	0.00% [0.00%; 0.00%]	97.08% [94.95%; 99.21%]	97.50% [95.69%; 99.31%]
		#NUM!	82.5%[70.46%; 94.54%]	#NUM!	2.75%[0.77%; 4.73%]	#NUM!	97.08%[94.95%; 99.21%]	97.5%[95.69%; 99.31%]
Meropenem	97.27% [95.30%; 99.24%]	100.00% [100.00%; 100.00%]	81.67% [69.30%; 94.04%]	100.00% [100.00%; 100.00%]	2.73% [0.76%; 4.70%]	0.00% [0.00%; 0.00%]	96.67% [94.30%; 99.04%]	97.50% [95.69%; 99.31%]
	97.27%[95.3%; 99.24%]	#NUM!	81.67%[69.3%; 94.04%]	#NUM!	2.73%[0.76%; 4.7%]	#NUM!	96.67%[94.3%; 99.04%]	97.5%[95.69%; 99.31%]
Colistin	96.67% [90.14%; 100.00%]	100.00% [100.00%; 100.00%]	99.55% [98.66%; 100.00%]	100.00% [100.00%; 100.00%]	3.33% [0.00%; 9.86%]	0.00% [0.00%; 0.00%]	95.83% [94.11%; 97.55%]	99.58% [98.76%; 100.00%]
	96.67%[90.14%; 103.2%]	#NUM!	99.55%[98.66%; 100.44%]	#NUM!	3.33%[-3.2%; 9.86%]	#NUM!	95.83%[94.11%; 97.55%]	99.58%[98.76%; 100.4%]
Tigecycline	97.5% [92.60%; 100.00%]	100.00% [100.00%; 100.00%]	99.52% [98.59%; 100.00%]	100.00% [100.00%; 100.00%]	2.50% [0.00%; 7.40%]	0.00% [0.00%; 0.00%]	92.50% [89.83%; 95.17%]	99.58% [98.76%; 100.00%]
	97.5%[92.6%; 102.4%]	#NUM!	99.52%[98.59%; 100.45%]	#NUM!	2.5%[-2.4%; 7.4%]	#NUM!	92.5%[89.83%; 95.17%]	99.58%[98.76%; 100.4%]
Cefepime	95.45% [94.12%; 96.78%]	100.00% [100.00%; 100.00%]	68.33% [60.71%; 75.95%]	100.00% [100.00%; 100.00%]	4.55% [3.22%; 5.88%]	0.00% [0.00%; 0.00%]	95.83% [94.61%; 97.05%]	95.83% [94.61%; 97.05%]
	95.45%[94.12%; 96.78%]	#NUM!	68.33%[60.71%; 75.95%]	#NUM!	4.55%[3.22%; 5.88%]	#NUM!	95.83%[94.61%; 97.05%]	95.83%[94.61%; 97.05%]
Ceftazidime	97.73% [95.74%; 99.72%]	100.00% [100.00%; 100.00%]	85.00% [72.63%; 97.37%]	100.00% [100.00%; 100.00%]	2.27% [0.28%; 4.26%]	0.00% [0.00%; 0.00%]	96.25% [93.99%; 98.51%]	97.92% [96.09%; 99.75%]
	97.73%[95.74%; 99.72%]	#NUM!	85%[72.63%; 97.37%]	#NUM!	2.27%[0.28%; 4.26%]	#NUM!	96.25%[93.99%; 98.51%]	97.92%[96.09%; 99.75%]
Cefoperazone-sulbactam	99.00% [97.04%; 100.00%]	100.00% [100.00%; 100.00%]	96.67% [90.14%; 100.00%]	100.00% [100.00%; 100.00%]	1.00% [0.00%; 2.96%]	0.00% [0.00%; 0.00%]	99.17% [97.54%; 100.00%]	99.17% [97.54%; 100.00%]
	99%[97.04%; 100.96%]	#NUM!	96.67%[90.14%; 103.2%]	#NUM!	1%[-0.96%; 2.96%]	#NUM!	99.17%[97.54%; 100.8%]	99.17%[97.54%; 100.8%]
Piperacillin-tazobactam	98.64% [97.28%; 100.00%]	100.00% [100.00%; 100.00%]	90.00% [80.02%; 99.98%]	100.00% [100.00%; 100.00%]	1.36% [0.00%; 2.72%]	0.00% [0.00%; 0.00%]	98.75% [97.50%; 100.00%]	98.75% [97.50%; 100.00%]
	98.64%[97.28%; 100%]	#NUM!	90%[80.02%; 99.98%]	#NUM!	1.36%[0%; 2.72%]	#NUM!	98.75%[97.5%; 100%]	98.75%[97.5%; 100%]
Amikacin	96.11% [94.45%; 97.77%]	100.00% [100.00%; 100.00%]	90.00% [85.72%; 94.28%]	100.00% [100.00%; 100.00%]	3.89% [2.23%; 5.55%]	0.00% [0.00%; 0.00%]	95.42% [93.16%; 97.68%]	97.08% [95.83%; 98.33%]
		#NUM!		#NUM!		#NUM!
Ciprofloxacin	99.09% [97.90%; 100.00%]	100.00% [100.00%; 100.00%]	93.33% [84.62%; 100.00%]	100.00% [100.00%; 100.00%]	0.91% [0.00%; 2.1%]	0.00% [0.00%; 0.00%]	97.92% [95.73%; 100.00%]	99.17% [98.08%; 100.00%]
	99.09%[97.9%; 100.28%]	#NUM!	93.33%[84.62%; 102.04%]	#NUM!	0.91%[-0.28%; 2.1%]	#NUM!	97.92%[95.73%; 100.11%]	99.17%[98.08%; 100.26%]
Levofloxacin	97.50% [95.31%; 99.69%]	100.00% [100.00%; 100.00%]	85.00% [72.63%; 97.37%]	100.00% [100.00%; 100.00%]	2.50% [0.31%; 4.69%]	0.00% [0.00%; 0.00%]	95.00% [92.53%; 97.47%]	97.73% [95.74%; 99.72%]
	97.5%[95.31%; 99.69%]	#NUM!	85%[72.63%; 97.37%]	#NUM!	2.5%[0.31%; 4.69%]	#NUM!	95%[92.53%; 97.47%]	97.73%[95.74%; 99.72%]
Minocycline	92.31% [90.06%; 94.56%]	97.78% [94.88%; 100.00%]	90.07% [87.39%; 92.75%]	98.52% [96.58%; 100.00%]	7.69% [5.44%; 9.94%]	2.22% [0.00%; 5.12%]	92.73% [89.42%; 96.04%]	94.55% [93.36%; 95.74%]
	92.31%[90.06%; 94.56%]	97.78%[94.88%; 100.68%]	90.07%[87.39%; 92.75%]	98.52%[96.58%; 100.46%]	7.69%[5.44%; 9.94%]	2.22%[-0.68%; 5.12%]	92.73%[89.42%; 96.04%]	94.55%[93.36%; 95.74%]
Trimethoprim-sulfamethoxazole	99.29% [97.89%; 100.00%]	100.00% [100.00%; 100.00%]	98.57% [95.77%; 100.00%]	100.00% [100.00%; 100.00%]	0.71% [0.00%; 2.11%]	0.00% [0.00%; 0.00%]	95.00% [92.93%; 97.07%]	99.50% [98.52%; 100.00%]
	99.29%[97.89%; 100.69%]	#NUM!	98.57%[95.77%; 101.37%]	#NUM!	0.71%[-0.69%; 2.11%]	#NUM!	95%[92.93%; 97.07%]	99.5%[98.52%; 100.48%]
